# Supplementary material for: Oxygenated Theonellastrols: Interpretation of Unusual Chemical Behaviors Using Quantum Mechanical Calculations and Stereochemical Reassignment of 7α-Hydroxytheonellasterol
Source: MDPI journal article supplement (doi:10.3390/md18120607), 2020-11-30
Supplement: s1 [file s1]

## Supporting Information II

*Spectral data*

# Interpretation of Unusual Chemical Behaviors of Oxygenated theonellastrols using Quantum Mechanical Calculations and Stereochemical reassignment of $7\alpha$ - hydroxytheonellasterol

*A-Young Shin,<sup>1,2</sup> Hyi-Seung Lee,<sup>1,2</sup> Yeon-Ju Lee,<sup>1,2</sup> Jong Seok Lee,<sup>1,2</sup> Arang Son,<sup>3</sup> Changhoon Cho,<sup>3</sup>*

*and Jihoon Lee\*<sup>1,2</sup>*

<sup>1</sup>Korea Institute of Ocean Science and Technology (KIOST), Busan 49111, Republic of Korea

<sup>2</sup>Department of Marine Biotechnology, University of Science and Technology (UST), Daejeon 34113, Republic of Korea

<sup>3</sup>Department of Radiation Oncology, Samsung Medical Center, Seoul 06351, Republic of Korea

## Table of contents

|                                                                                                                        |    |
|------------------------------------------------------------------------------------------------------------------------|----|
| Figure SII-1. $^1\text{H}$ NMR spectrum of compound <b>1</b> ( $\text{C}_6\text{D}_6$ , 600 MHz).....                  | 4  |
| Figure SII-2. $^{13}\text{C}$ NMR spectrum of compound <b>1</b> ( $\text{C}_6\text{D}_6$ , 150 MHz).....               | 4  |
| Figure SII-3. HSQC spectrum of compound <b>1</b> ( $\text{C}_6\text{D}_6$ , 600 MHz).....                              | 5  |
| Figure SII-4. $^1\text{H}$ - $^1\text{H}$ COSY spectrum of compound <b>1</b> ( $\text{C}_6\text{D}_6$ , 600 MHz).....  | 5  |
| Figure SII-5. HMBC spectrum of compound <b>1</b> ( $\text{C}_6\text{D}_6$ , 600 MHz).....                              | 6  |
| Figure SII-6. NOESY spectrum of compound <b>1</b> ( $\text{C}_6\text{D}_6$ , 600 MHz).....                             | 6  |
| Figure SII-7. HRMS spectrum of compound <b>1</b> .....                                                                 | 7  |
| Figure SII-8. $^1\text{H}$ NMR spectrum of compound <b>2</b> ( $\text{C}_6\text{D}_6$ , 600 MHz).....                  | 8  |
| Figure SII-9. $^{13}\text{C}$ NMR spectrum of compound <b>2</b> ( $\text{C}_6\text{D}_6$ , 150 MHz).....               | 8  |
| Figure SII-10. HSQC spectrum of compound <b>2</b> ( $\text{C}_6\text{D}_6$ , 600 MHz).....                             | 9  |
| Figure SII-11. $^1\text{H}$ - $^1\text{H}$ COSY spectrum of compound <b>2</b> ( $\text{C}_6\text{D}_6$ , 600 MHz)..... | 9  |
| Figure SII-12. HMBC spectrum of compound <b>2</b> ( $\text{C}_6\text{D}_6$ , 600 MHz).....                             | 10 |
| Figure SII-13. NOESY spectrum of compound <b>2</b> ( $\text{C}_6\text{D}_6$ , 600 MHz).....                            | 10 |
| Figure SII-14. HRMS spectrum of compound <b>2</b> .....                                                                | 11 |
| Figure SII-15. $^1\text{H}$ NMR spectrum of compound <b>3</b> ( $\text{C}_6\text{D}_6$ , 600 MHz).....                 | 12 |
| Figure SII-16. $^{13}\text{C}$ NMR spectrum of compound <b>3</b> ( $\text{C}_6\text{D}_6$ , 150 MHz).....              | 12 |
| Figure SII-17. HSQC spectrum of compound <b>3</b> ( $\text{C}_6\text{D}_6$ , 600 MHz).....                             | 13 |
| Figure SII-18. $^1\text{H}$ - $^1\text{H}$ COSY spectrum of compound <b>3</b> ( $\text{C}_6\text{D}_6$ , 600 MHz)..... | 13 |
| Figure SII-19. HMBC spectrum of compound <b>3</b> ( $\text{C}_6\text{D}_6$ , 600 MHz).....                             | 14 |
| Figure SII-20. NOESY spectrum of compound <b>3</b> ( $\text{C}_6\text{D}_6$ , 600 MHz).....                            | 14 |
| Figure SII-21. HRMS spectrum of compound <b>3</b> .....                                                                | 15 |
| Figure SII-22. $^1\text{H}$ NMR spectrum of compound <b>4</b> ( $\text{C}_6\text{D}_6$ , 600 MHz).....                 | 16 |
| Figure SII-23. $^{13}\text{C}$ NMR spectrum of compound <b>4</b> ( $\text{C}_6\text{D}_6$ , 150 MHz).....              | 16 |
| Figure SII-24. HSQC spectrum of compound <b>4</b> ( $\text{C}_6\text{D}_6$ , 600 MHz).....                             | 17 |
| Figure SII-25. $^1\text{H}$ - $^1\text{H}$ COSY spectrum of compound <b>4</b> ( $\text{C}_6\text{D}_6$ , 600 MHz)..... | 17 |
| Figure SII-26. HMBC spectrum of compound <b>4</b> ( $\text{C}_6\text{D}_6$ , 600 MHz).....                             | 18 |
| Figure SII-27. NOESY spectrum of compound <b>4</b> ( $\text{C}_6\text{D}_6$ , 600 MHz).....                            | 18 |
| Figure SII-28. $^1\text{H}$ NMR spectrum of compound <b>5</b> ( $\text{C}_6\text{D}_6$ , 600 MHz).....                 | 19 |
| Figure SII-29. $^{13}\text{C}$ NMR spectrum of compound <b>5</b> ( $\text{C}_6\text{D}_6$ , 150 MHz).....              | 19 |
| Figure SII-30. HSQC spectrum of compound <b>5</b> ( $\text{C}_6\text{D}_6$ , 600 MHz).....                             | 20 |
| Figure SII-31. $^1\text{H}$ - $^1\text{H}$ COSY spectrum of compound <b>5</b> ( $\text{C}_6\text{D}_6$ , 600 MHz)..... | 20 |
| Figure SII-32. HMBC spectrum of compound <b>5</b> ( $\text{C}_6\text{D}_6$ , 600 MHz).....                             | 21 |
| Figure SII-33. NOESY spectrum of compound <b>5</b> ( $\text{C}_6\text{D}_6$ , 600 MHz).....                            | 21 |
| Figure SII-34. HRMS spectrum of compound <b>5</b> .....                                                                | 22 |
| Figure SII-35. $^1\text{H}$ NMR spectrum of compound <b>6</b> ( $\text{CDCl}_3$ , 600 MHz).....                        | 23 |
| Figure SII-36. $^{13}\text{C}$ NMR spectrum of compound <b>6</b> ( $\text{CDCl}_3$ , 150 MHz).....                     | 23 |

|                                                                                                                                    |    |
|------------------------------------------------------------------------------------------------------------------------------------|----|
| <b>Figure SII-37.</b> HSQC spectrum of compound <b>6</b> (CDCl <sub>3</sub> , 600 MHz).                                            | 24 |
| <b>Figure SII-38.</b> <sup>1</sup> H- <sup>1</sup> H COSY spectrum of compound <b>6</b> (CDCl <sub>3</sub> , 600 MHz).             | 24 |
| <b>Figure SII-39.</b> HMBC spectrum of compound <b>6</b> (CDCl <sub>3</sub> , 600 MHz).                                            | 25 |
| <b>Figure SII-40.</b> NOESY spectrum of compound <b>6</b> (CDCl <sub>3</sub> , 600 MHz).                                           | 25 |
| <b>Figure SII-41.</b> HRMS spectrum of compound <b>6</b> .                                                                         | 26 |
| <b>Figure SII-42.</b> <sup>1</sup> H NMR spectrum of compound <b>7</b> (C <sub>6</sub> D <sub>6</sub> , 600 MHz).                  | 27 |
| <b>Figure SII-43.</b> <sup>13</sup> C NMR spectrum of compound <b>7</b> (C <sub>6</sub> D <sub>6</sub> , 150 MHz).                 | 27 |
| <b>Figure SII-44.</b> HSQC spectrum of compound <b>7</b> (C <sub>6</sub> D <sub>6</sub> , 600 MHz).                                | 28 |
| <b>Figure SII-45.</b> <sup>1</sup> H- <sup>1</sup> H COSY spectrum of compound <b>7</b> (C <sub>6</sub> D <sub>6</sub> , 600 MHz). | 28 |
| <b>Figure SII-46.</b> HMBC spectrum of compound <b>7</b> (C <sub>6</sub> D <sub>6</sub> , 600 MHz).                                | 29 |
| <b>Figure SII-47.</b> NOESY spectrum of compound <b>7</b> (C <sub>6</sub> D <sub>6</sub> , 600 MHz).                               | 29 |
| <b>Figure SII-48.</b> HRMS spectrum of compound <b>7</b> .                                                                         | 30 |
| <b>Figure SII-49.</b> <sup>1</sup> H NMR spectrum of compound <b>8</b> (CDCl <sub>3</sub> , 600 MHz).                              | 31 |
| <b>Figure SII-50.</b> <sup>13</sup> C NMR spectrum of compound <b>8</b> (CDCl <sub>3</sub> , 150 MHz).                             | 31 |
| <b>Figure SII-51.</b> HSQC spectrum of compound <b>8</b> (CDCl <sub>3</sub> , 600 MHz).                                            | 32 |
| <b>Figure SII-52.</b> <sup>1</sup> H- <sup>1</sup> H COSY spectrum of compound <b>8</b> (CDCl <sub>3</sub> , 600 MHz).             | 32 |
| <b>Figure SII-53.</b> HMBC spectrum of compound <b>8</b> (CDCl <sub>3</sub> , 600 MHz).                                            | 33 |
| <b>Figure SII-54.</b> NOESY spectrum of compound <b>8</b> (CDCl <sub>3</sub> , 600 MHz).                                           | 33 |
| <b>Figure SII-55.</b> HRMS spectrum of compound <b>8</b> .                                                                         | 34 |
| <b>Figure SII-56.</b> <sup>1</sup> H NMR spectrum of compound <b>9</b> (C <sub>6</sub> D <sub>6</sub> , 600 MHz).                  | 35 |
| <b>Figure SII-57.</b> <sup>13</sup> C NMR spectrum of compound <b>9</b> (C <sub>6</sub> D <sub>6</sub> , 150 MHz).                 | 35 |
| <b>Figure SII-58.</b> HSQC spectrum of compound <b>9</b> (C <sub>6</sub> D <sub>6</sub> , 600 MHz).                                | 36 |
| <b>Figure SII-59.</b> <sup>1</sup> H- <sup>1</sup> H COSY spectrum of compound <b>9</b> (C <sub>6</sub> D <sub>6</sub> , 600 MHz). | 36 |
| <b>Figure SII-60.</b> HMBC spectrum of compound <b>9</b> (C <sub>6</sub> D <sub>6</sub> , 600 MHz).                                | 37 |
| <b>Figure SII-61.</b> NOESY spectrum of compound <b>9</b> (C <sub>6</sub> D <sub>6</sub> , 600 MHz).                               | 37 |
| <b>Figure SII-62.</b> <sup>1</sup> H NMR spectrum of 3-OMe-swinhosterol C <b>10</b> (C <sub>6</sub> D <sub>6</sub> , 600 MHz).     | 38 |
| <b>Figure SII-63.</b> <sup>13</sup> C NMR spectrum of 3-OMe-swinhosterol C <b>10</b> (C <sub>6</sub> D <sub>6</sub> , 150 MHz).    | 38 |
| <b>Figure SII-64.</b> NOESY spectrum of 3-OMe-swinhosterol C <b>10</b> (C <sub>6</sub> D <sub>6</sub> , 600 MHz).                  | 39 |
| <b>Figure SII-65.</b> HRMS spectrum of compound <b>10</b> .                                                                        | 39 |

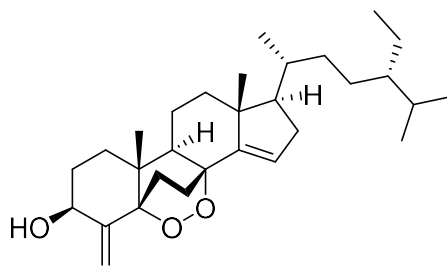

**1**

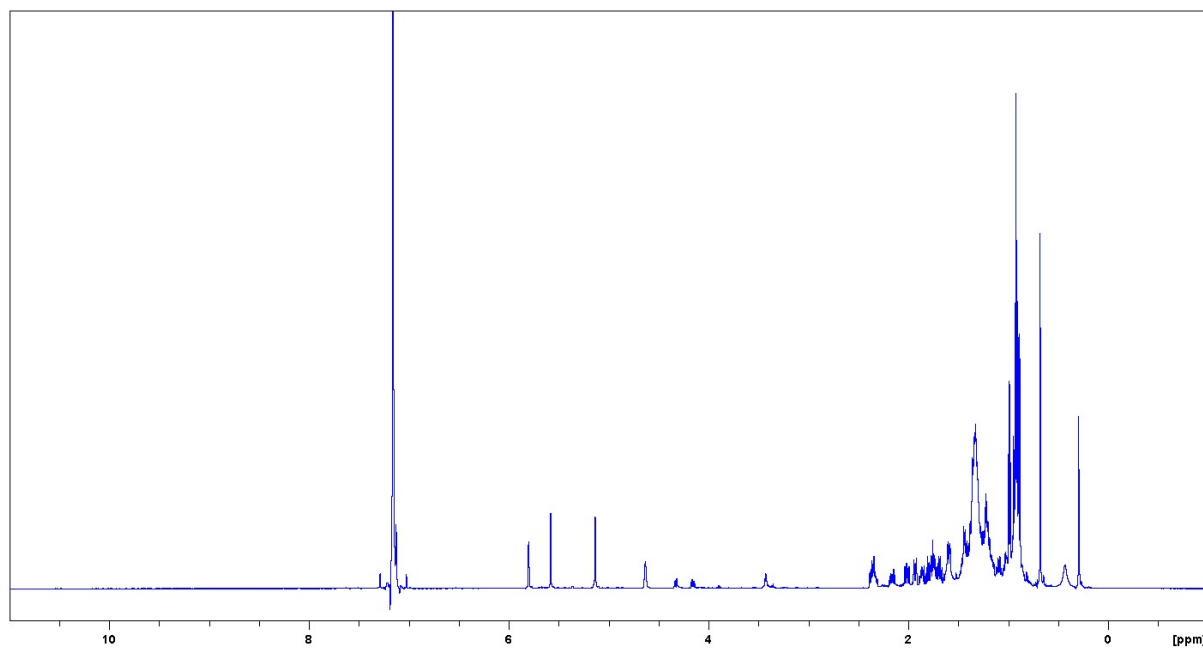

**Figure SII-1.**  $^1\text{H}$  NMR spectrum of compound **1** ( $\text{CDCl}_3$ , 600 MHz).

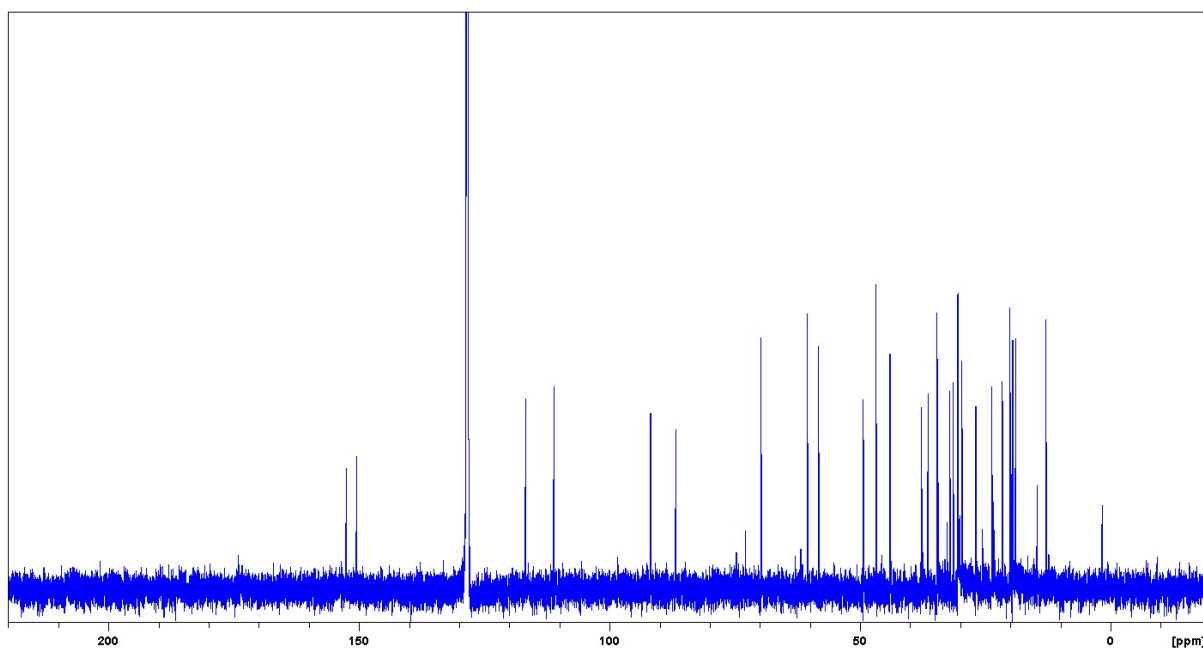

**Figure SII-2.**  $^{13}\text{C}$  NMR spectrum of compound **1** ( $\text{CDCl}_3$ , 150 MHz).

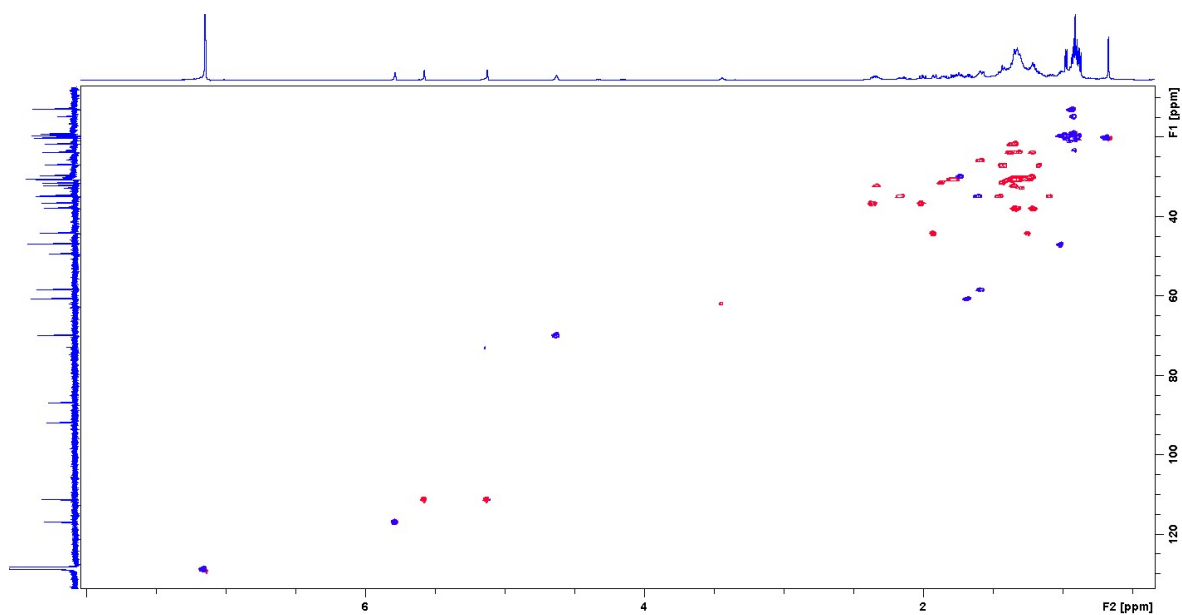

**Figure SII-3.** HSQC spectrum of compound **1** ( $C_6D_6$ , 600 MHz).

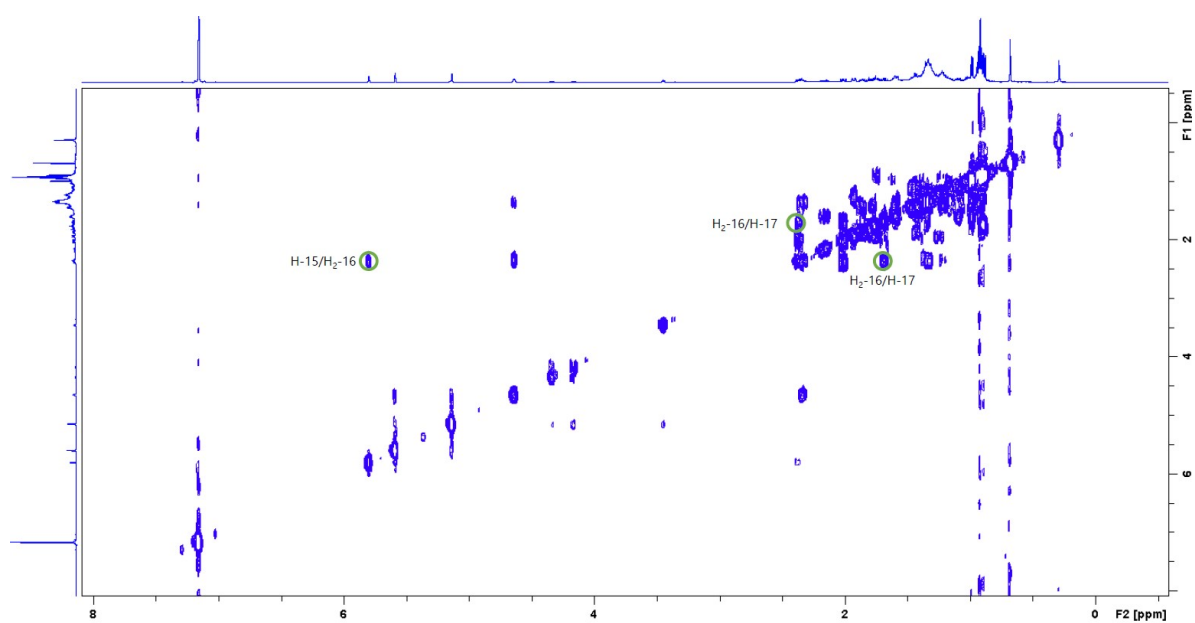

**Figure SII-4.**  $^1H$ - $^1H$  COSY spectrum of compound **1** ( $C_6D_6$ , 600 MHz).

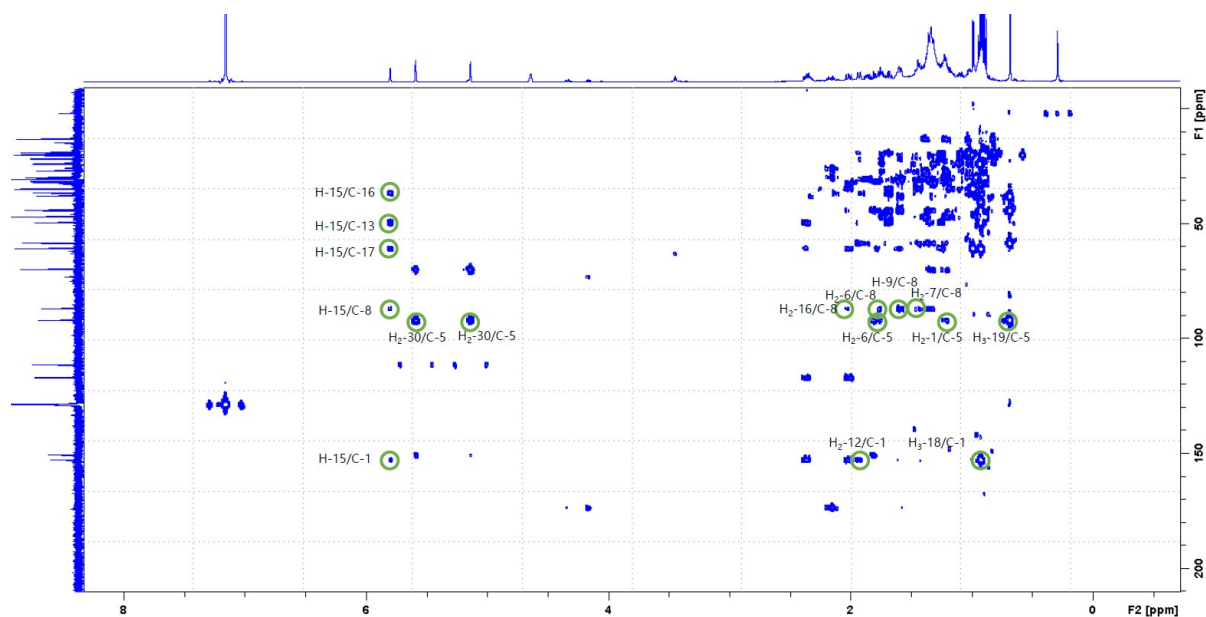

**Figure SII-5.** HMBC spectrum of compound **1** ( $C_6D_6$ , 600 MHz).

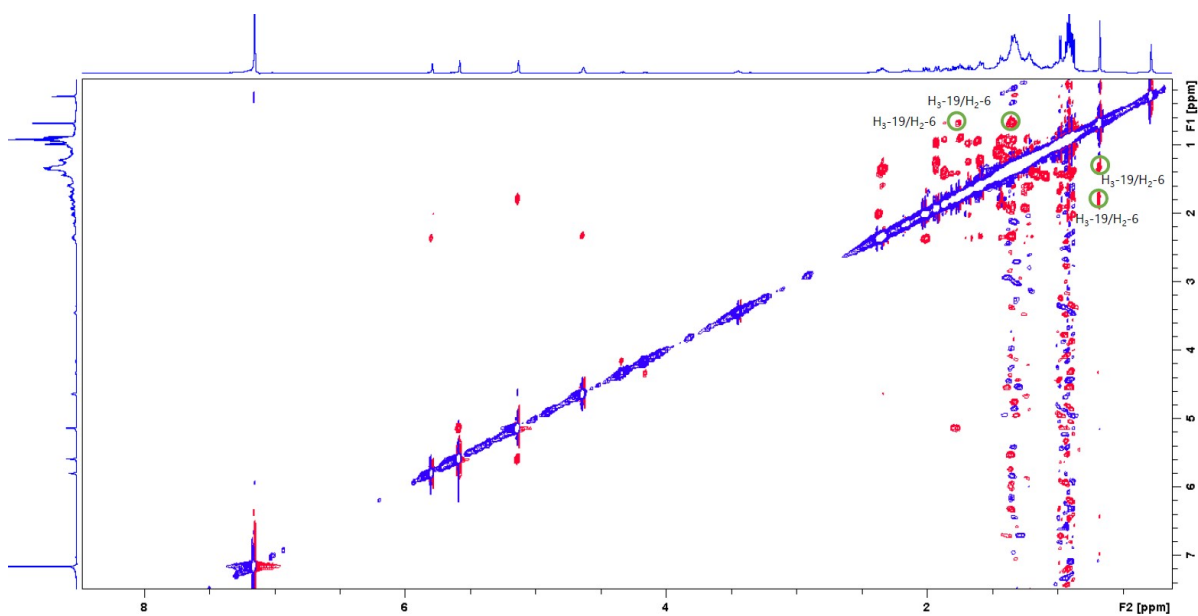

**Figure SII-6.** NOESY spectrum of compound **1** ( $C_6D_6$ , 600 MHz).

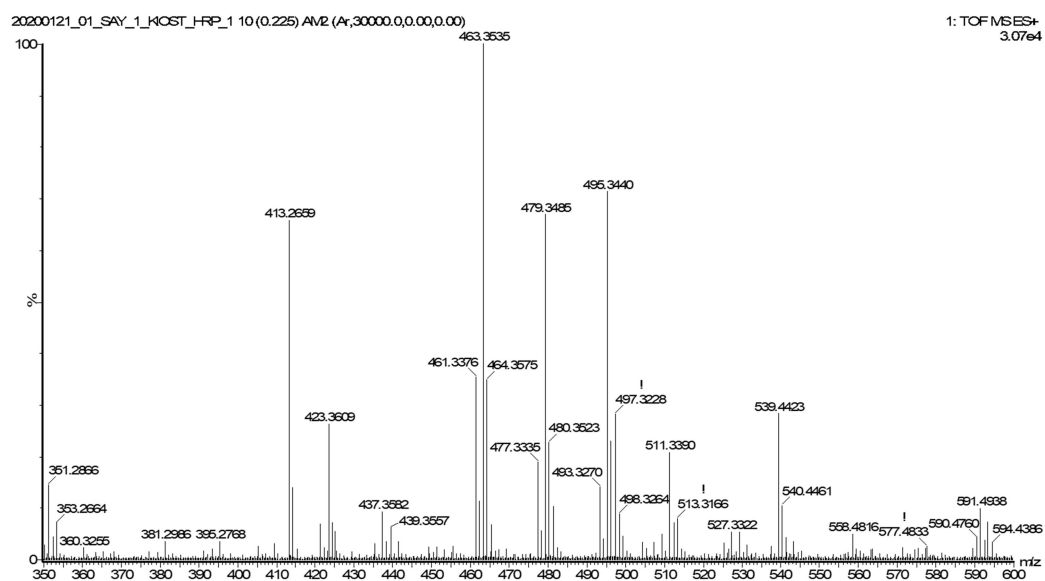

**Figure SII-7.** HRMS spectrum of compound **1**.

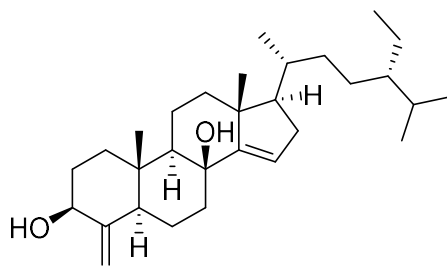

2

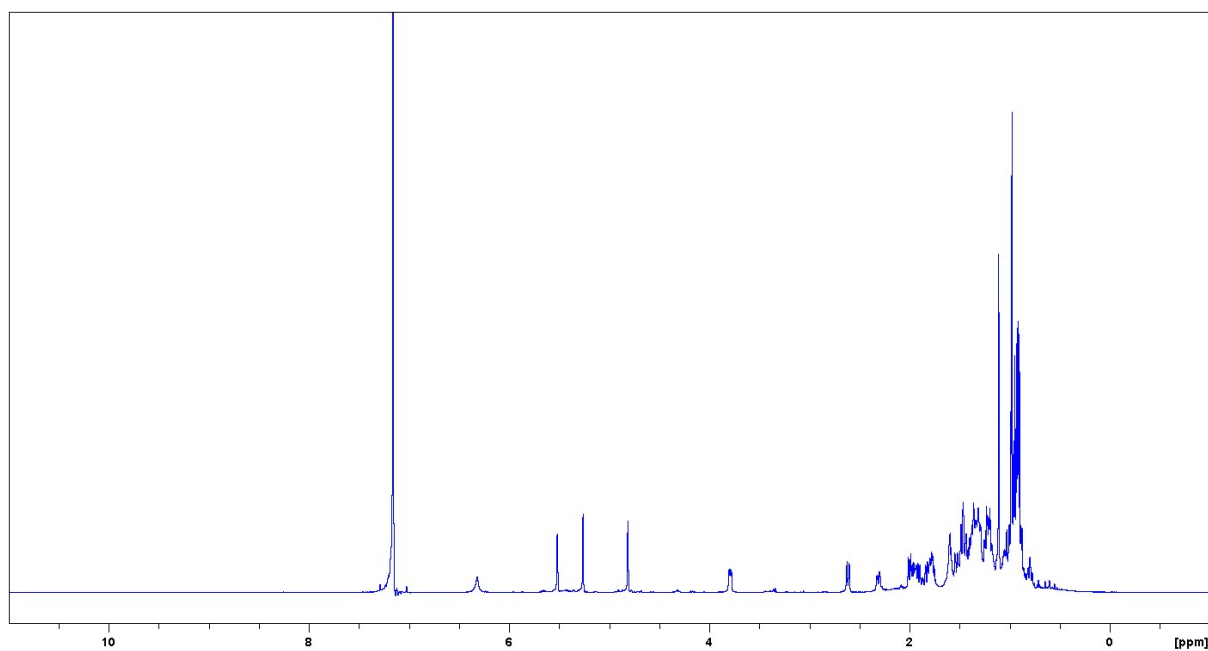

Figure SII-8.  $^1\text{H}$  NMR spectrum of compound 2 ( $\text{C}_6\text{D}_6$ , 600 MHz).

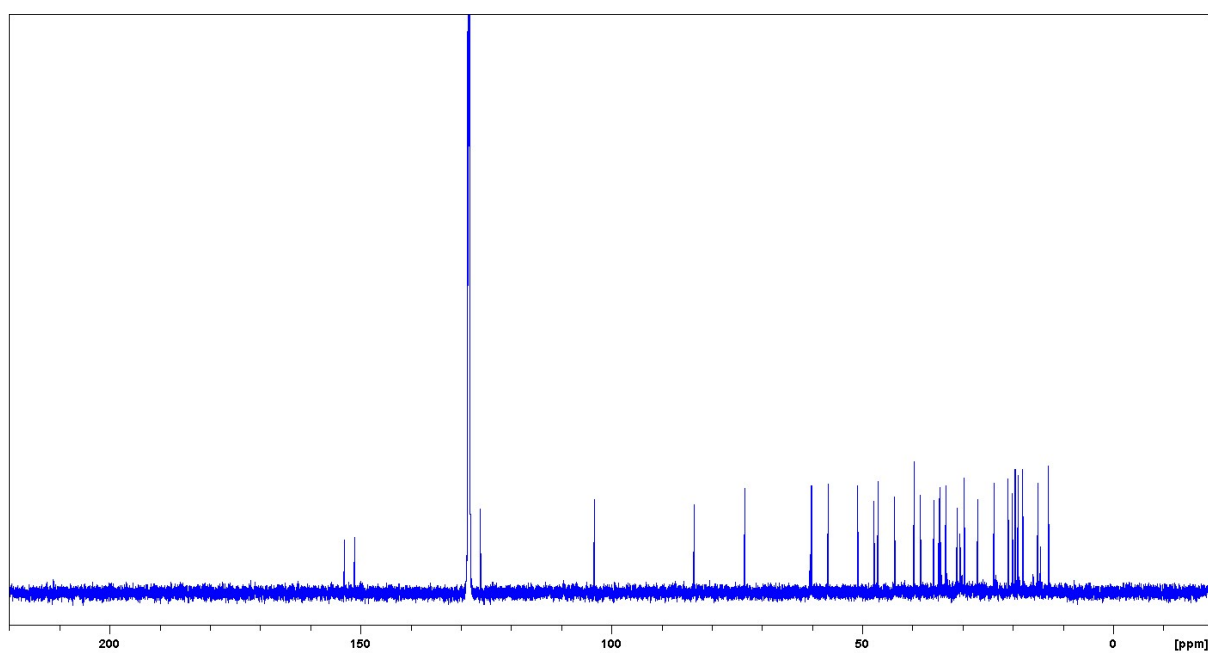

Figure SII-9.  $^{13}\text{C}$  NMR spectrum of compound 2 ( $\text{C}_6\text{D}_6$ , 150 MHz).



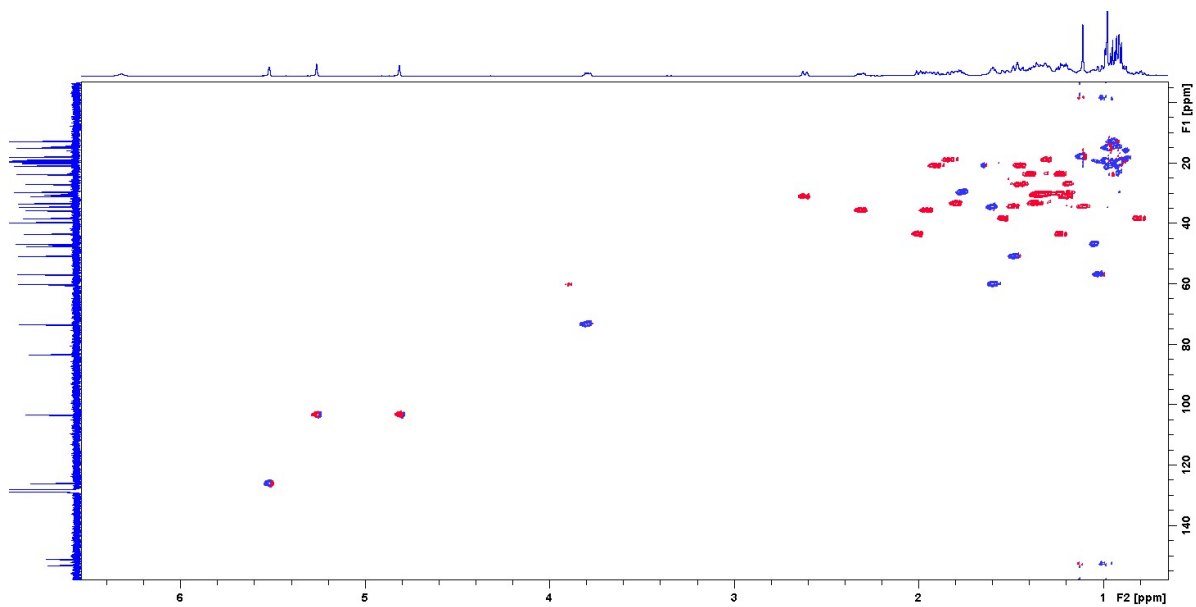

**Figure SII-10.** HSQC spectrum of compound **2** (C<sub>6</sub>D<sub>6</sub>, 600 MHz).

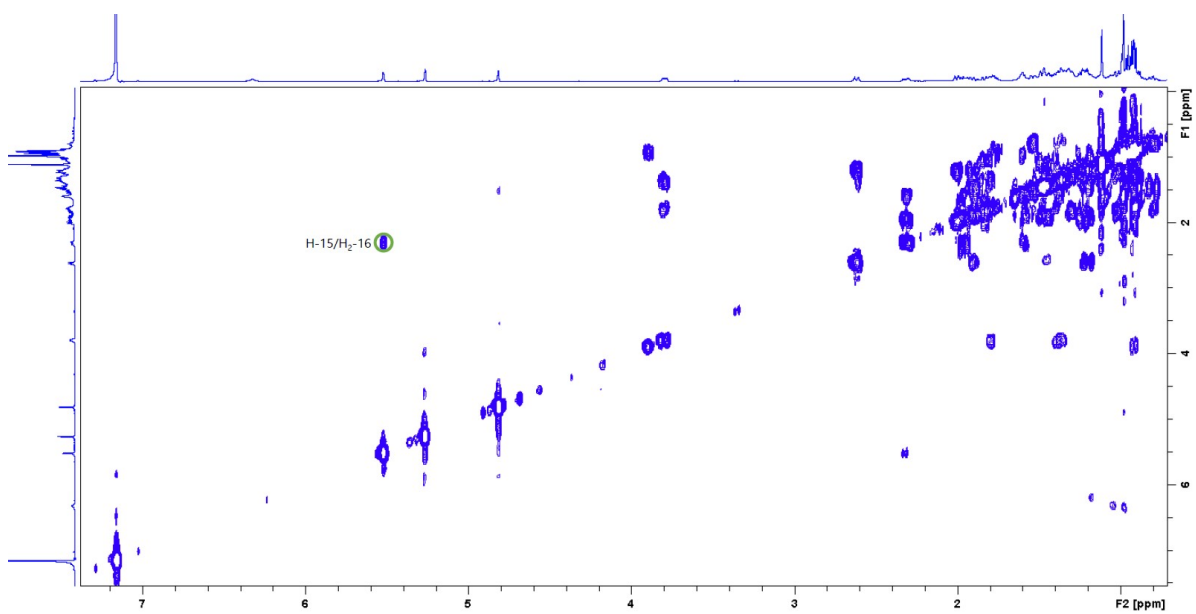

**Figure SII-11.** <sup>1</sup>H-<sup>1</sup>H COSY spectrum of compound **2** (C<sub>6</sub>D<sub>6</sub>, 600 MHz).

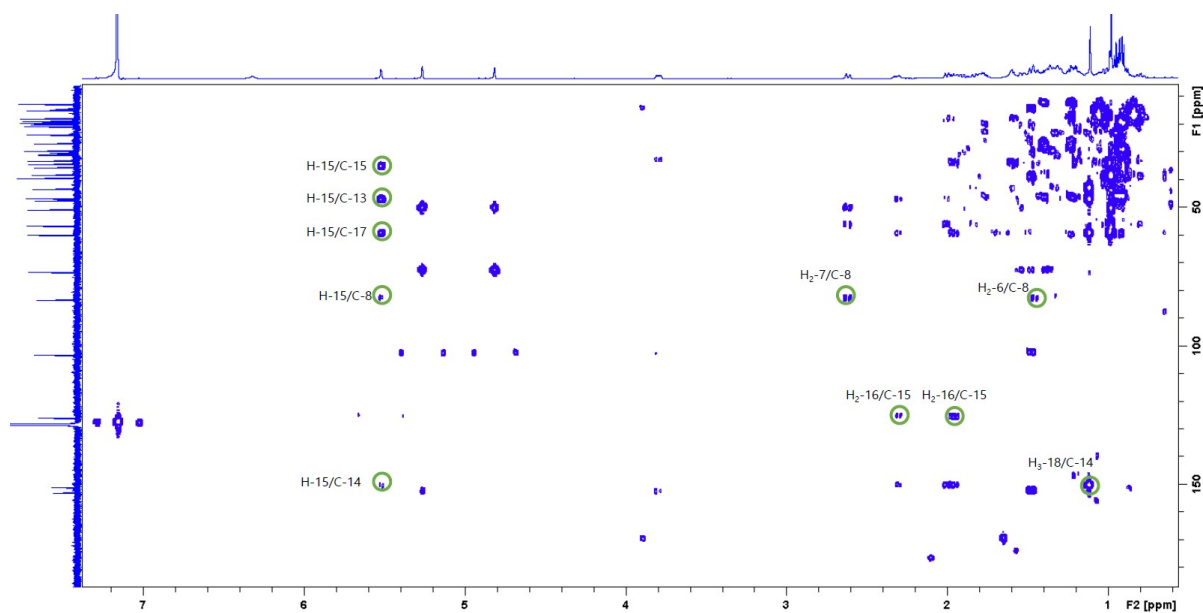

**Figure SII-12.** HMBC spectrum of compound 2 ( $C_6D_6$ , 600 MHz).

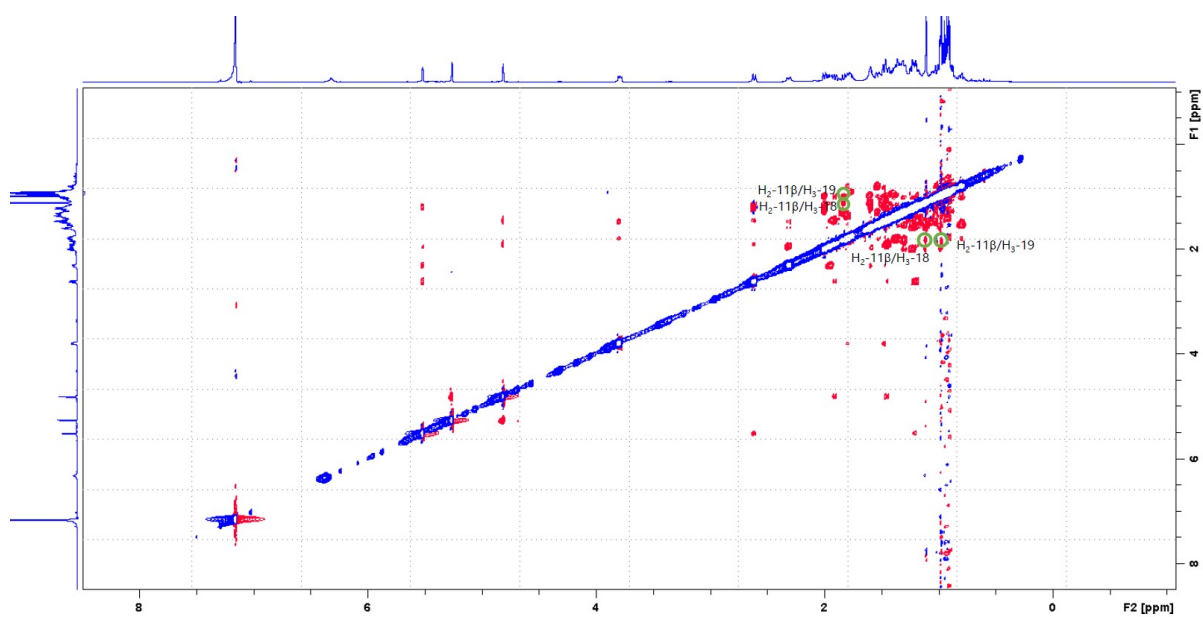

**Figure SII-13.** NOESY spectrum of compound 2 ( $C_6D_6$ , 600 MHz).

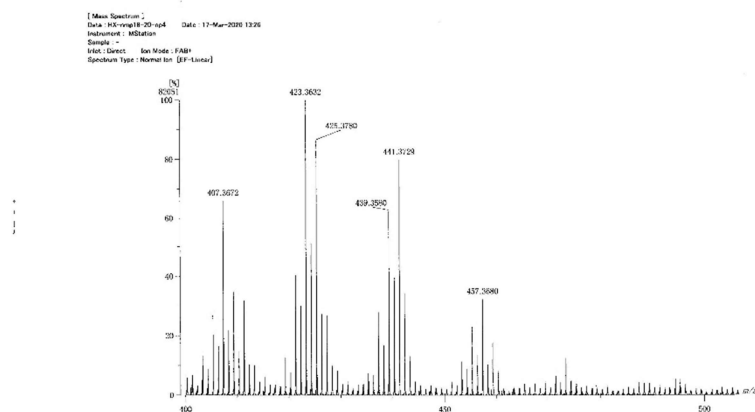

**Figure SII-14.** HRMS spectrum of compound **2**.

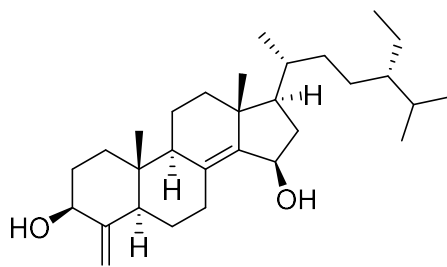

**3**

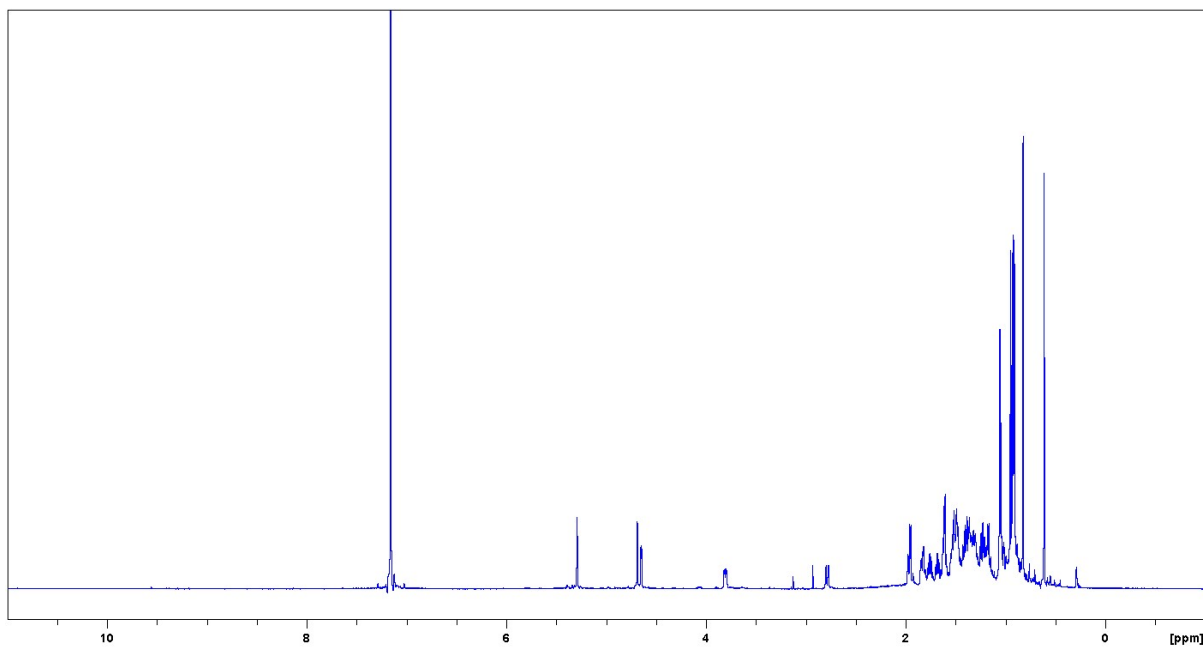

**Figure SII-15.**  $^1\text{H}$  NMR spectrum of compound **3** ( $\text{CDCl}_3$ , 600 MHz).

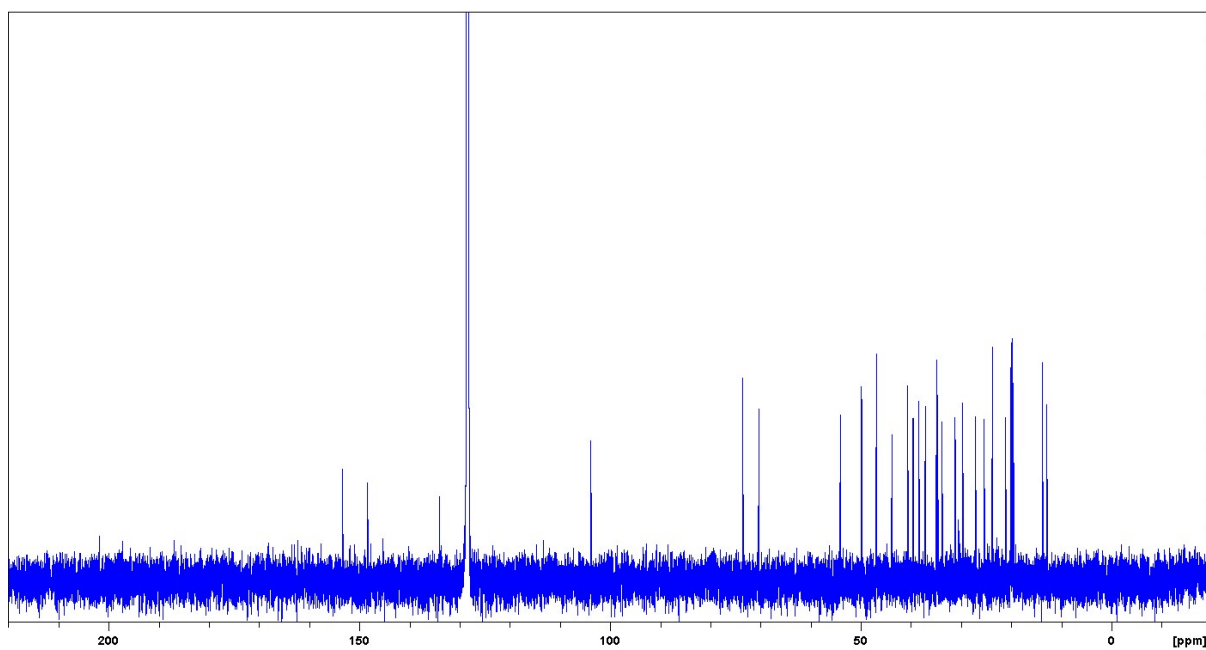

**Figure SII-16.**  $^{13}\text{C}$  NMR spectrum of compound **3** ( $\text{CDCl}_3$ , 150 MHz).

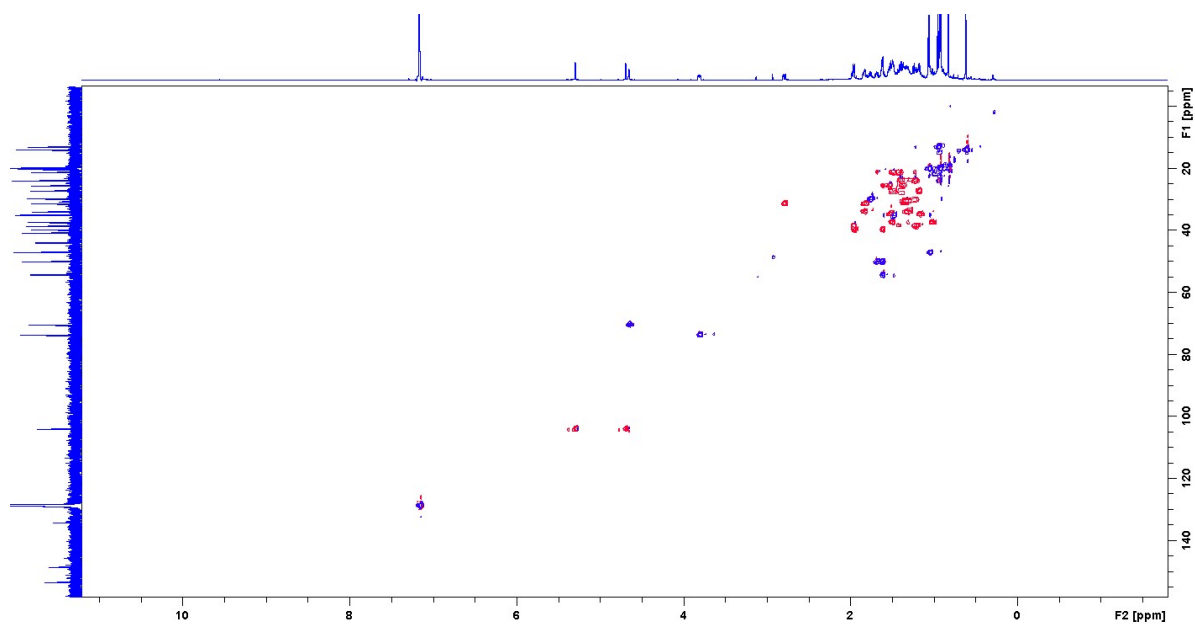

**Figure SII-17.** HSQC spectrum of compound **3** ( $\text{C}_6\text{D}_6$ , 600 MHz).

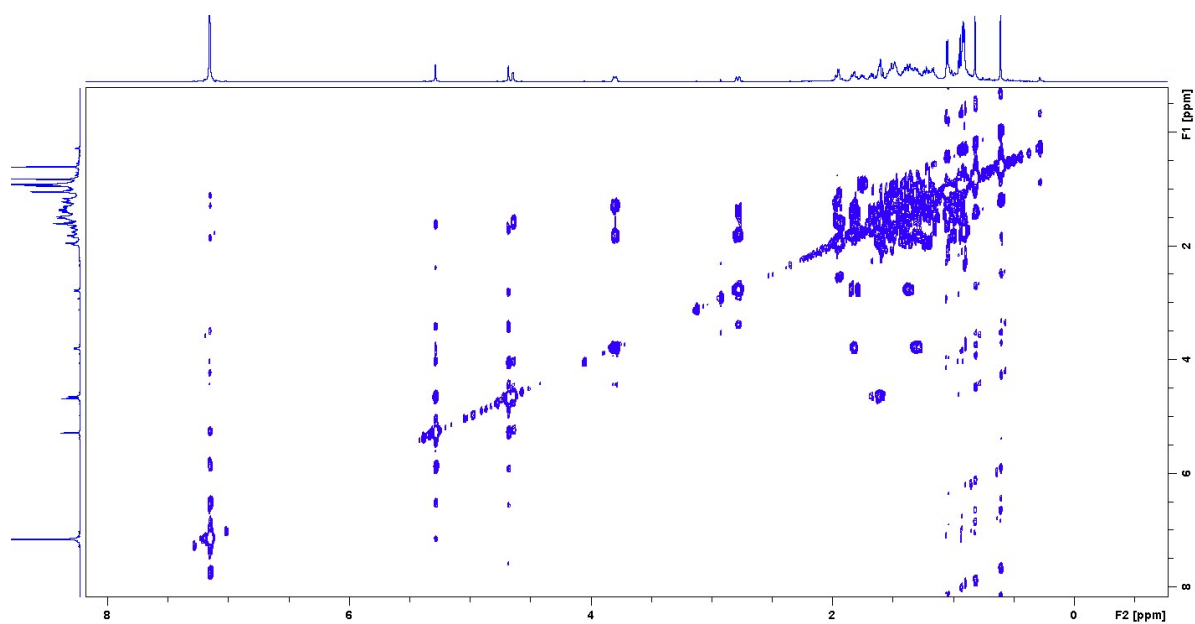

**Figure SII-18.**  $^1\text{H}$ - $^1\text{H}$  COSY spectrum of compound **3** ( $\text{C}_6\text{D}_6$ , 600 MHz).

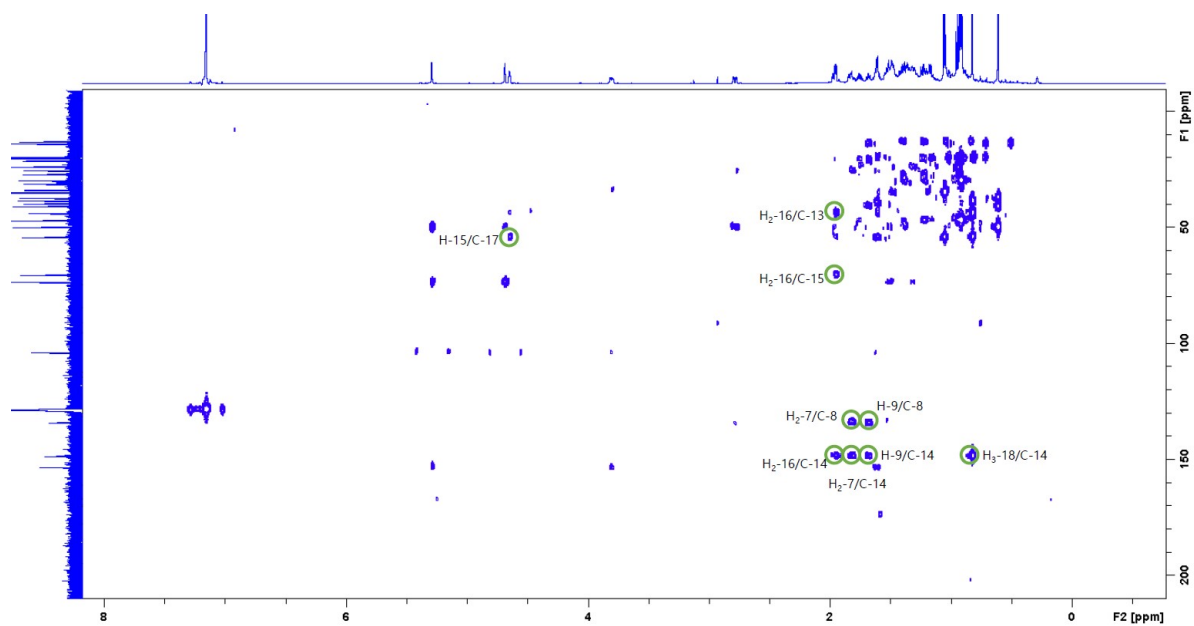

**Figure SII-19.** HMBC spectrum of compound **3** ( $\text{C}_6\text{D}_6$ , 600 MHz).

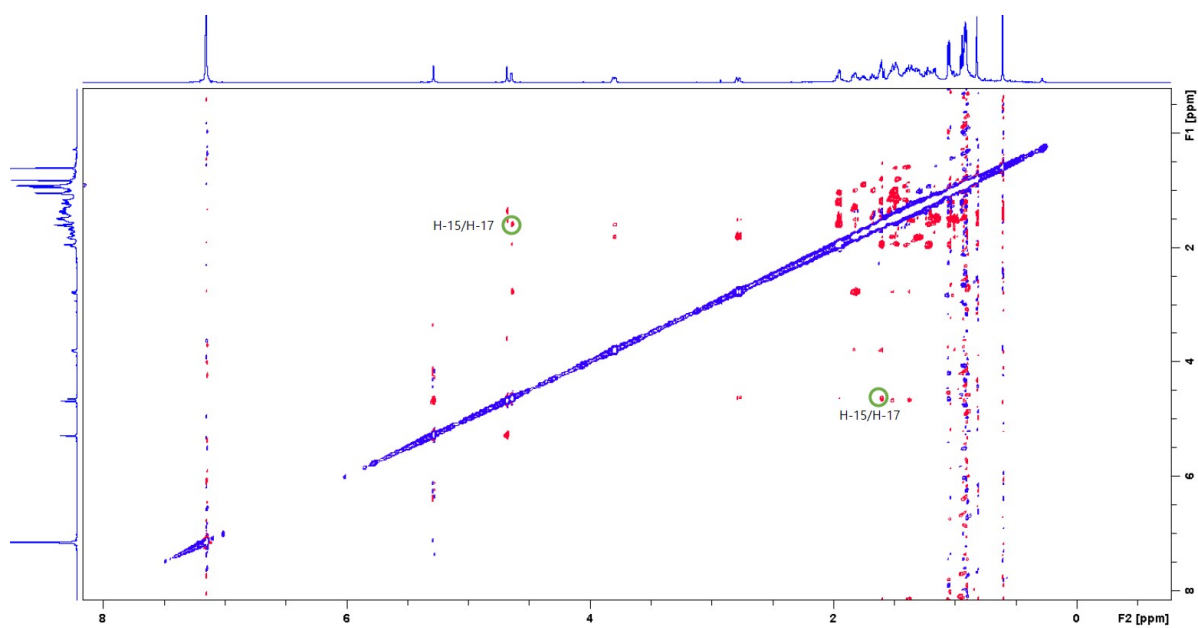

**Figure SII-20.** NOESY spectrum of compound **3** ( $\text{C}_6\text{D}_6$ , 600 MHz).

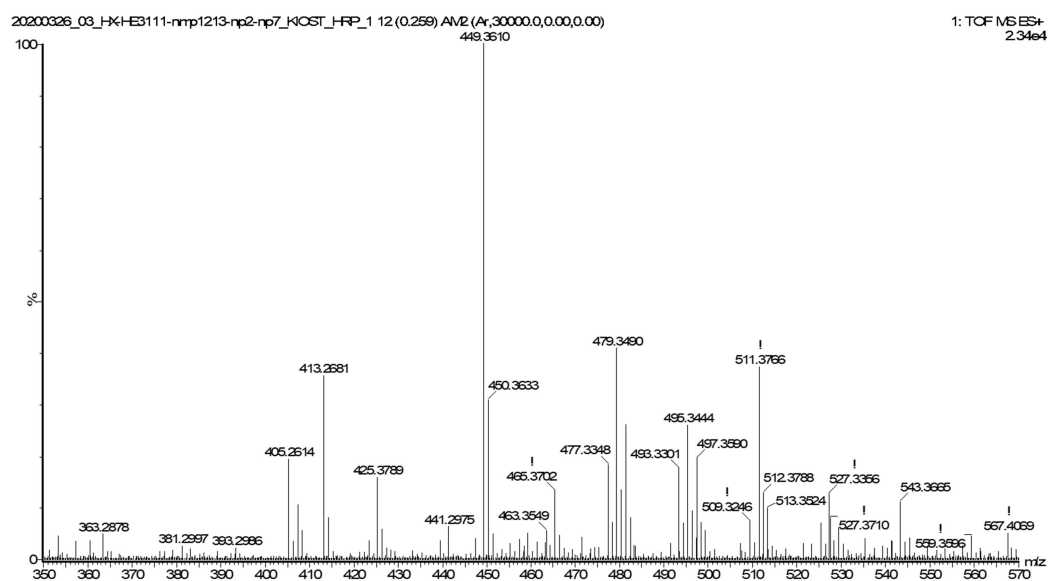

**Figure SII-21.** HRMS spectrum of compound **3**.

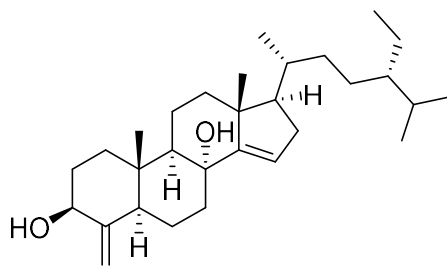

**4**

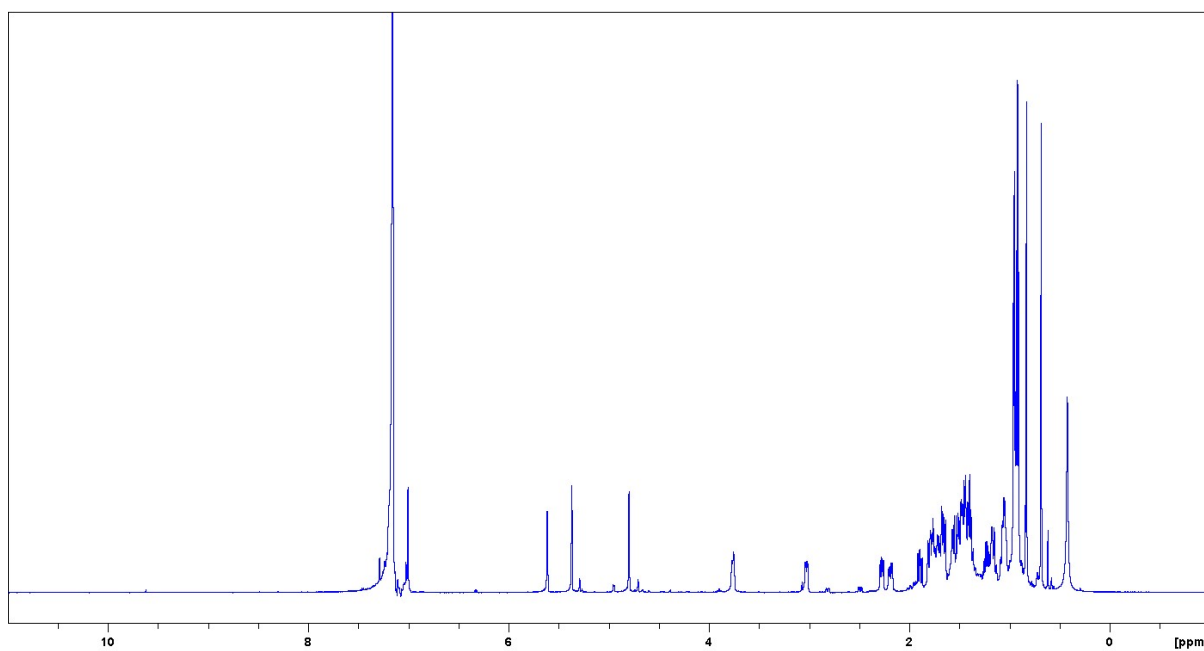

**Figure SII-22.**  $^1\text{H}$  NMR spectrum of compound **4** ( $\text{C}_6\text{D}_6$ , 600 MHz).

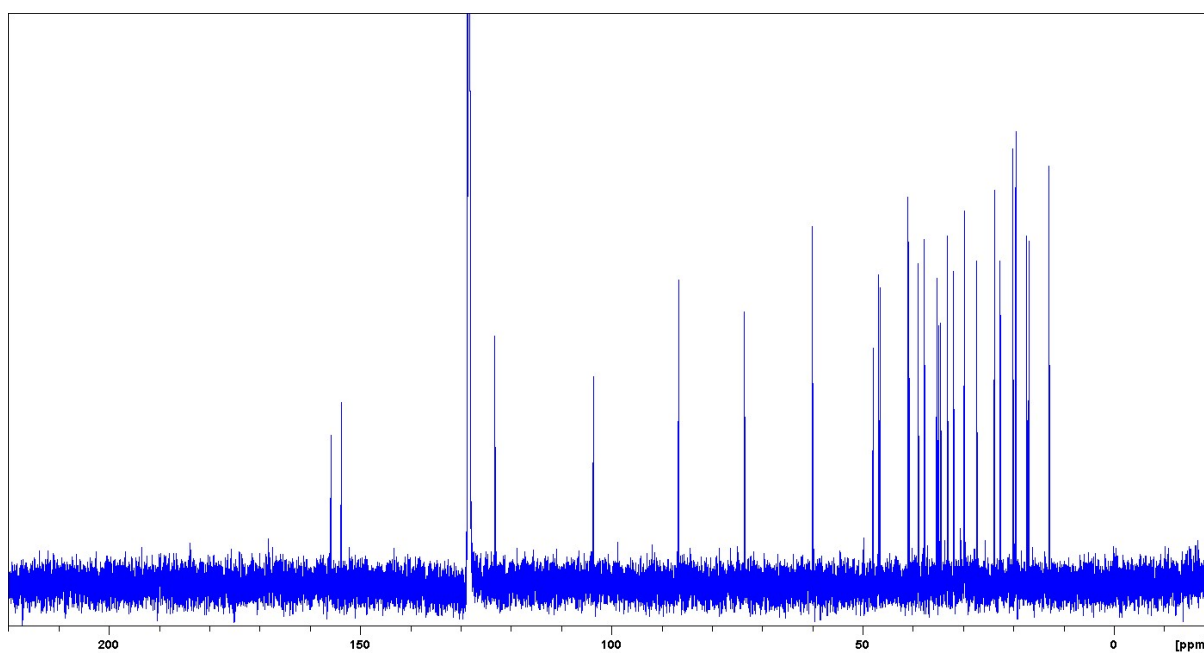

**Figure SII-23.**  $^{13}\text{C}$  NMR spectrum of compound **4** ( $\text{C}_6\text{D}_6$ , 150 MHz).



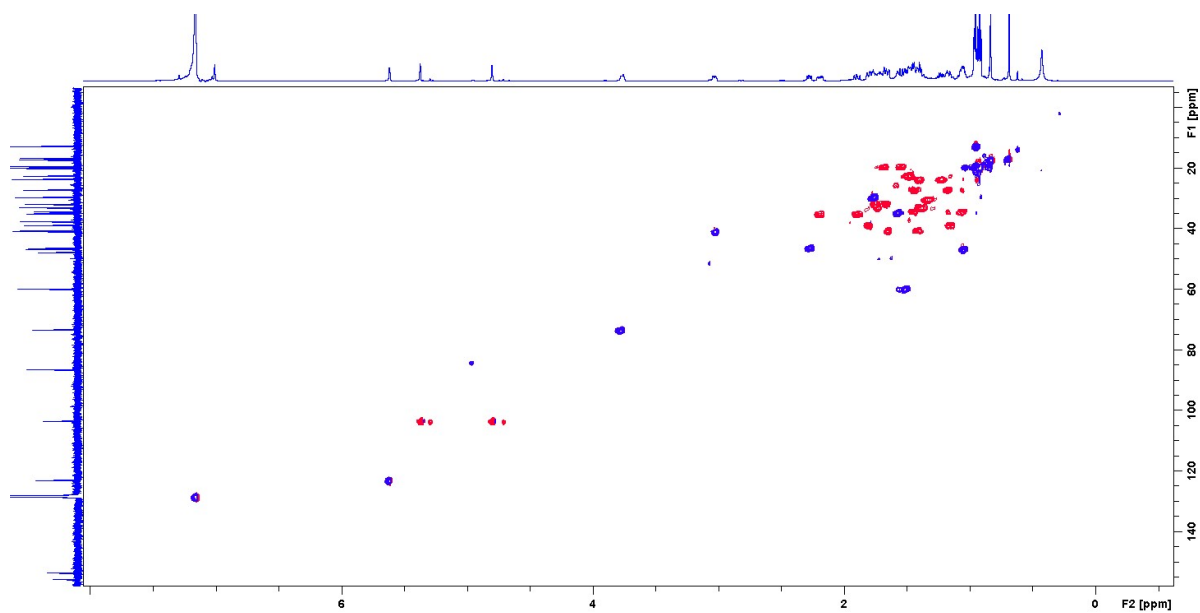

**Figure SII-24.** HSQC spectrum of compound **4** ( $\text{C}_6\text{D}_6$ , 600 MHz).

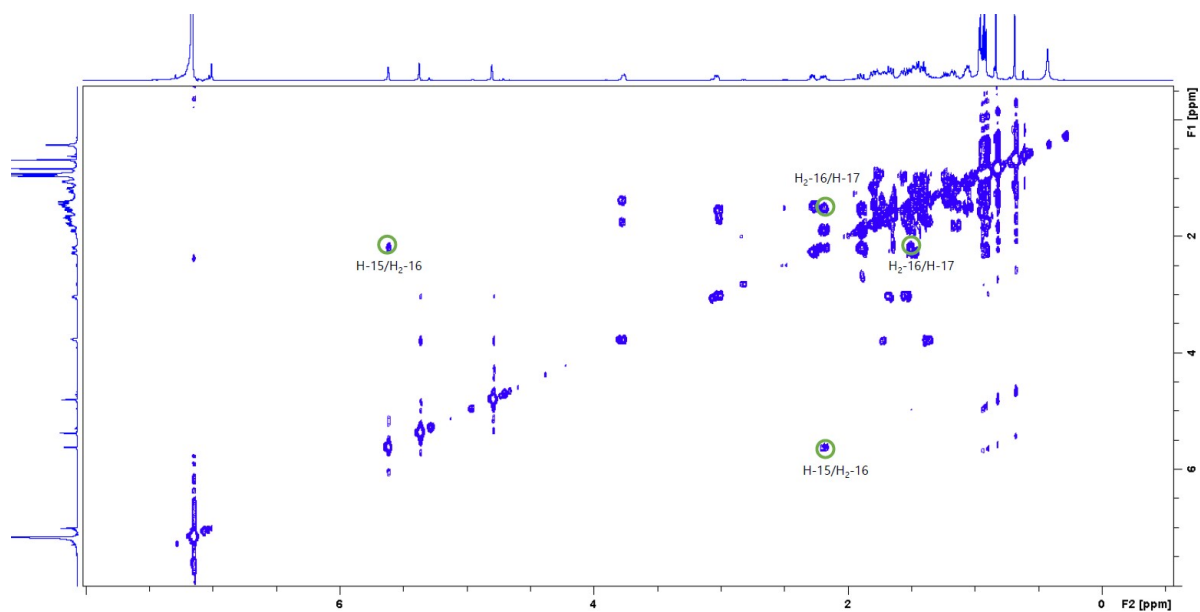

**Figure SII-25.**  $^1\text{H}$ - $^1\text{H}$  COSY spectrum of compound **4** ( $\text{C}_6\text{D}_6$ , 600 MHz).

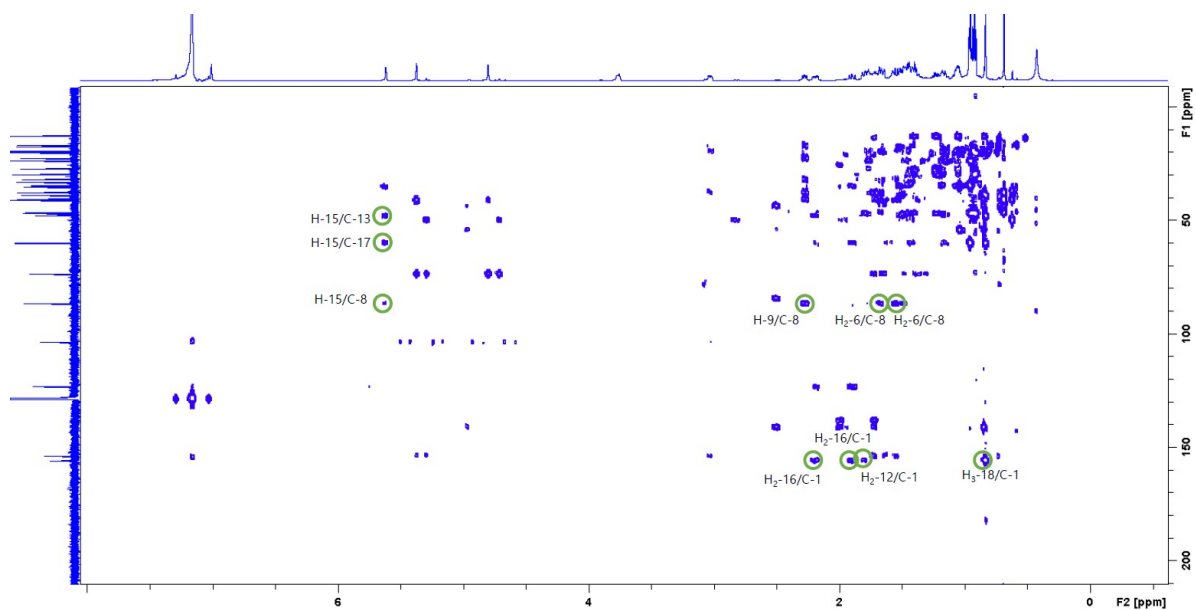

**Figure SII-26.** HMBC spectrum of compound **4** ( $\text{C}_6\text{D}_6$ , 600 MHz).

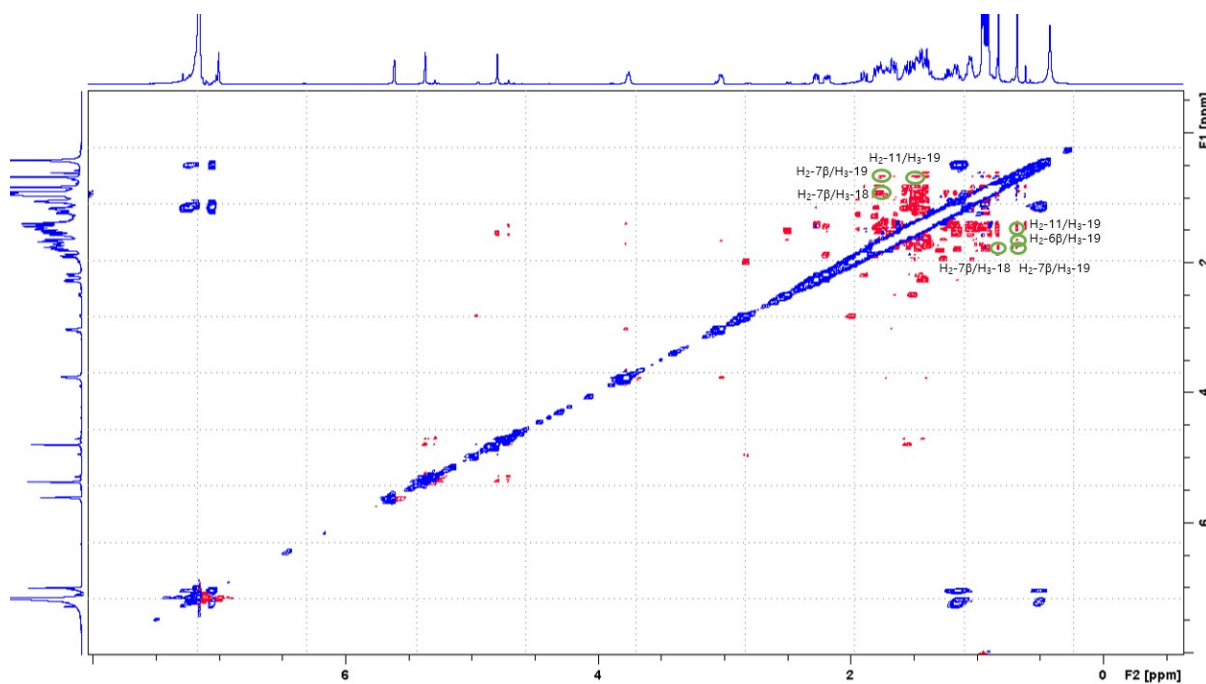

**Figure SII-27.** NOESY spectrum of compound **4** ( $\text{C}_6\text{D}_6$ , 600 MHz).

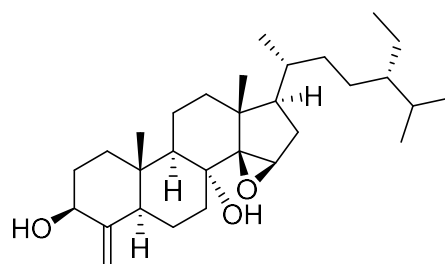

**5**

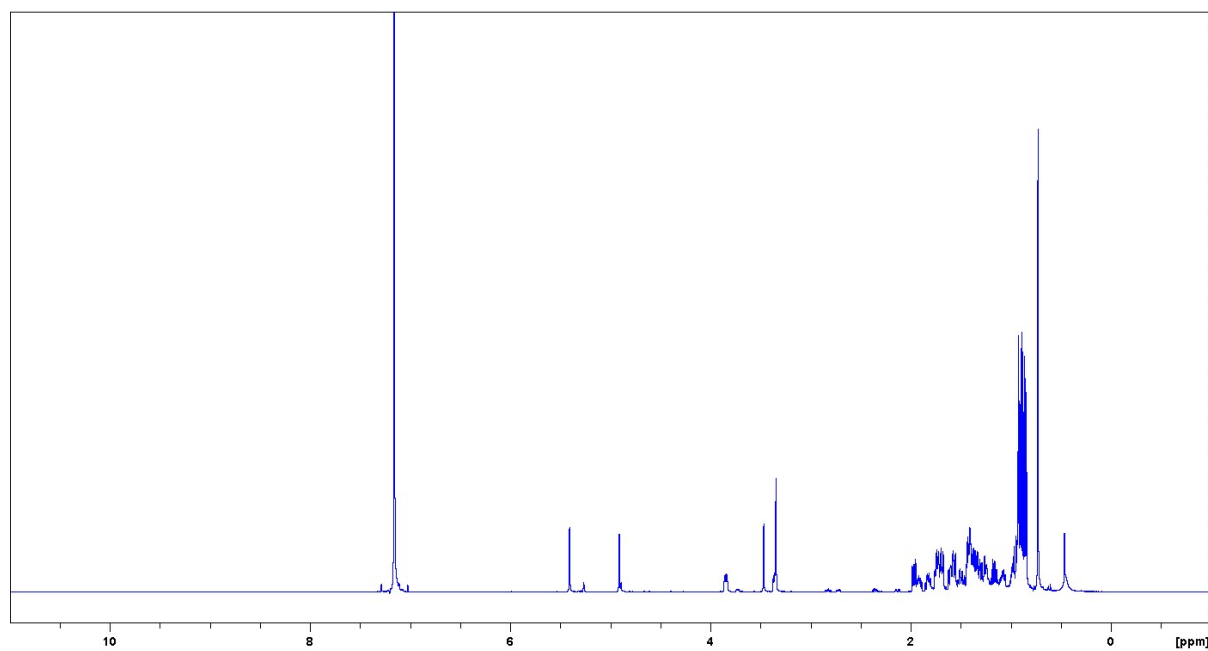

**Figure SII-28.**  $^1\text{H}$  NMR spectrum of compound **5** ( $\text{C}_6\text{D}_6$ , 600 MHz).

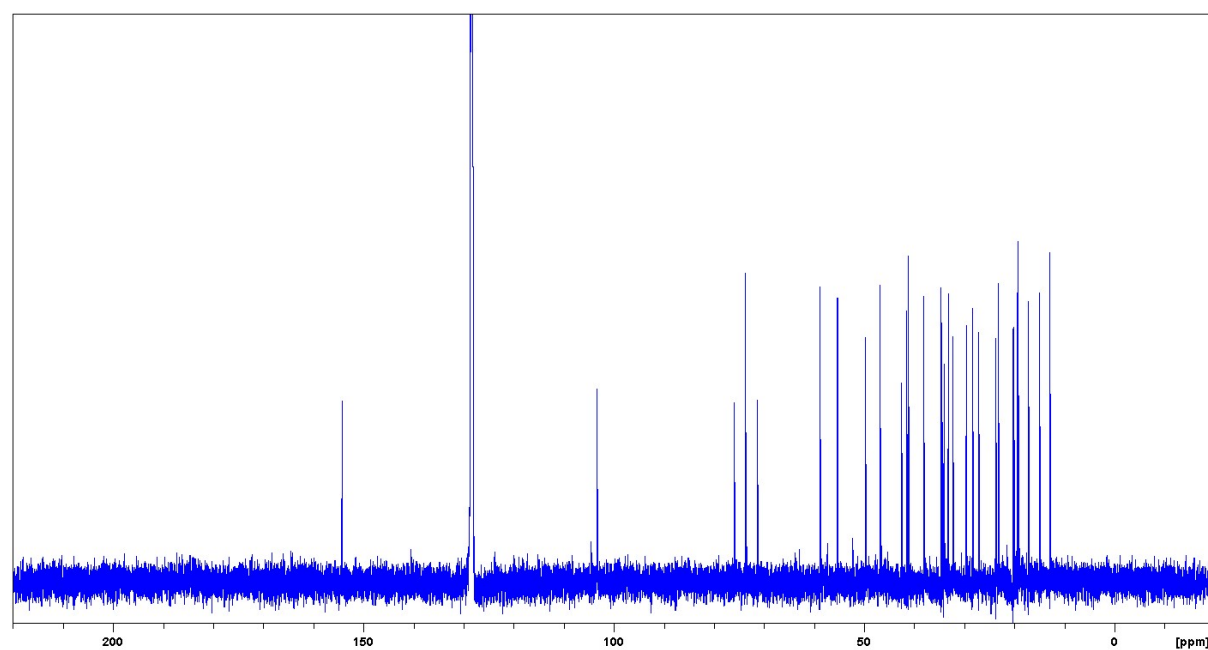

**Figure SII-29.**  $^{13}\text{C}$  NMR spectrum of compound **5** ( $\text{C}_6\text{D}_6$ , 150 MHz).

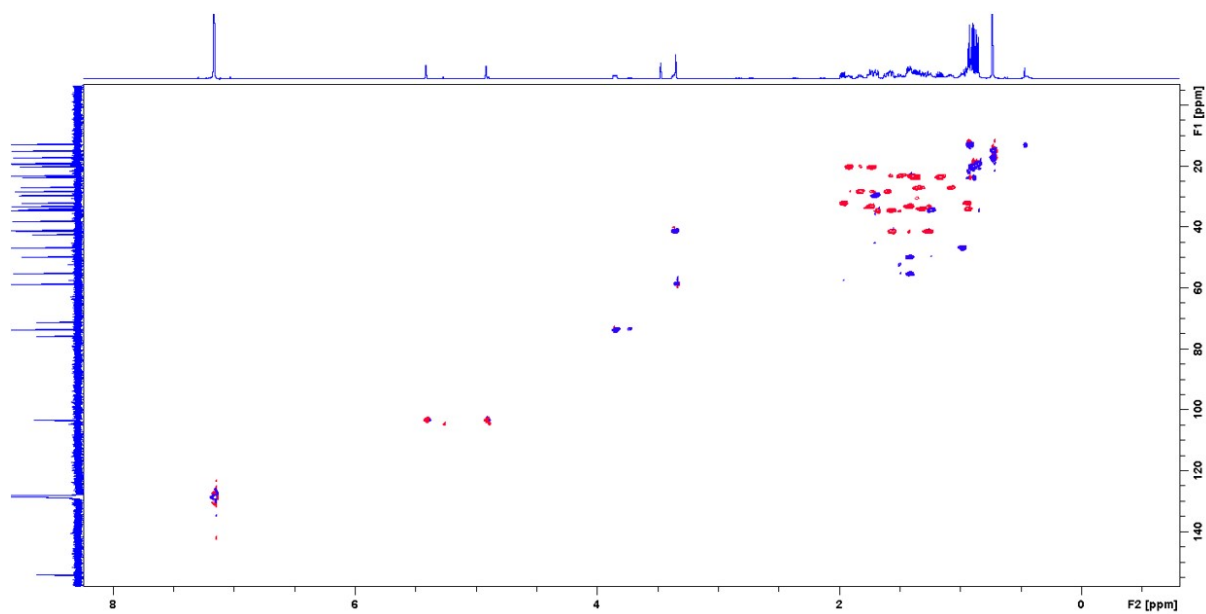

**Figure SII-30.** HSQC spectrum of compound **5** ( $\text{C}_6\text{D}_6$ , 600 MHz).

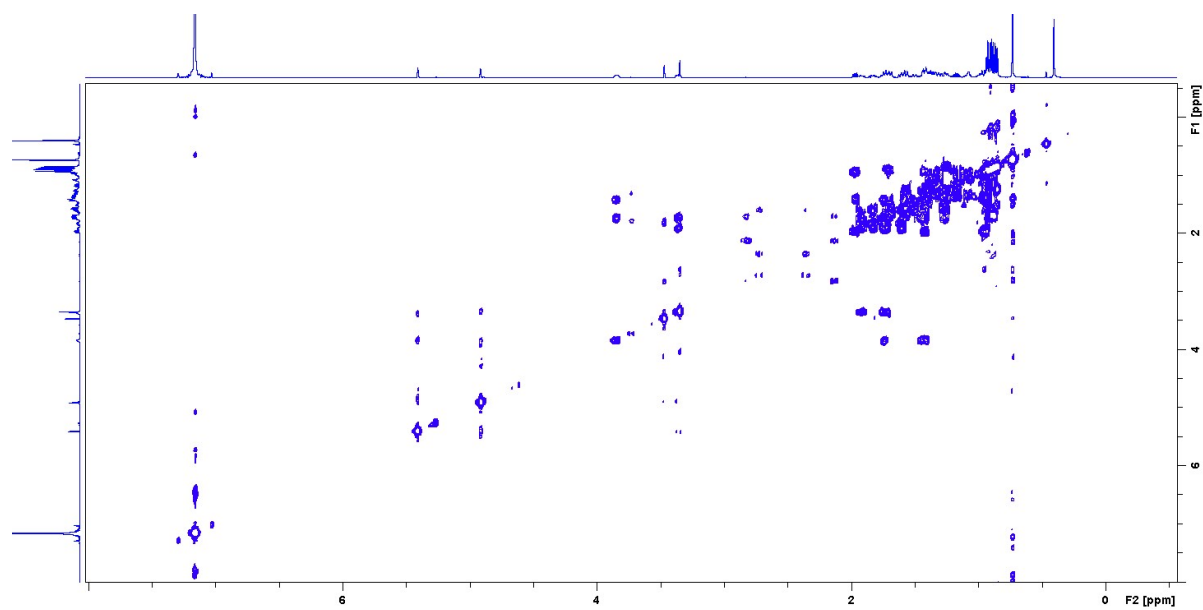

**Figure SII-31.**  $^1\text{H}$ - $^1\text{H}$  COSY spectrum of compound **5** ( $\text{C}_6\text{D}_6$ , 600 MHz).

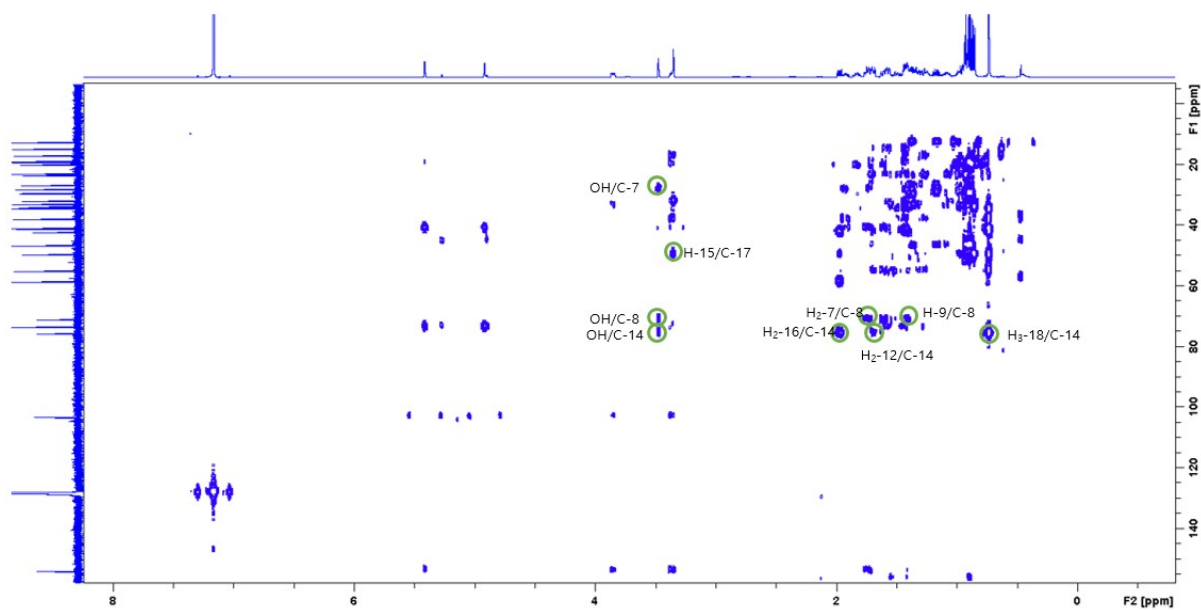

**Figure SII-32.** HMBC spectrum of compound **5** ( $C_6D_6$ , 600 MHz).

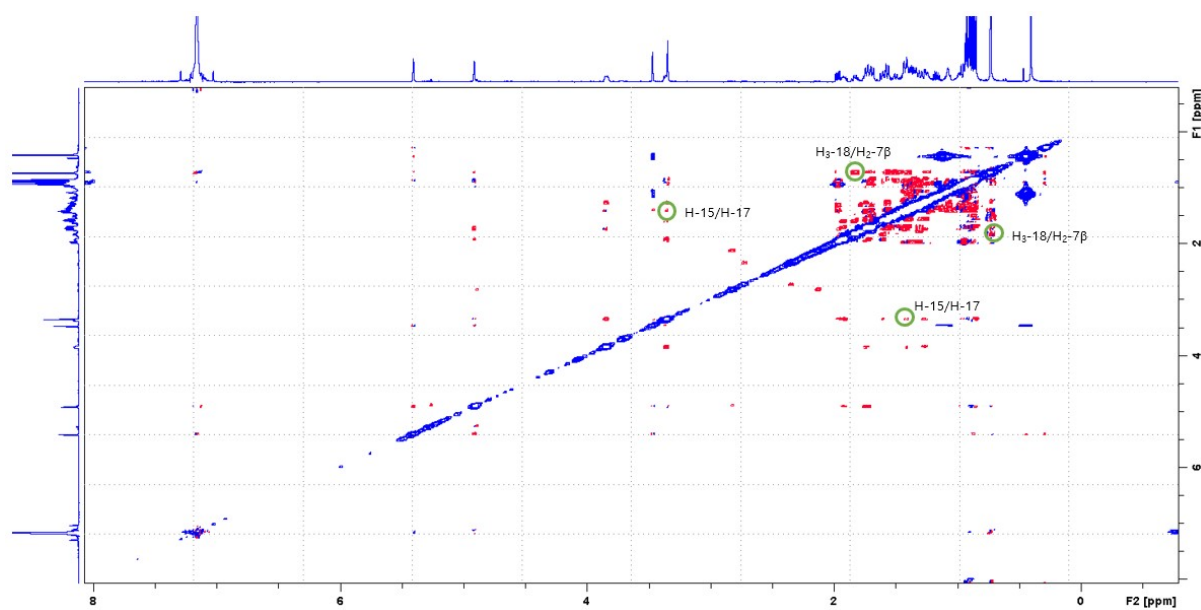

**Figure SII-33.** NOESY spectrum of compound **5** ( $C_6D_6$ , 600 MHz).

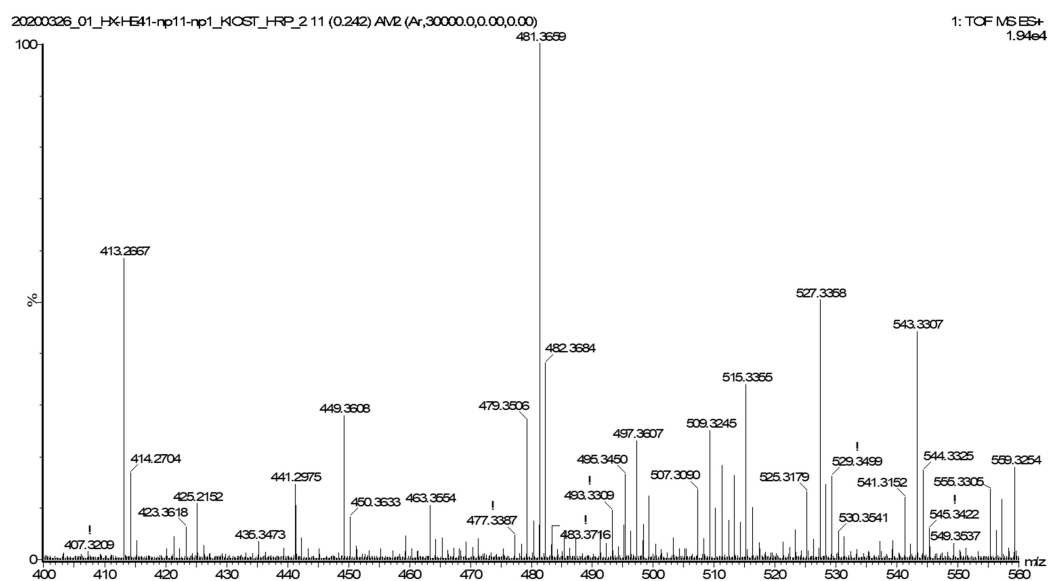

**Figure SII-34.** HRMS spectrum of compound **5**.

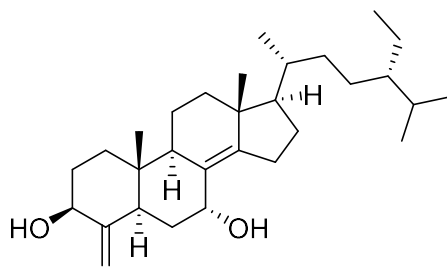

**6**

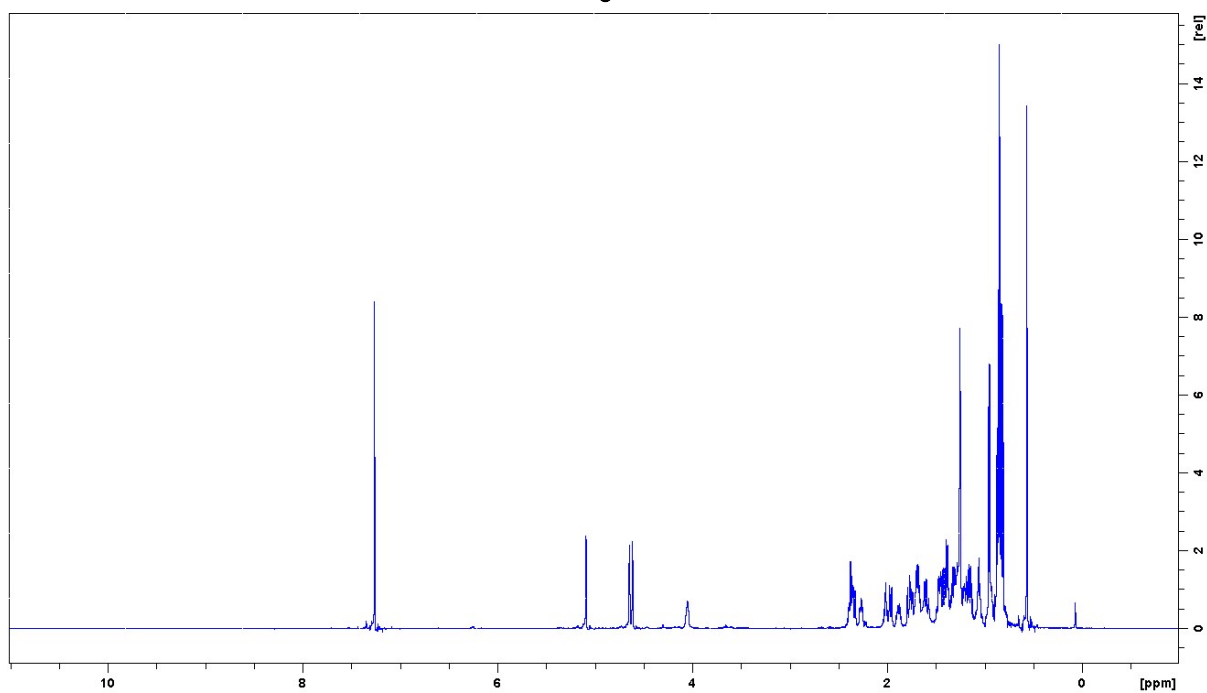

**Figure SII-35.**  $^1\text{H}$  NMR spectrum of compound **6** ( $\text{CDCl}_3$ , 600 MHz).

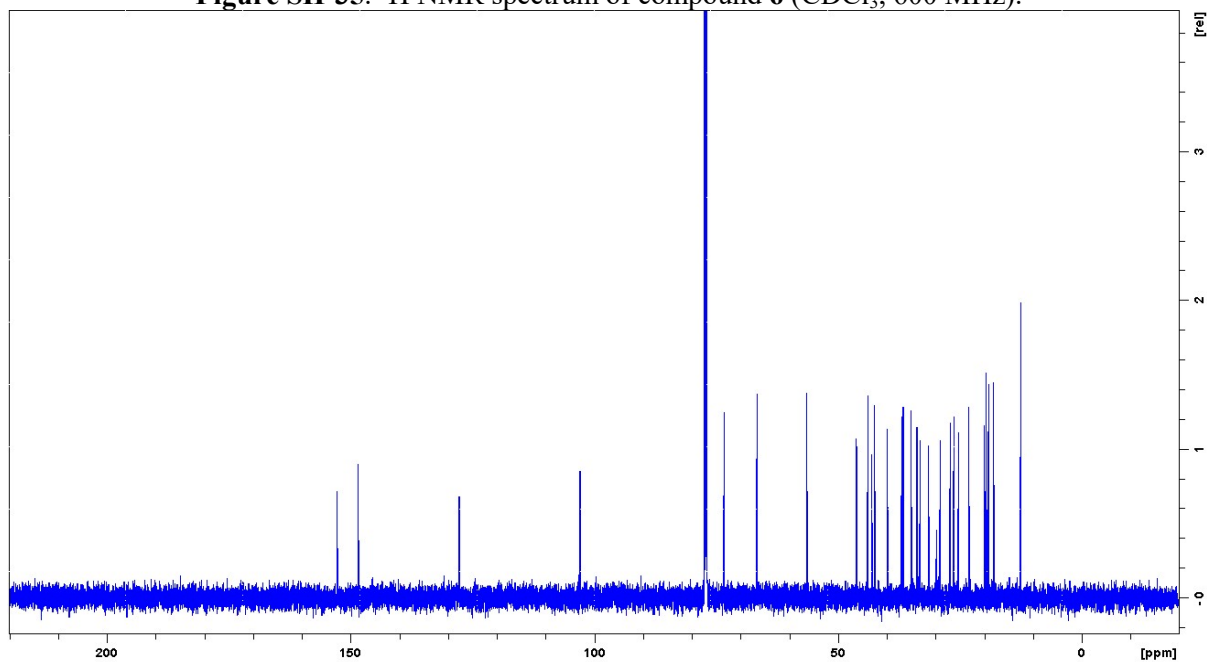

**Figure SII-36.**  $^{13}\text{C}$  NMR spectrum of compound **6** ( $\text{CDCl}_3$ , 150 MHz).

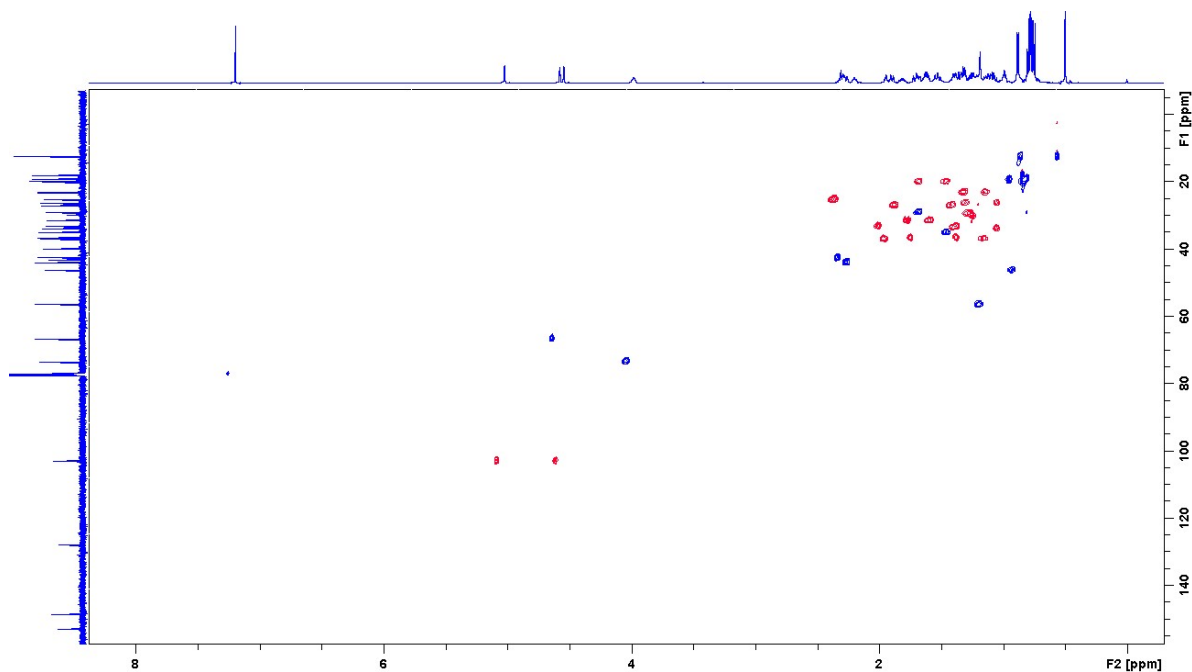

**Figure SII-37.** HSQC spectrum of compound **6** (CDCl<sub>3</sub>, 600 MHz).

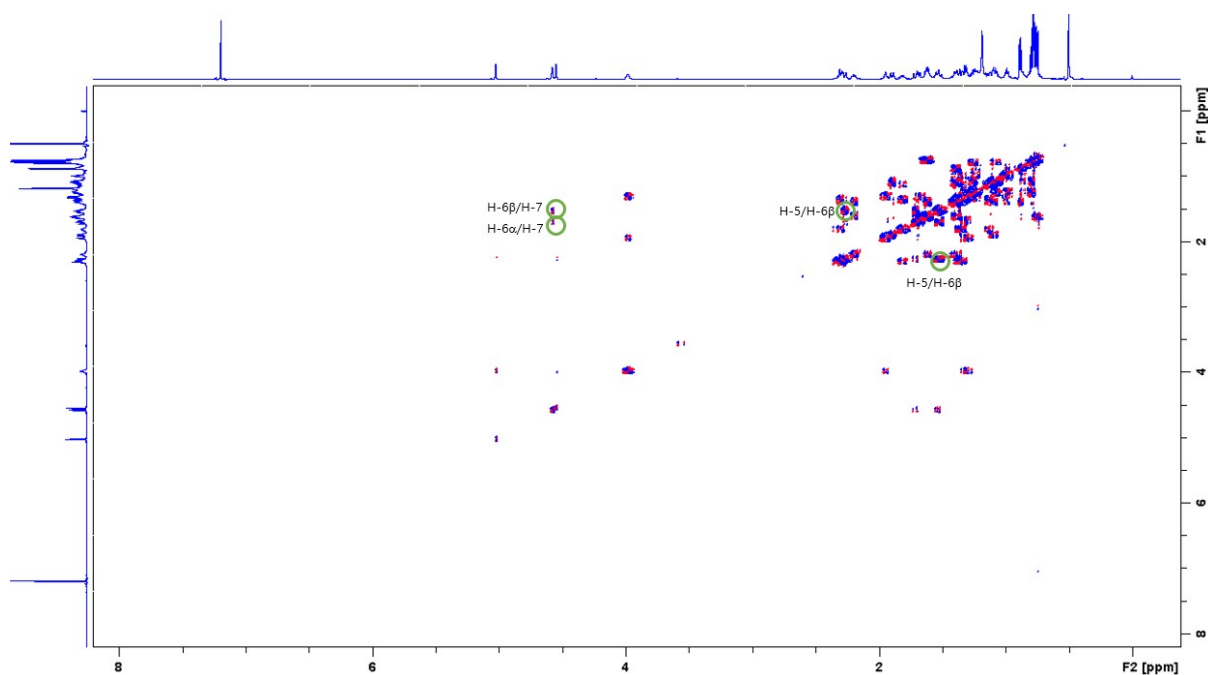

**Figure SII-38.** <sup>1</sup>H-<sup>1</sup>H COSY spectrum of compound **6** (CDCl<sub>3</sub>, 600 MHz).



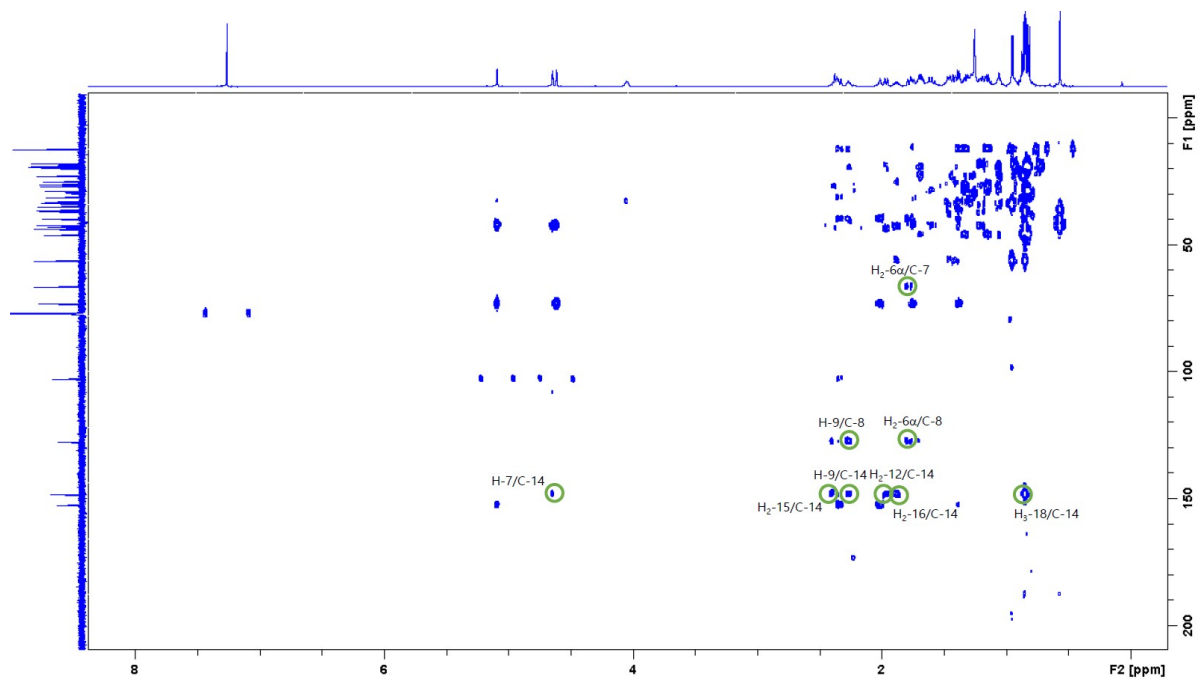

**Figure SII-39.** HMBC spectrum of compound **6** (CDCl<sub>3</sub>, 600 MHz).

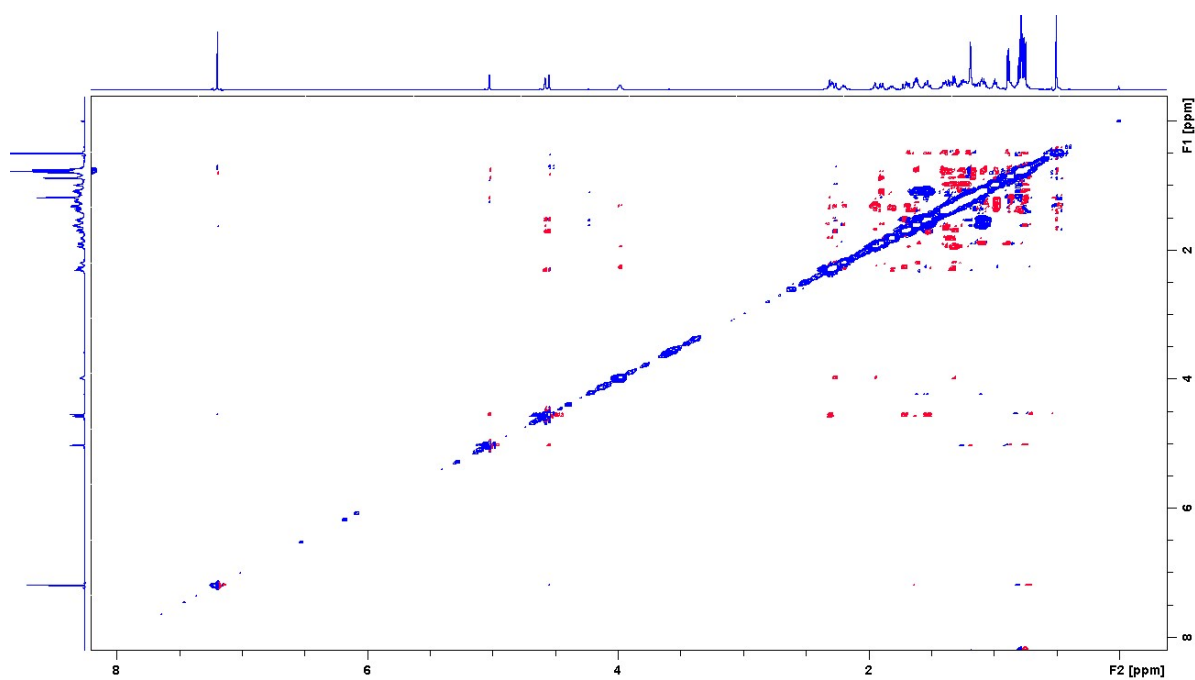

**Figure SII-40.** NOESY spectrum of compound **6** (CDCl<sub>3</sub>, 600 MHz).

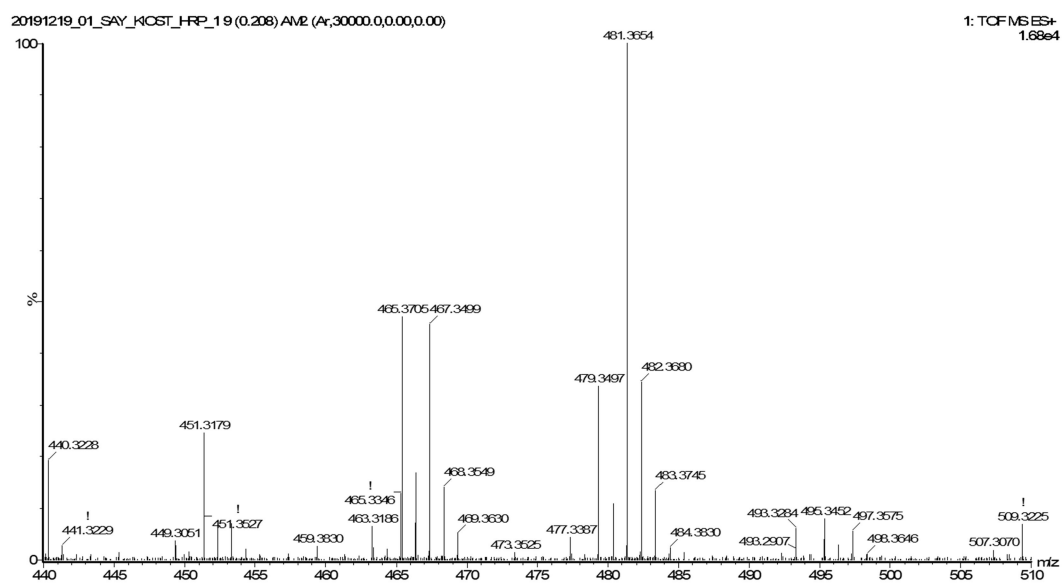

Figure SII-41. HRMS spectrum of compound 6.

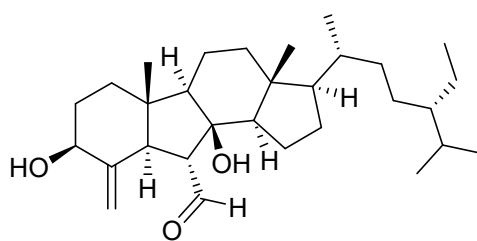

**7**

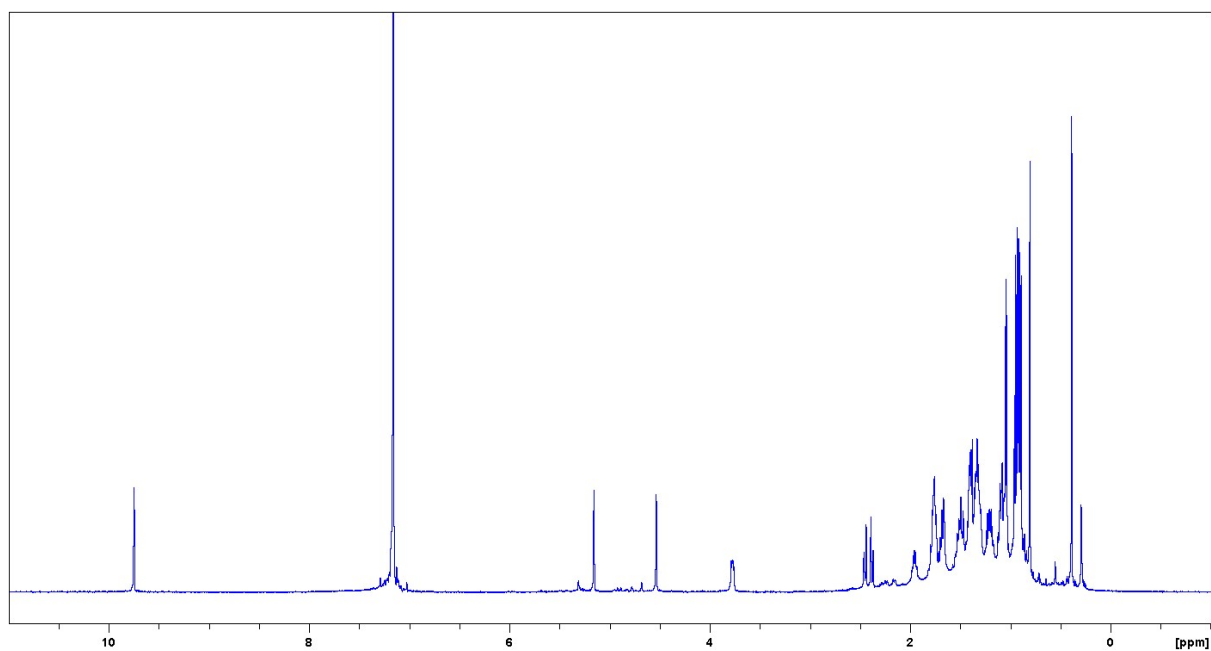

**Figure SII-42.**  $^1\text{H}$  NMR spectrum of compound **7** ( $\text{C}_6\text{D}_6$ , 600 MHz).

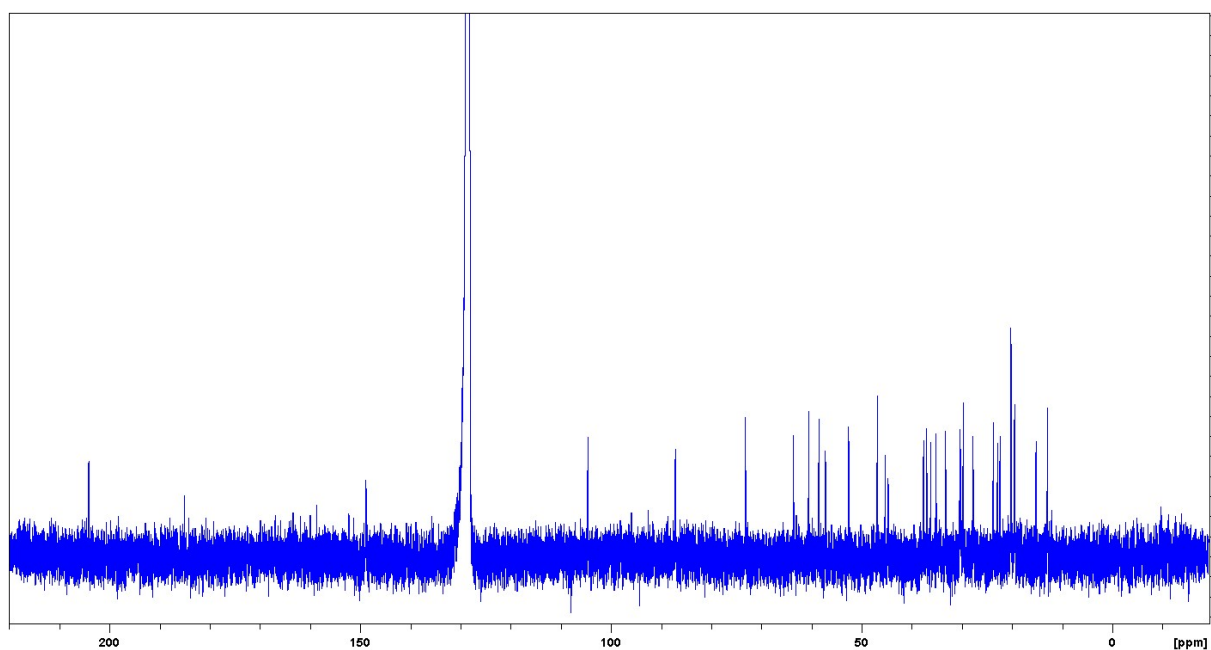

**Figure SII-43.**  $^{13}\text{C}$  NMR spectrum of compound **7** ( $\text{C}_6\text{D}_6$ , 150 MHz).

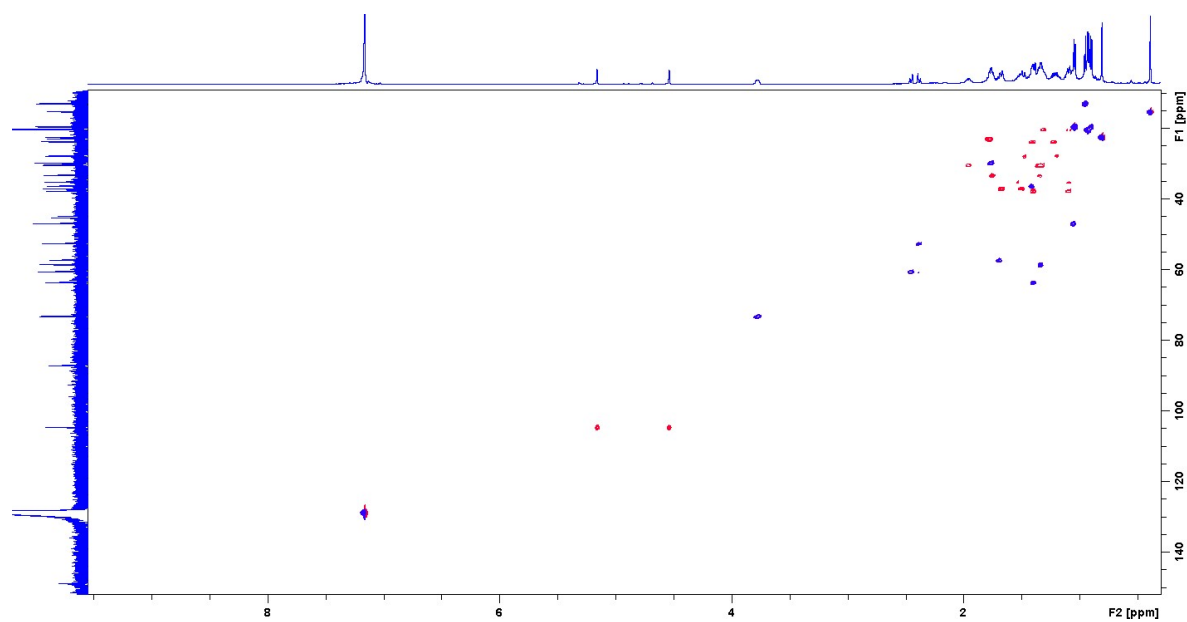

**Figure SII-44.** HSQC spectrum of compound **7** ( $\text{C}_6\text{D}_6$ , 600 MHz).

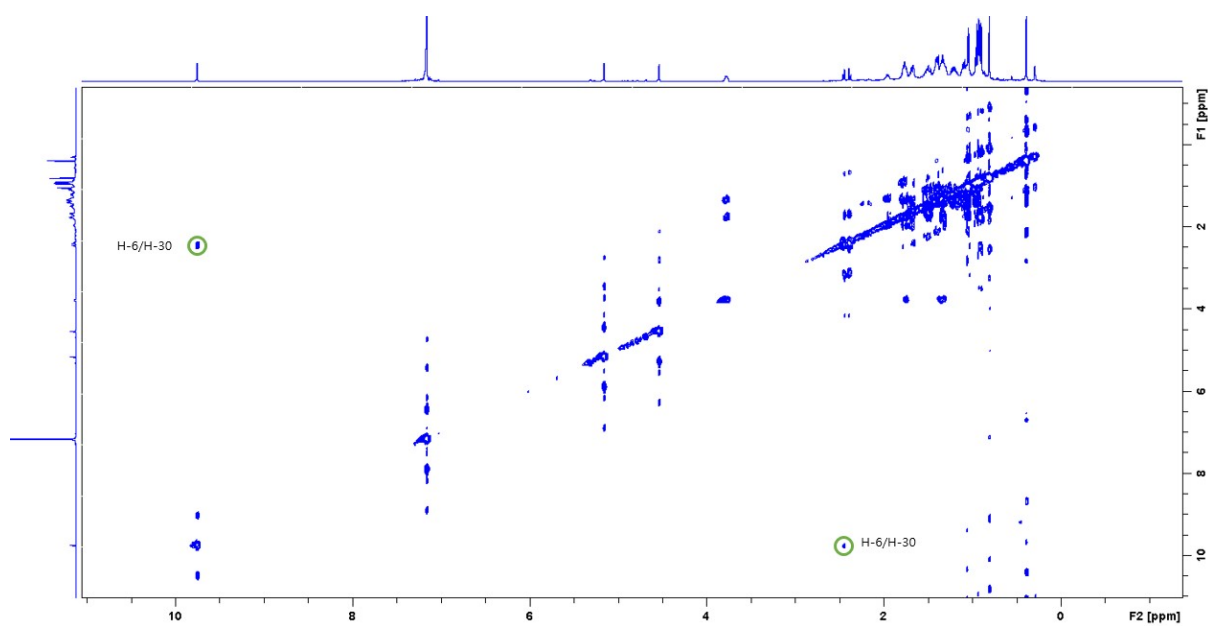

**Figure SII-45.**  $^1\text{H}$ - $^1\text{H}$  COSY spectrum of compound **7** ( $\text{C}_6\text{D}_6$ , 600 MHz).

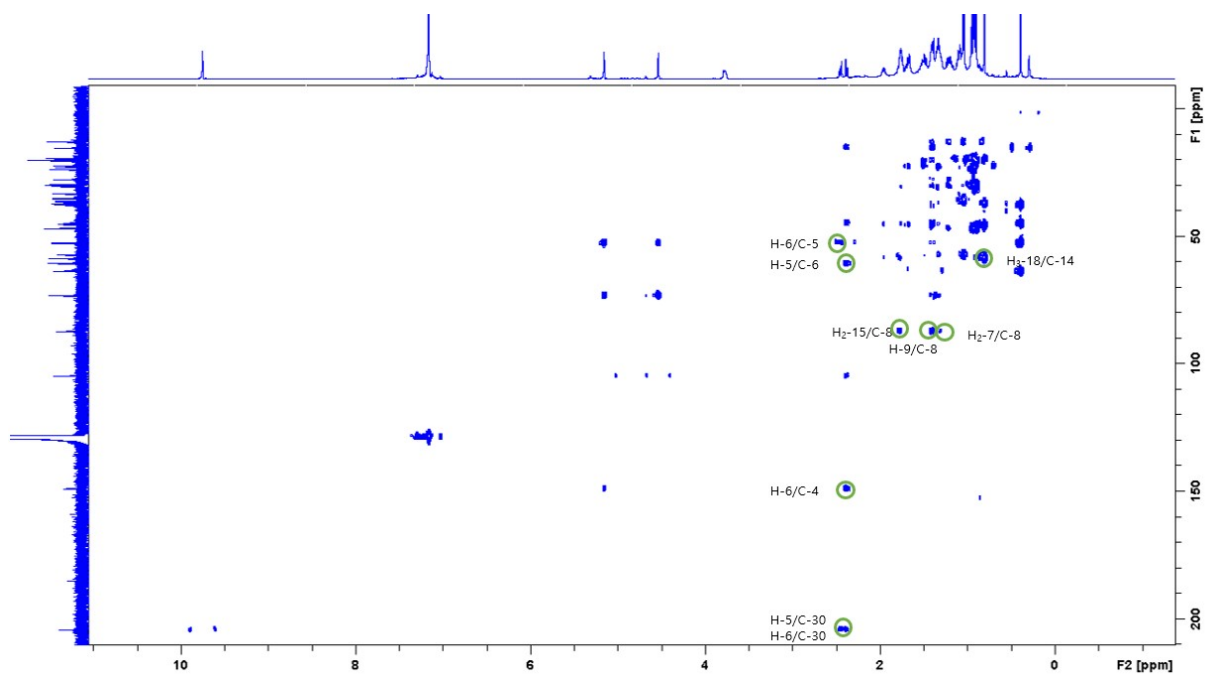

**Figure SII-46.** HMBC spectrum of compound **7** ( $\text{C}_6\text{D}_6$ , 600 MHz).

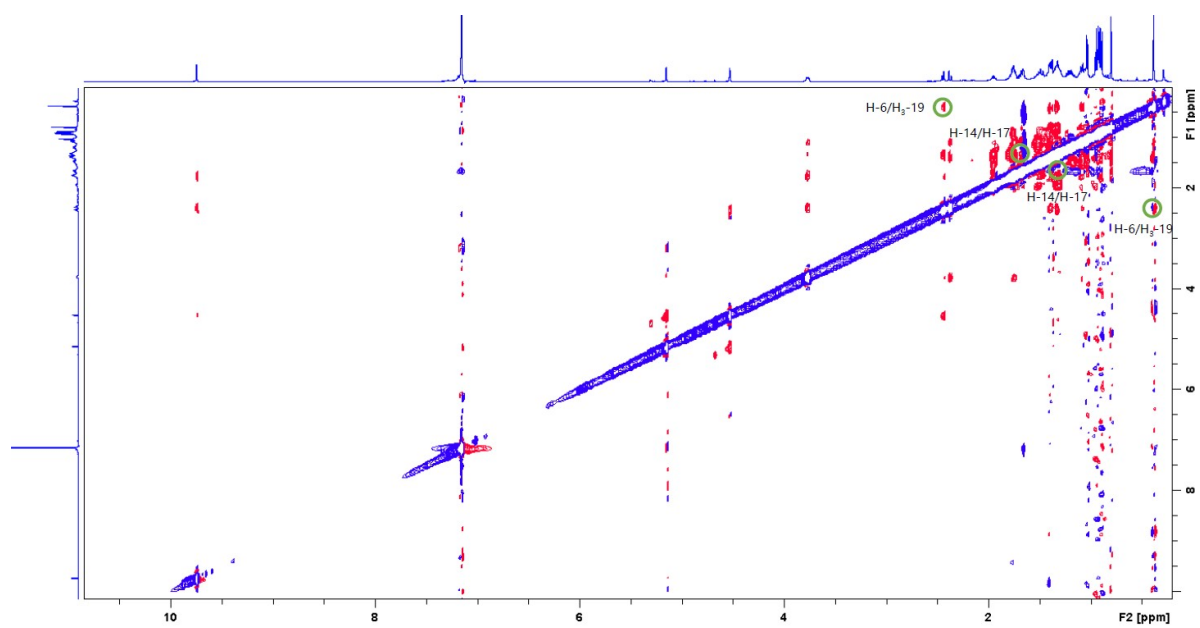

**Figure SII-47.** NOESY spectrum of compound **7** ( $\text{C}_6\text{D}_6$ , 600 MHz).

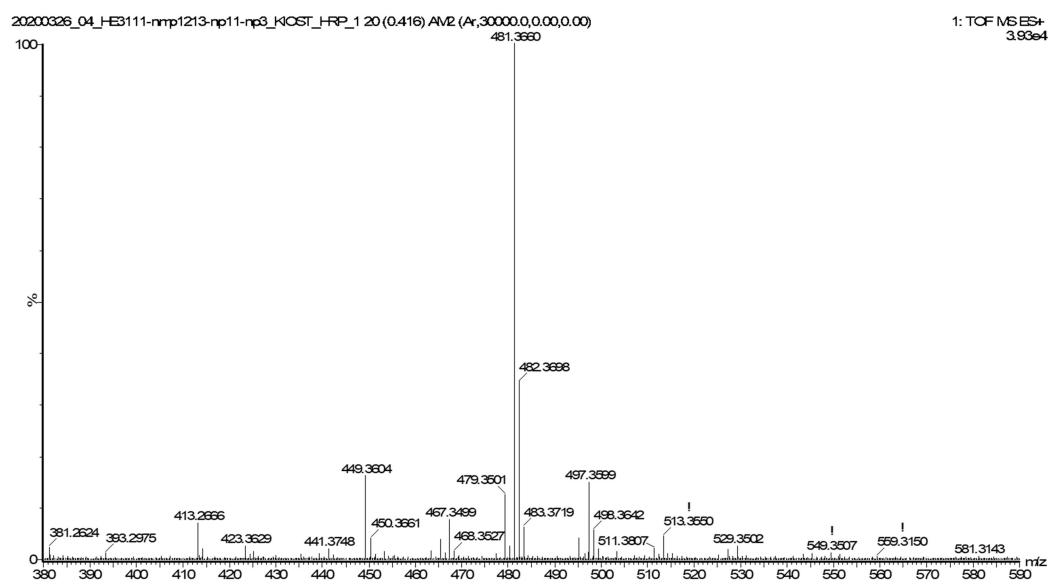

**Figure SII-48.** HRMS spectrum of compound **7**.

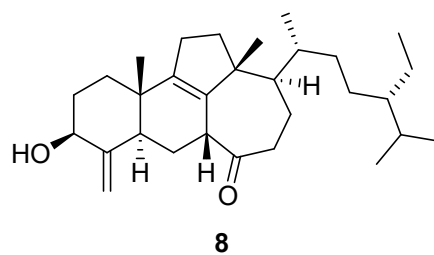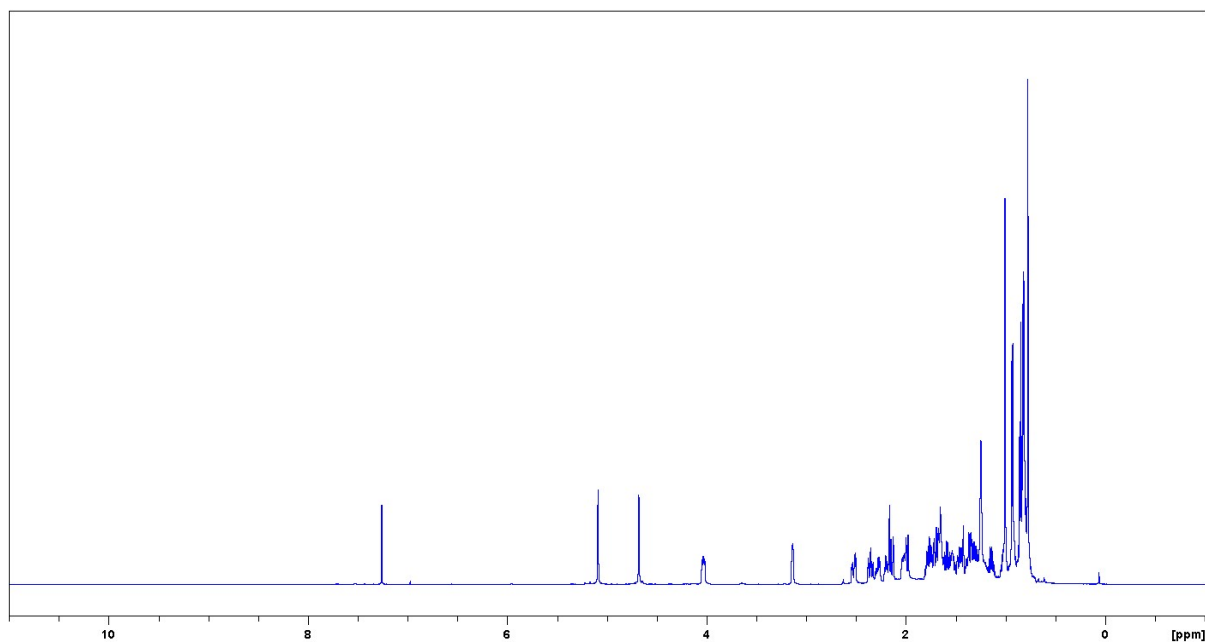

**Figure SII-49.**  $^1\text{H}$  NMR spectrum of compound **8** ( $\text{CDCl}_3$ , 600 MHz).

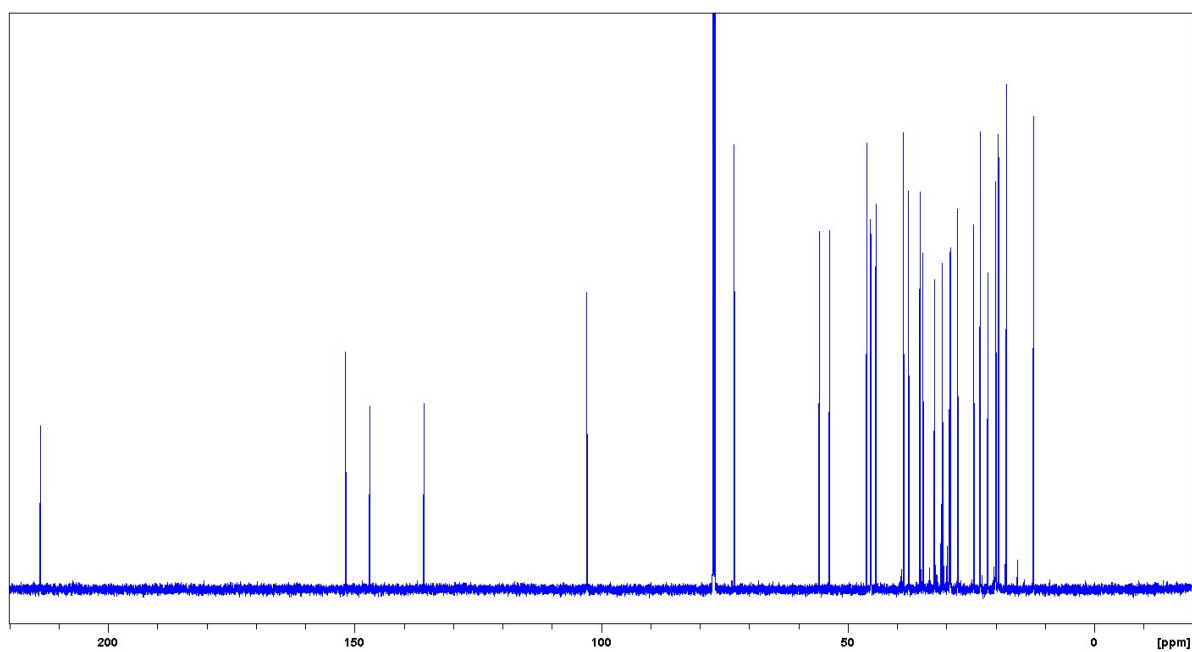

**Figure SII-50.**  $^{13}\text{C}$  NMR spectrum of compound **8** ( $\text{CDCl}_3$ , 150 MHz).

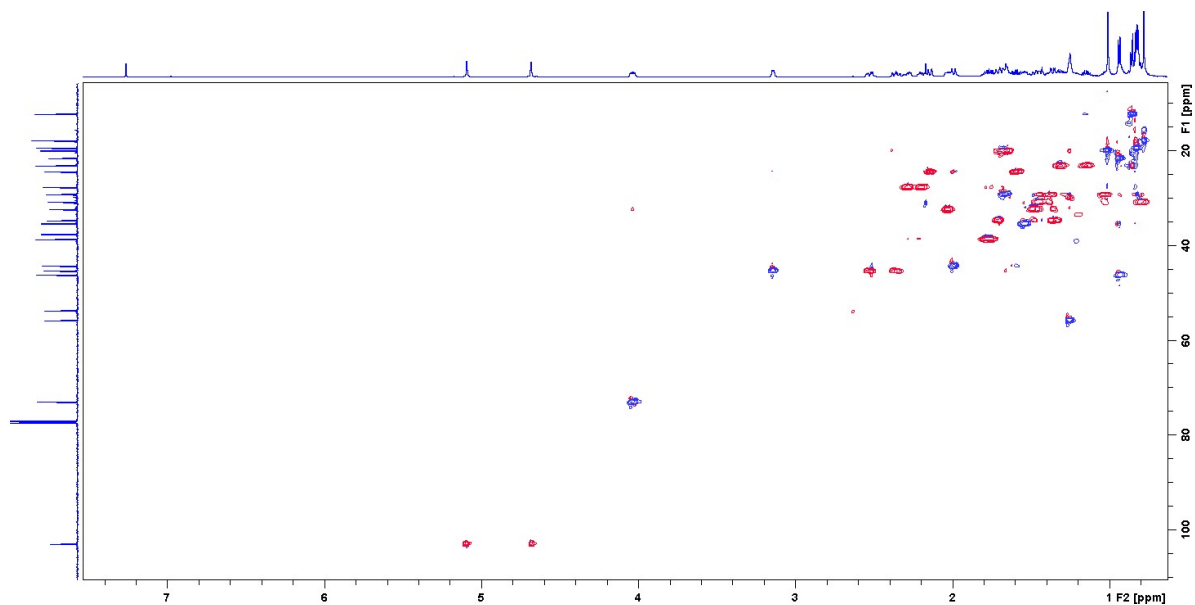

**Figure SII-51.** HSQC spectrum of compound **8** (CDCl<sub>3</sub>, 600 MHz).

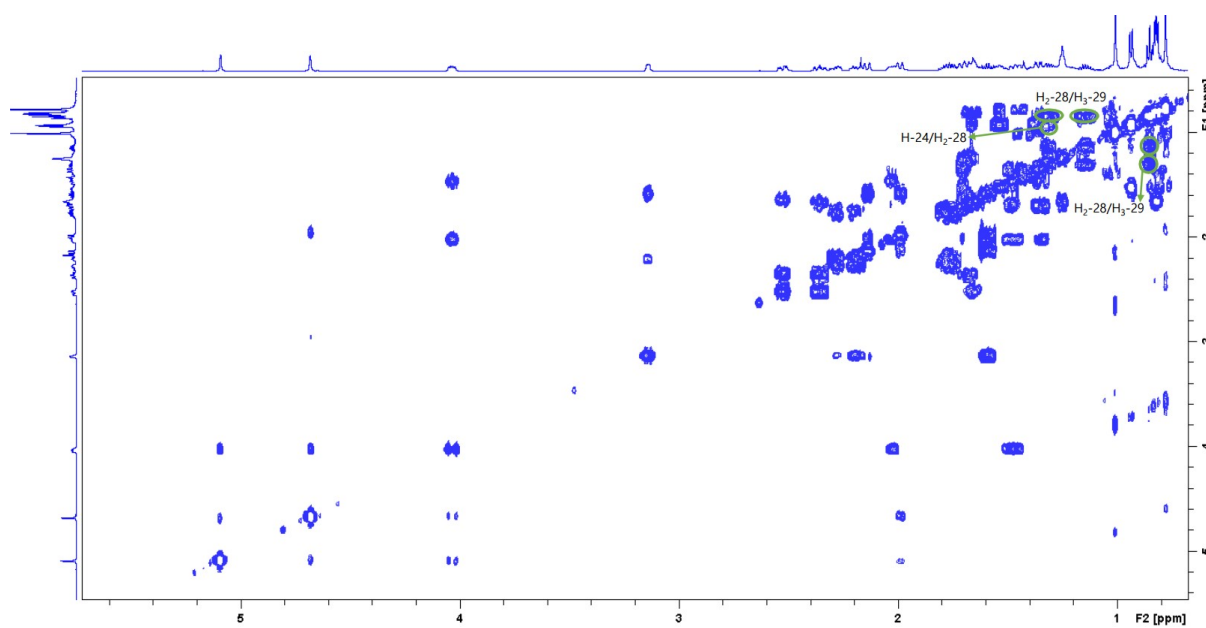

**Figure SII-52.** <sup>1</sup>H-<sup>1</sup>H COSY spectrum of compound **8** (CDCl<sub>3</sub>, 600 MHz).



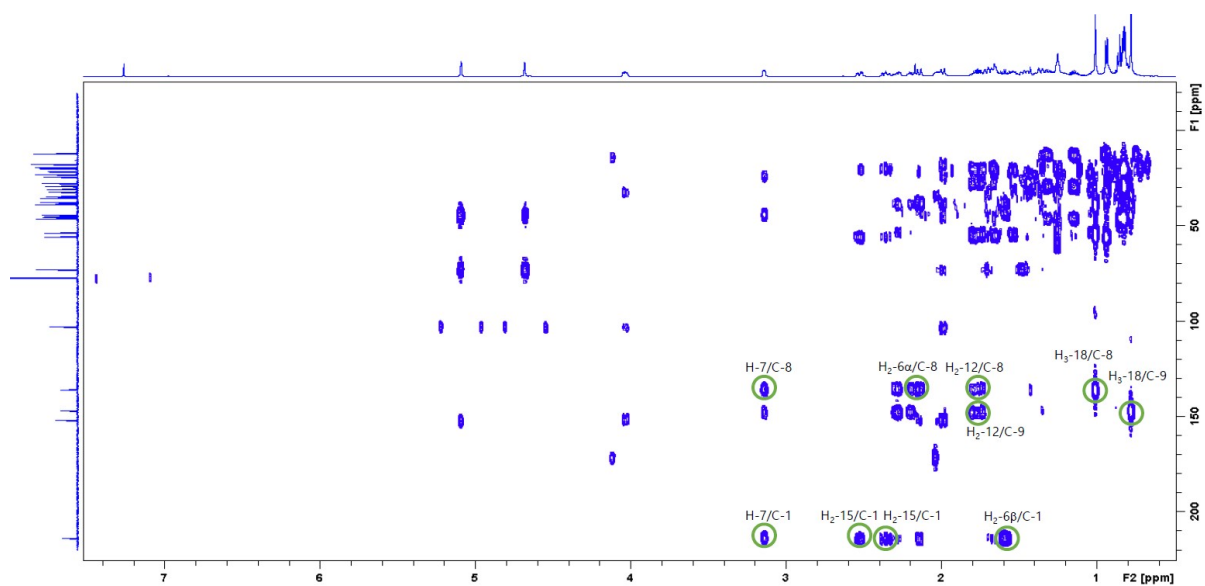

**Figure SII-53.** HMBC spectrum of compound **8** (CDCl<sub>3</sub>, 600 MHz).

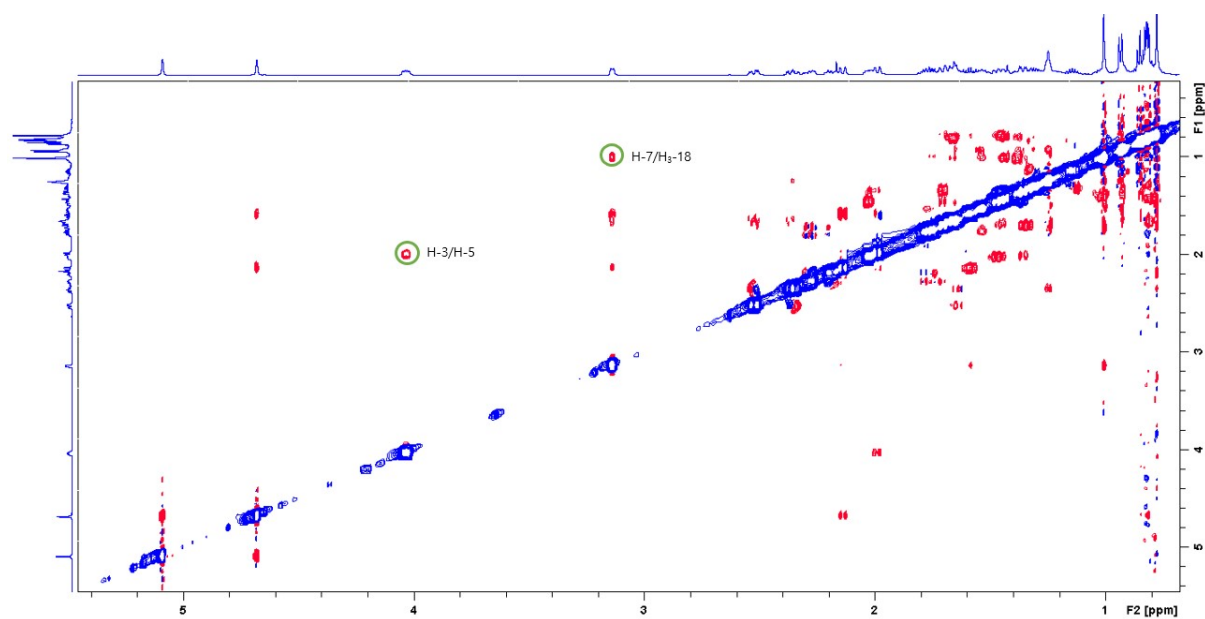

**Figure SII-54.** NOESY spectrum of compound **8** (CDCl<sub>3</sub>, 600 MHz).

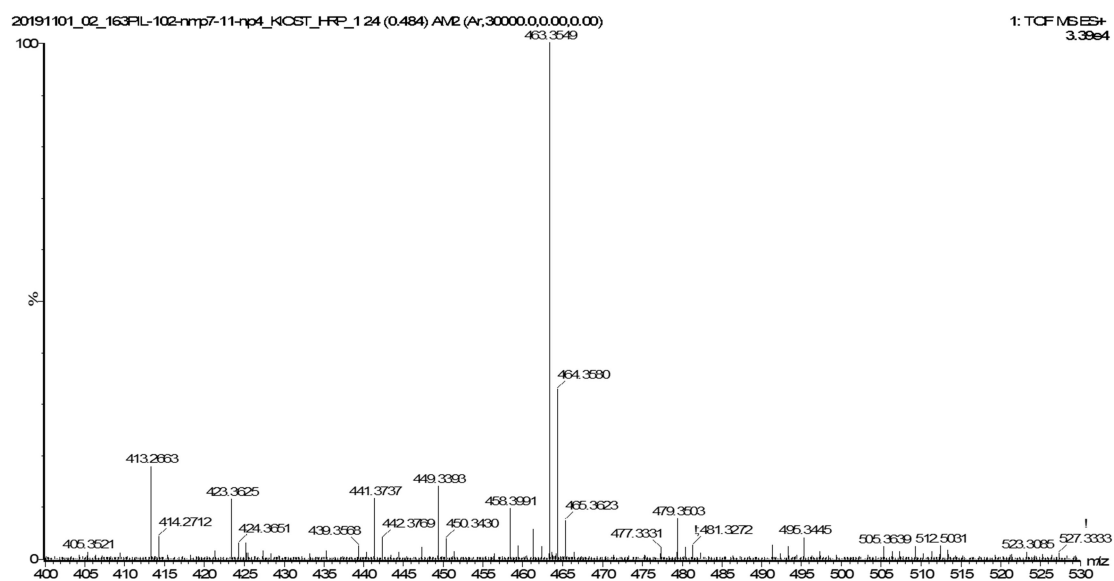

**Figure SII-55.** HRMS spectrum of compound **8**.

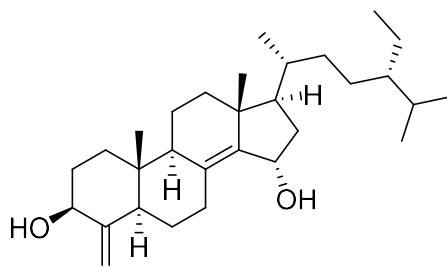

**9**

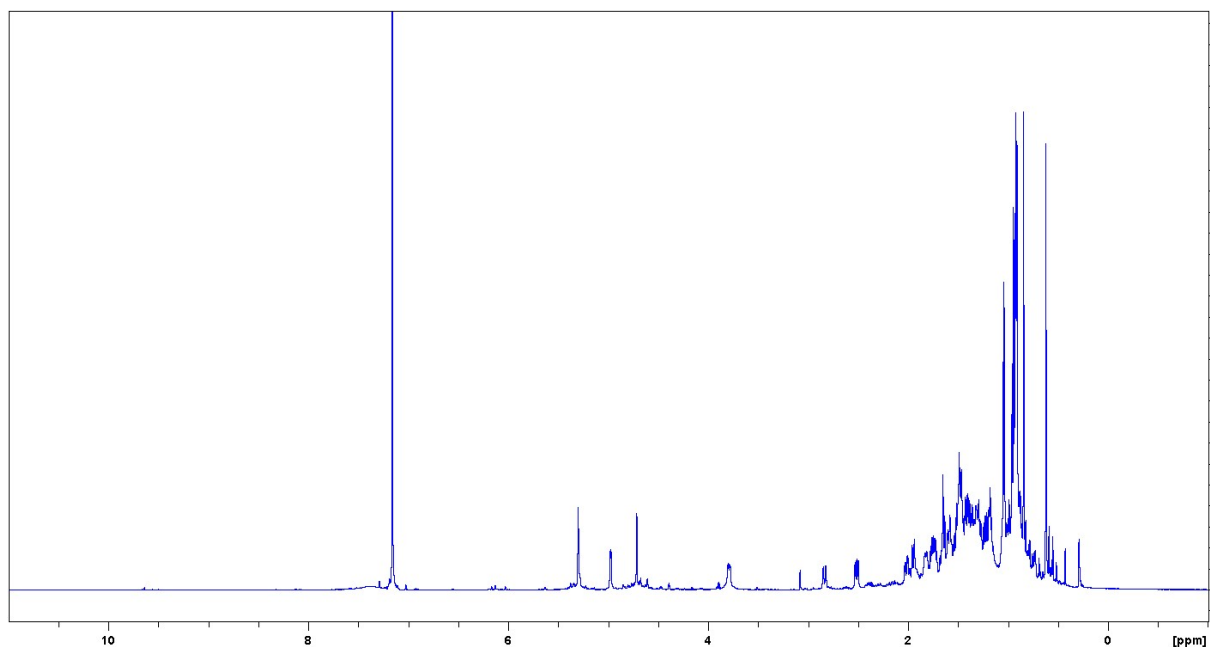

**Figure SII-56.**  $^1\text{H}$  NMR spectrum of compound **9** ( $\text{C}_6\text{D}_6$ , 600 MHz).

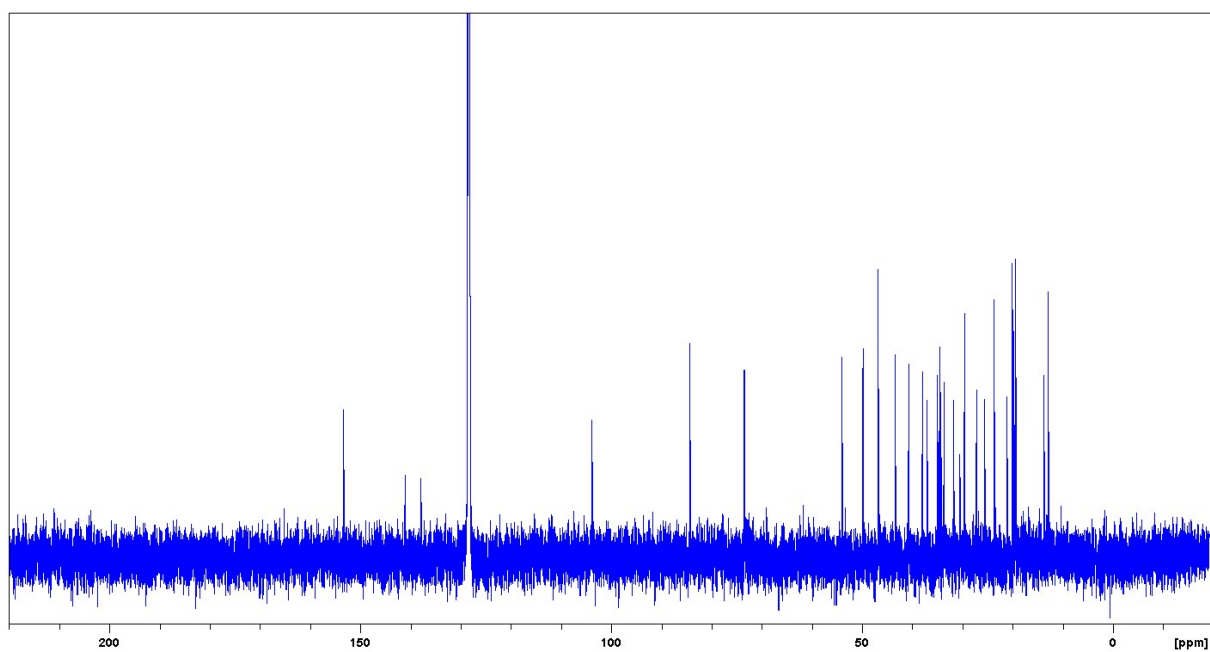

**Figure SII-57.**  $^{13}\text{C}$  NMR spectrum of compound **9** ( $\text{C}_6\text{D}_6$ , 150 MHz).

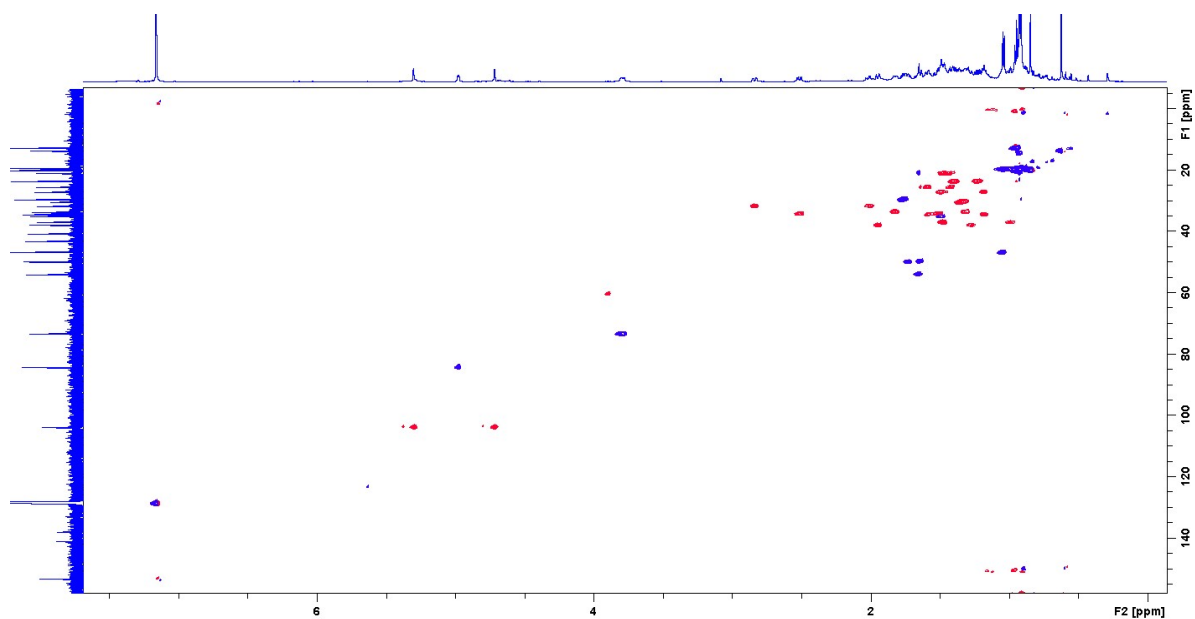

**Figure SII-58.** HSQC spectrum of compound **9** ( $\text{C}_6\text{D}_6$ , 600 MHz).

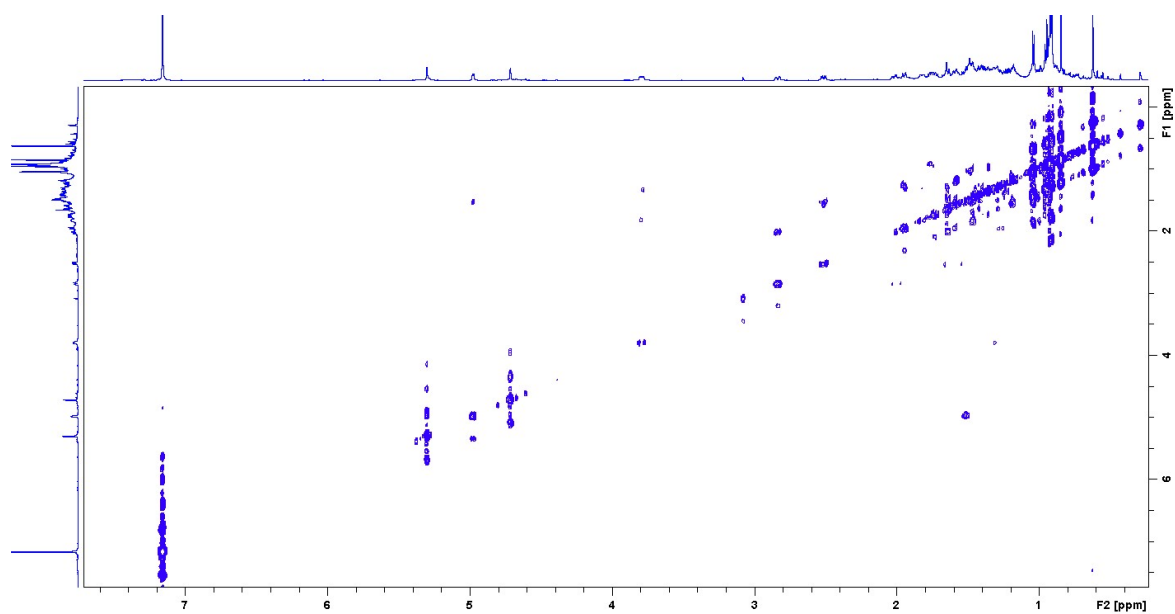

**Figure SII-59.**  $^1\text{H}$ - $^1\text{H}$  COSY spectrum of compound **9** ( $\text{C}_6\text{D}_6$ , 600 MHz).

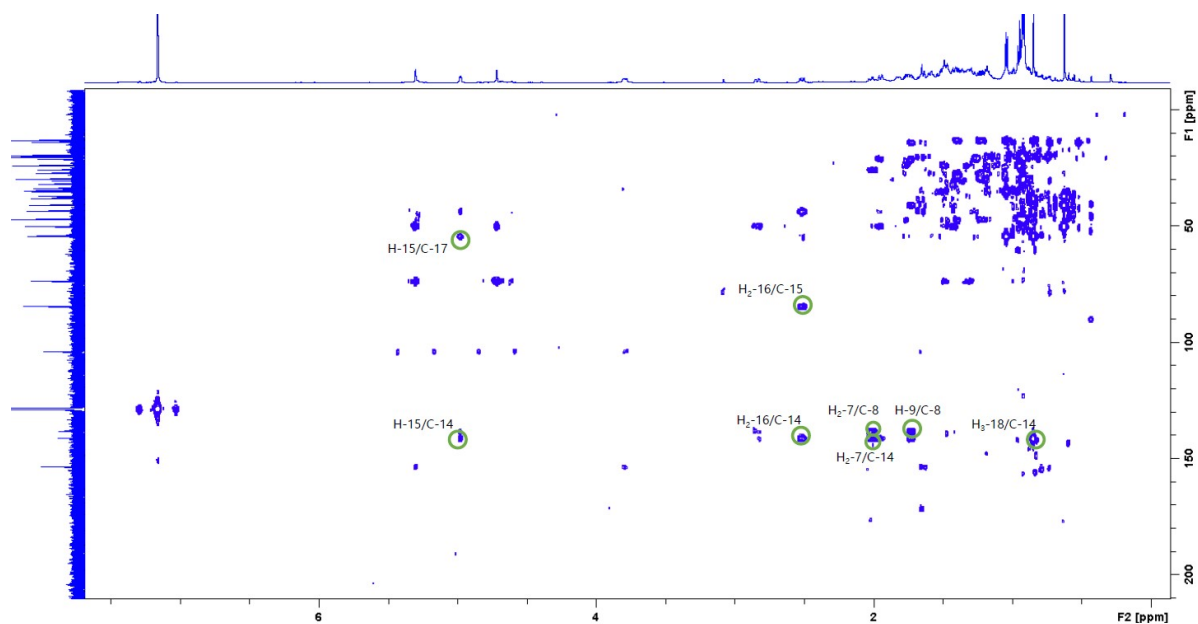

**Figure SII-60.** HMBC spectrum of compound **9** ( $\text{C}_6\text{D}_6$ , 600 MHz).

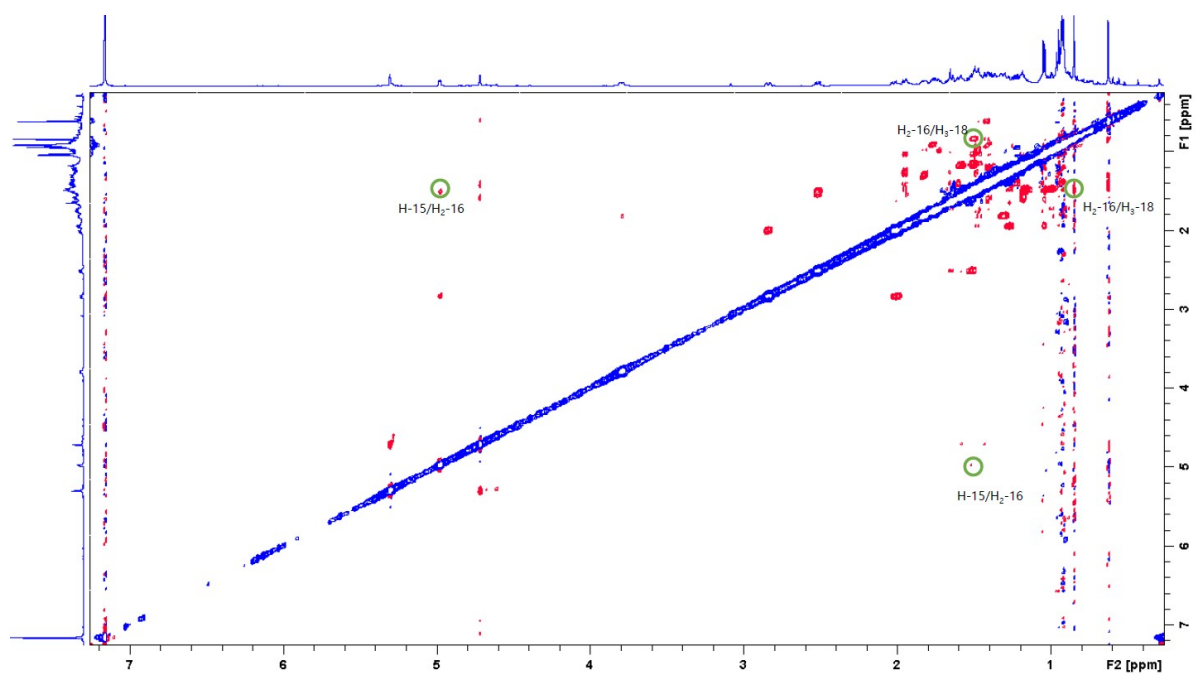

**Figure SII-61.** NOESY spectrum of compound **9** ( $\text{C}_6\text{D}_6$ , 600 MHz).

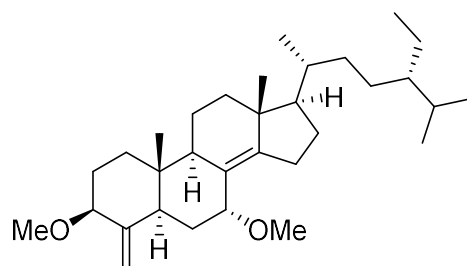

**10**

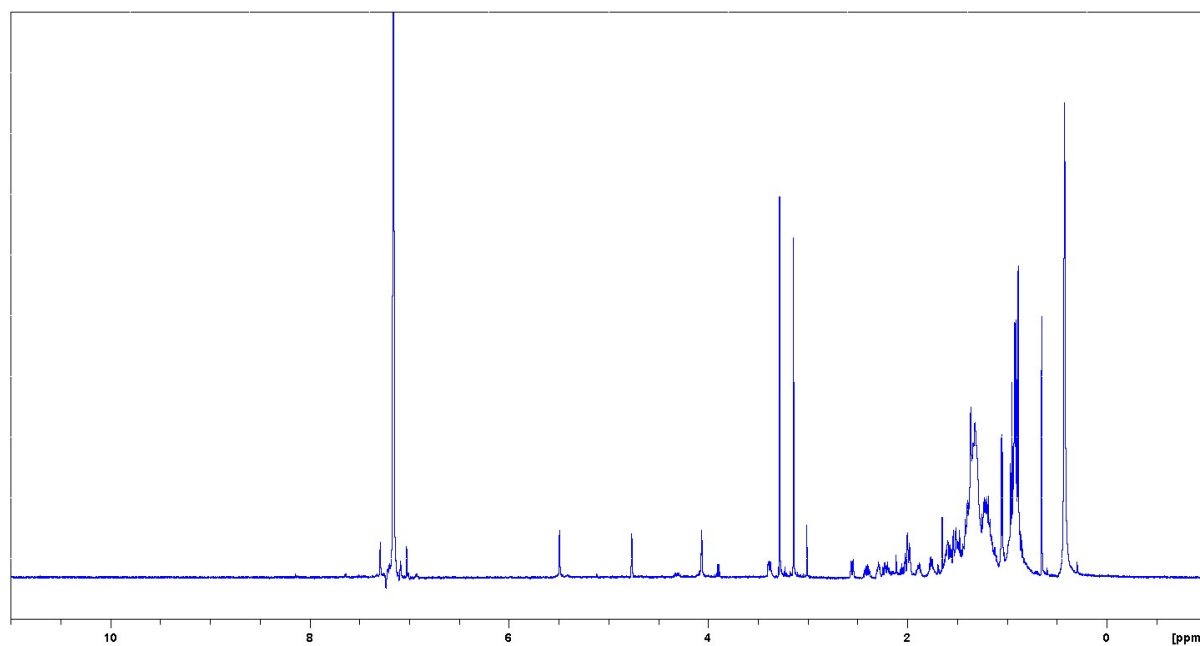

**Figure SII-62.**  $^1\text{H}$  NMR spectrum of 3-Ome-swinhosterol C **10** ( $\text{C}_6\text{D}_6$ , 600 MHz).

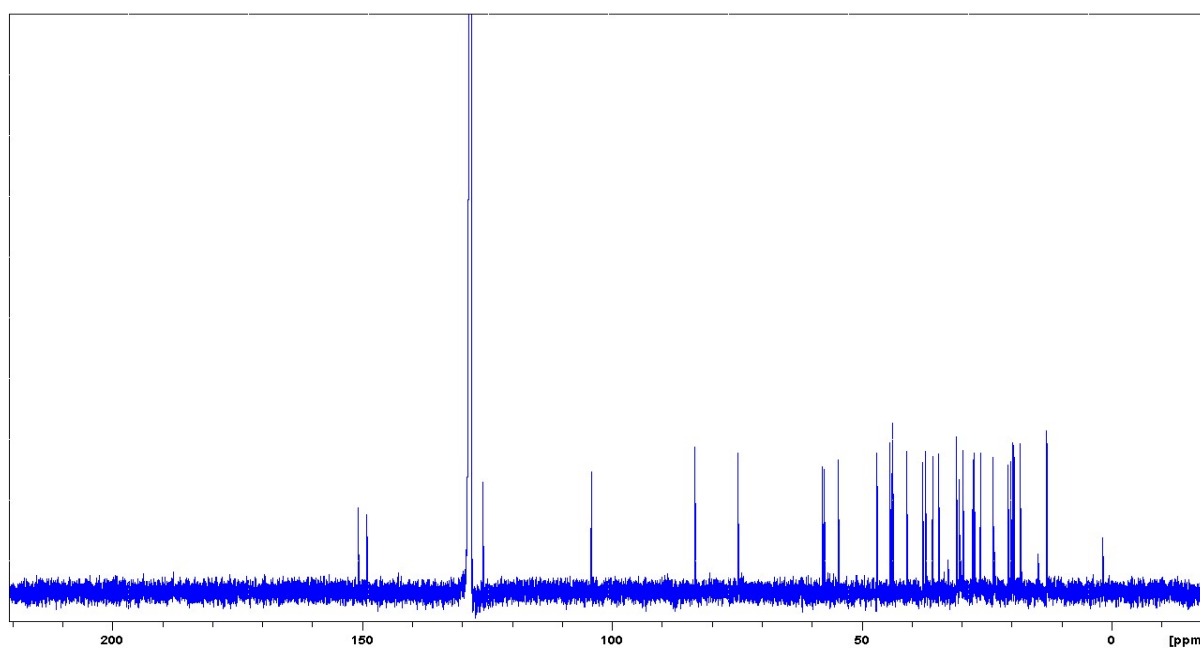

**Figure SII-63.**  $^{13}\text{C}$  NMR spectrum of 3-Ome-swinhosterol C **10** ( $\text{C}_6\text{D}_6$ , 150 MHz).

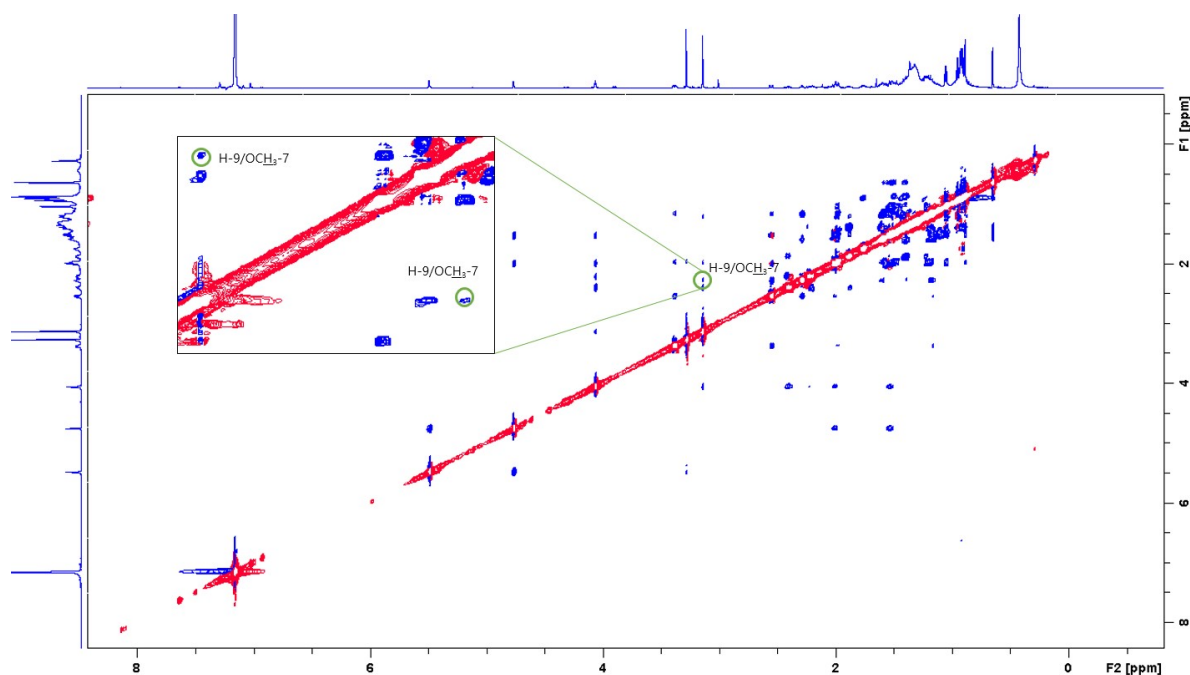

**Figure SII-64.** NOESY spectrum of 3-OMe-swinhosterol C **10** ( $C_6D_6$ , 600 MHz).

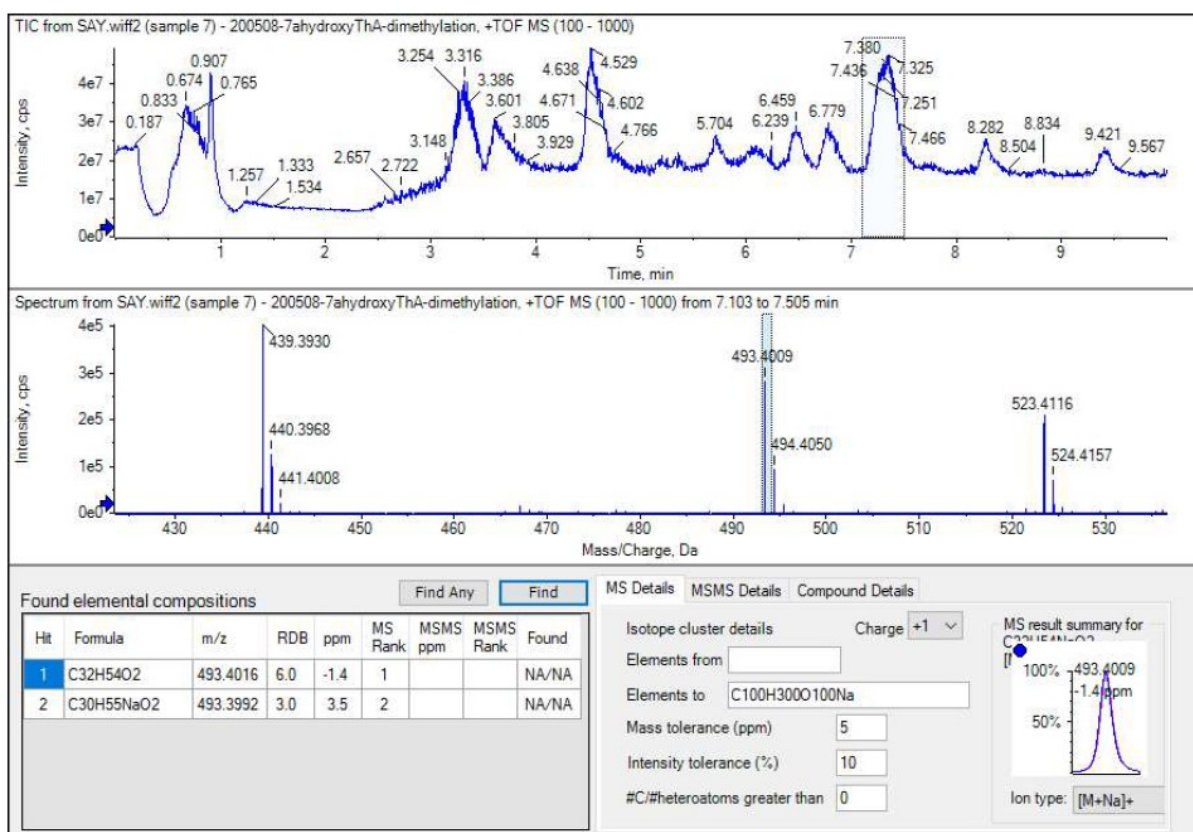

**Figure SII-65.** HRMS spectrum of compound **10**.
