# Supplementary material for: Oxygenated Theonellastrols: Interpretation of Unusual Chemical Behaviors Using Quantum Mechanical Calculations and Stereochemical Reassignment of 7α-Hydroxytheonellasterol
Source: MDPI journal article supplement (doi:10.3390/md18120607), 2020-11-30
Supplement: s1 [file s1]

## Supporting Information I

### *Experimental section*

# Interpretation of Unusual Chemical Behaviors of Oxygenated theonellastrols using Quantum Mechanical Calculations and Stereochemical reassignment of 7 $\alpha$ -hydroxytheonellasterol

*A-Young Shin,<sup>1,2</sup> Hyi-Seung Lee,<sup>1,2</sup> Yeon-Ju Lee,<sup>1,2</sup> Jong Seok Lee,<sup>1,2</sup> Arang Son,<sup>3</sup> Changhoon Cho,<sup>3</sup>*

*and Jihoon Lee<sup>\*1,2</sup>*

<sup>1</sup>Korea Institute of Ocean Science and Technology (KIOST), Busan 49111, Republic of Korea

<sup>2</sup>Department of Marine Biotechnology, University of Science and Technology (UST), Daejeon 34113, Republic of Korea

<sup>3</sup>Department of Radiation Oncology, Samsung Medical Center, Seoul 06351, Republic of Korea

# Table of contents

|                                                                                                                                                                                                                                                                                                 |    |
|-------------------------------------------------------------------------------------------------------------------------------------------------------------------------------------------------------------------------------------------------------------------------------------------------|----|
| I. Experimental procedure .....                                                                                                                                                                                                                                                                 | 4  |
| 1. General information .....                                                                                                                                                                                                                                                                    | 4  |
| 2. Synthesis of compound <b>10</b> .....                                                                                                                                                                                                                                                        | 4  |
| <b>Figure S1.</b> Structures of compounds <b>1-9</b> . ....                                                                                                                                                                                                                                     | 5  |
| <b>Figure S2.</b> Structures of known compounds ( <b>11-16</b> ) isolated from <i>T. swinhoei</i> .....                                                                                                                                                                                         | 5  |
| <b>Table S1.</b> <sup>13</sup> C NMR (150 MHz) data for <b>1-9</b> . ....                                                                                                                                                                                                                       | 6  |
| <b>Table S2.</b> <sup>1</sup> H NMR (600 MHz) data for <b>1-9</b> . ....                                                                                                                                                                                                                        | 7  |
| <b>Figure S3.</b> Key COSY, HMBC, and NOESY correlations of compounds <b>1-10</b> . ....                                                                                                                                                                                                        | 9  |
| II. Computational methods .....                                                                                                                                                                                                                                                                 | 10 |
| 1. Geometry optimization.....                                                                                                                                                                                                                                                                   | 10 |
| 2. Transition state for transformation of compound <b>4</b> to <b>9</b> .....                                                                                                                                                                                                                   | 11 |
| <b>Figure S4.</b> (a) Free energy diagram for 1,3-hydroxyl migration in 8 $\alpha$ -hydroxy-theonellasterol <b>4</b> to generate 15 $\alpha$ -hydroxy-theonellasterol <b>9</b> . (b) Bond lengths for C-8–C-14 and C-14–C-15 and atomic distance between C-15 and O-8 in the TS structure. .... | 11 |
| <b>Table S3.</b> Parameters of optimized structures for compounds <b>4</b> , <b>9</b> , and <b>TS</b> in the gas phase. ....                                                                                                                                                                    | 11 |
| 3. <sup>13</sup> C chemical shift calculations .....                                                                                                                                                                                                                                            | 12 |
| <b>Table S4.</b> The optimized structures of isomers <b>I-IV</b> used for <sup>13</sup> C chemical shift calculations. ....                                                                                                                                                                     | 12 |
| <b>Table S5.</b> Parameters of optimized isomers <b>I-IV</b> in the gas phase. ....                                                                                                                                                                                                             | 12 |
| <b>Table S6.</b> Comparison between experimental and calculated <sup>13</sup> C chemical shifts in C <sub>6</sub> D <sub>6</sub> for isomers <b>I-IV</b> . ....                                                                                                                                 | 13 |
| <b>Figure S5.</b> Linear regression analyses of the experimental and calculated <sup>13</sup> C NMR data for isomers <b>I-IV</b> . ....                                                                                                                                                         | 14 |
| <b>Figure S6.</b> Comparison of $ \delta_{\text{exptl}} - \delta_{\text{calcd}} $ values (parts per million) in C <sub>6</sub> D <sub>6</sub> for isomers <b>I-IV</b> . ....                                                                                                                    | 14 |
| <b>Figure S7.</b> DP4+ probability analyses for isomers <b>I-IV</b> . ....                                                                                                                                                                                                                      | 15 |
| <b>Table S7.</b> Optimized Z-matrixes of isomer <b>5-I</b> in the gas phase (Å ). ....                                                                                                                                                                                                          | 16 |
| <b>Table S8.</b> Optimized Z-matrixes isomer <b>5-II</b> in the gas phase (Å ). ....                                                                                                                                                                                                            | 17 |
| <b>Table S9.</b> Optimized Z-matrixes of <b>5-III</b> in the gas phase (Å ). ....                                                                                                                                                                                                               | 18 |
| <b>Table S10.</b> Optimized Z-matrixes of <b>5-IV</b> in the gas phase (Å ). ....                                                                                                                                                                                                               | 19 |
| III. Determination of the C-24 configuration .....                                                                                                                                                                                                                                              | 20 |
| 1. The list of compounds selected for a database .....                                                                                                                                                                                                                                          | 20 |
| 2. Calculation of $ \delta_{\text{H-26}} - \delta_{\text{H-27}} $ values from the selected compounds .....                                                                                                                                                                                      | 21 |
| <b>Table S11.</b> $ \delta_{\text{H-26}} - \delta_{\text{H-27}} $ values for the (21 <i>R</i> , 24 <i>S</i> ) and (21 <i>R</i> , 24 <i>R</i> )-sets. ....                                                                                                                                       | 21 |
| <b>Table S12.</b> $ \delta_{\text{H-26}} - \delta_{\text{H-27}} $ values for compounds <b>1-9</b> . ....                                                                                                                                                                                        | 21 |
| <b>Figure S8.</b> Comparison of $ \delta_{\text{H-26}} - \delta_{\text{H-27}} $ values for (21 <i>R</i> ,24 <i>S</i> )-set, (21 <i>R</i> ,24 <i>R</i> )-set, and compounds <b>1-9</b> . ....                                                                                                    | 22 |
| IV. X-ray crystallography data.....                                                                                                                                                                                                                                                             | 23 |
| <b>Table S12.</b> Crystal data and structure refinement for 7 $\alpha$ -theonellasterol. ....                                                                                                                                                                                                   | 23 |
| <b>Table S13.</b> Atomic coordinates ( $\times 10^4$ ) and equivalent isotropic displacement parameters ( $\text{\AA}^2 \times 10^3$ ) for 7 $\alpha$ -theonellasterol. ....                                                                                                                    | 24 |
| <b>Table S14.</b> Bond lengths [ $\text{\AA}$ ] and angles [ $^\circ$ ] for 7 $\alpha$ -theonellasterol. ....                                                                                                                                                                                   | 25 |
| <b>Table S15.</b> Anisotropic displacement parameters ( $\text{\AA}^2 \times 10^3$ ) for 7 $\alpha$ -theonellasterol. <sup>a</sup> .....                                                                                                                                                        | 28 |

|                                                                                                                                                                     |    |
|---------------------------------------------------------------------------------------------------------------------------------------------------------------------|----|
| <b>Table S16.</b> Hydrogen coordinates ( $\times 10^4$ ) and isotropic displacement parameters ( $\text{\AA}^2 \times 10^3$ ) for 7 $\alpha$ -theonellasterol. .... | 30 |
| <b>Table S17.</b> Hydrogen bonds for 7 $\alpha$ -theonellasterol [ $\text{\AA}$ and $^\circ$ ]. <sup>a</sup> .....                                                  | 31 |
| <b>Table S18.</b> Torsion angles [ $^\circ$ ] for 7 $\alpha$ -theonellasterol. ....                                                                                 | 32 |

# I. Experimental procedure

## 1. General information

Specific optical rotations were obtained on a Rudolph Research Analytical (Autopol III) polarimeter. IR spectra were recorded on a JASCO FT/IR-4100 spectrophotometer. The 1D ( $^1\text{H}$  and  $^{13}\text{C}$ ) and 2D (COSY, HSQC, HMBC, and NOESY) NMR spectra were taken in  $\text{C}_6\text{D}_6$  or  $\text{CDCl}_3$  using a Bruker 600 MHz spectrometer at 298.1 K.  $^1\text{H}$  NMR spectra were collected after 64 scans, and  $^{13}\text{C}$  NMR spectra were collected at a range of 10000~15000 scans depending on the sample concentrations. The mixing time for NOESY experiments was set as 0.3 seconds. Chemical shifts are reported in parts per million relative to  $\text{C}_6\text{D}_6$  ( $\delta_{\text{H}}$  7.16,  $\delta_{\text{C}}$  128.4) and  $\text{CDCl}_3$  ( $\delta_{\text{H}}$  7.26,  $\delta_{\text{C}}$  77.1). High resolution mass-spectra were obtained on a Waters Q-TOF spectrometer equipped with an ESI source and a JEOL JMS-700 spectrometer with an FAB Source at Korea Basic Science Institute (KBSI). MPLC was performed using the TELEDYNE ISCO CombiFlash Companion with the TELEDYNE ISCO RediSep Normal-phase Silica Flash Column. HPLC was performed on a PrimeLine Binary pump utilizing Silica columns (YMC-Pack Silica,  $250 \times 10$  mm I.D., or  $250 \times 4.6$  mm I.D., 5  $\mu\text{m}$ ), the Shodex RI-101, or the UV-M201.

## 2. Synthesis of compound 10

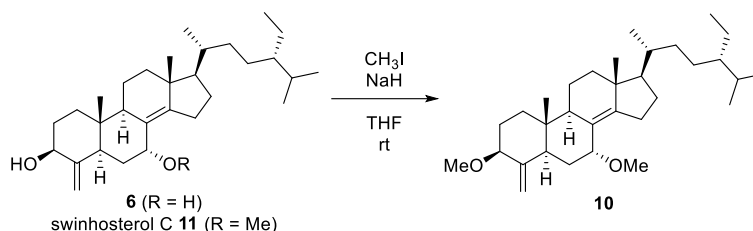

**Synthesis of 3-OMe-swinhosterol C 10:** To a solution of **6** (1.0 equiv) in anhydrous THF (0.02 M) was added sodium hydride (5.0 equiv, 60% dispersion in mineral oil) under  $\text{N}_2$  atmosphere, and the resulting suspension was stirred for 10 min at 0  $^\circ\text{C}$ . Methyl iodide (5.0 equiv) was added and the reaction mixture was stirred for 5 h at room temperature. The reaction was monitored until the starting material disappeared on TLC. After completion of reaction, the reaction mixture was quenched by slow addition of water at 0  $^\circ\text{C}$  and diluted with EtOAc. The organic layer was separated, and the aqueous layer was extracted with EtOAc (x 2). The combined organic layers were dried over anhydrous  $\text{MgSO}_4$ , filtered, and concentrated under reduced pressure. The crude material was purified by column chromatography on  $\text{SiO}_2$  (hexane/EtOAc 20:1) to afford **10** as a white powder (70% yield).  $[\alpha]_{\text{D}}^{25} = +23.33$  (c, 0.1, MeOH);

**IR**  $\nu_{\text{max}}$  (ATR) 2957, 2953, 2872, 2353, 1593, 1102  $\text{cm}^{-1}$ ;

**$^1\text{H}$  NMR** (600 MHz,  $\text{C}_6\text{D}_6$ ) :  $\delta$  5.49 (s, 1H), 4.77 (s, 1H), 4.06 (t,  $J = 3.0$  Hz, 1H), 3.38 (dd,  $J = 11.3, 5.0$  Hz, 1H), 3.28 (s, 3H), 3.14 (s, 3H), 2.56 (br d,  $J = 12.0$  Hz, 1H), 2.45 - 2.38 (m, 1H), 2.29 (td,  $J = 7.9, 3.4$  Hz, 1H), 2.25 - 2.17 (m, 1H), 2.04 - 1.96 (m, 3H), 1.92 - 1.86 (m, 1H), 1.78 - 1.74 (m, 1H), 1.63 - 1.35 (m, 7H), 1.26 - 1.09 (m, 8H), 1.05 (d,  $J = 6.6$  Hz, 3H), 1.05 (m, 1H), 0.95 (t,  $J = 7.4$  Hz, 3H), 0.92 (d,  $J = 6.9$  Hz, 3H), 0.91 (d,  $J = 6.9$  Hz, 3H), 0.89 (s, 3H), 0.65 (s, 3H);

**$^{13}\text{C}$  NMR** (150 MHz,  $\text{C}_6\text{D}_6$ ) :  $\delta$  150.7, 149.0, 125.8, 104.1, 83.4, 74.8, 57.9, 57.5, 54.7, 46.9, 44.3, 44.1, 43.8, 40.9, 37.9, 37.3, 35.8, 34.6, 31.2, 31.0, 29.8, 27.8, 27.5, 26.3, 23.8, 20.7, 20.2, 19.9, 19.6, 18.3, 13.1, 12.9;

**HRESIMS**  $m/z$  calcd for  $\text{C}_{32}\text{H}_{54}\text{O}_2\text{Na}$   $[\text{M}+\text{Na}]^+$  493.4016, found: 493.4009.

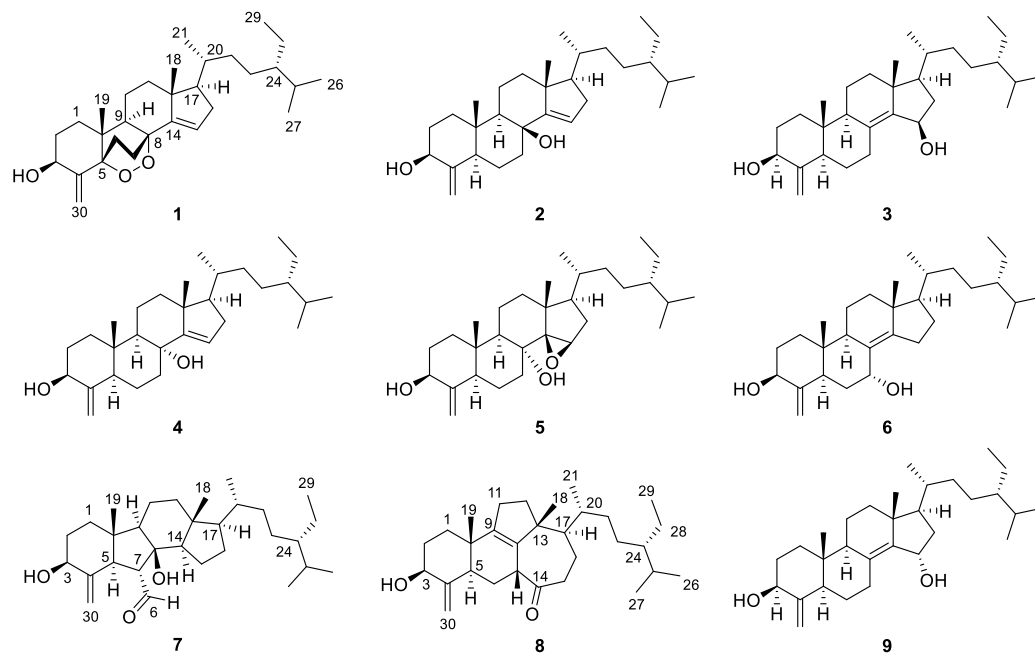

**Figure S1.** Structures of compounds **1-9**.

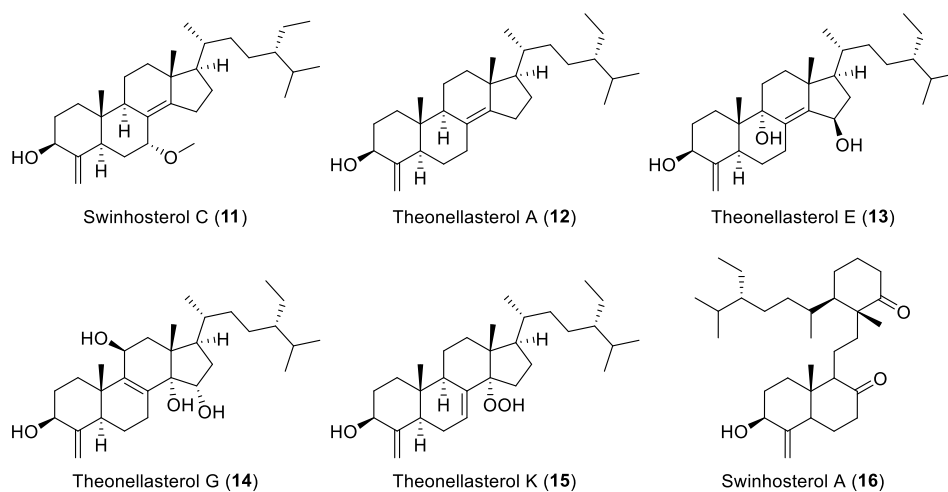

**Figure S2.** Structures of known compounds (**11-16**) isolated from *T. swinhoei*.

**Table S1.**  $^{13}\text{C}$  NMR (150 MHz) data for **1-9**.

| Position | $\delta_{\text{C}}$ |                |                |                |                |                |                |                |                |
|----------|---------------------|----------------|----------------|----------------|----------------|----------------|----------------|----------------|----------------|
|          | 1 <sup>a</sup>      | 2 <sup>a</sup> | 3 <sup>a</sup> | 4 <sup>a</sup> | 5 <sup>a</sup> | 6 <sup>b</sup> | 7 <sup>a</sup> | 8 <sup>b</sup> | 9 <sup>a</sup> |
| 1        | 37.8                | 38.4           | 37.2           | 40.8           | 41.5           | 36.7           | 37.7           | 34.7           | 37.1           |
| 2        | 32.1                | 33.4           | 33.8           | 33.2           | 33.3           | 33.2           | 33.3           | 32.4           | 33.7           |
| 3        | 69.8                | 73.5           | 73.6           | 73.6           | 73.8           | 73.4           | 73.2           | 73.0           | 73.5           |
| 4        | 150.6               | 153.3          | 153.4          | 153.8          | 154.2          | 152.8          | 148.9          | 151.8          | 153.4          |
| 5        | 91.9                | 51.0           | 49.89          | 41.1           | 41.2           | 42.5           | 52.6           | 44.3           | 49.8           |
| 6        | 30.6                | 21.0           | 25.5           | 19.7           | 20.3           | 31.5           | 204.2          | 24.5           | 25.6           |
| 7        | 31.5                | 31.2           | 31.2           | 31.9           | 28.3           | 66.7           | 60.6           | 45.3           | 31.8           |
| 8        | 86.8                | 83.5           | 134.1          | 86.6           | 71.3           | 127.7          | 20.3           | 135.8          | 138.0          |
| 9        | 58.3                | 56.9           | 49.93          | 46.5           | 55.3           | 43.9           | 87.2           | 146.9          | 50.0           |
| 10       | 44.2                | 39.8           | 40.7           | 37.7           | 38.2           | 39.9           | 63.6           | 37.6           | 40.8           |
| 11       | 21.6                | 19.0           | 21.2           | 22.7           | 23.3           | 20.0           | 44.8           | 27.7           | 21.2           |
| 12       | 44.1                | 43.6           | 38.5           | 39.0           | 34.7           | 37.0           | 20.3           | 38.6           | 38.0           |
| 13       | 49.4                | 47.7           | 43.8           | 48.0           | 42.5           | 43.1           | 37.1           | 53.7           | 43.5           |
| 14       | 152.6               | 151.2          | 148.4          | 155.8          | 75.9           | 148.5          | 45.4           | 213.7          | 141.1          |
| 15       | 116.8               | 126.2          | 70.3           | 123.2          | 58.8           | 25.3           | 58.6           | 45.4           | 84.4           |
| 16       | 36.5                | 35.8           | 39.6           | 35.2           | 32.3           | 27.1           | 22.9           | 20.1           | 34.4           |
| 17       | 60.6                | 60.2           | 54.2           | 60.0           | 49.8           | 56.4           | 30.4           | 55.8           | 54.1           |
| 18       | 19.0                | 18.1           | 19.93          | 17.4           | 15.0           | 18.10          | 57.3           | 19.9           | 20.1           |
| 19       | 20.1                | 15.1           | 13.8           | 16.9           | 17.2           | 12.5           | 22.5           | 17.8           | 13.9           |
| 20       | 34.8                | 34.7           | 35.0           | 34.9           | 34.4           | 35.0           | 15.3           | 35.3           | 35.1           |
| 21       | 19.6                | 19.6           | 19.6           | 19.5           | 19.2           | 19.2           | 36.3           | 21.6           | 19.9           |
| 22       | 34.6                | 34.5           | 34.7           | 34.5           | 34.1           | 33.8           | 19.6           | 30.8           | 34.6           |
| 23       | 26.9                | 27.0           | 27.2           | 27.3           | 27.1           | 26.3           | 35.2           | 29.3           | 27.3           |
| 24       | 46.9                | 46.9           | 47.0           | 46.9           | 46.8           | 46.2           | 46.9           | 46.2           | 46.9           |
| 25       | 29.7                | 29.7           | 29.7           | 29.8           | 29.6           | 29.1           | 29.8           | 29.2           | 29.6           |
| 26       | 19.6                | 19.5           | 19.92          | 19.6           | 19.4           | 19.3           | 19.5           | 19.36          | 19.5           |
| 27       | 20.0                | 20.1           | 20.2           | 20.2           | 20.1           | 19.7           | 20.3           | 19.4           | 20.2           |
| 28       | 23.8                | 23.8           | 23.8           | 23.8           | 23.7           | 23.2           | 23.8           | 23.2           | 23.8           |
| 29       | 12.9                | 12.9           | 13.0           | 13.0           | 12.9           | 12.5           | 13.0           | 12.3           | 13.0           |
| 30       | 111.2               | 103.4          | 103.9          | 103.7          | 103.3          | 102.9          | 104.7          | 102.9          | 103.9          |

<sup>a</sup> Measured in  $\text{C}_6\text{D}_6$ ; <sup>b</sup> Measured in  $\text{CDCl}_3$ ;  $^{13}\text{C}$  assignments aided by HSQC, HMBC and DEPT135 experiments.

**Table S2.**  $^1\text{H}$  NMR (600 MHz) data for **1-9**.

| Position | $\delta_{\text{H}}$ (J, Hz)    |                               |                               |                               |                               |                         |                         |                                |                               |
|----------|--------------------------------|-------------------------------|-------------------------------|-------------------------------|-------------------------------|-------------------------|-------------------------|--------------------------------|-------------------------------|
|          | 1 <sup>a</sup>                 | 2 <sup>a</sup>                | 3 <sup>a</sup>                | 4 <sup>a</sup>                | 5 <sup>a</sup>                | 6 <sup>b</sup>          | 7 <sup>a</sup>          | 8 <sup>b</sup>                 | 9 <sup>a</sup>                |
| 1        | 1.23, m                        | 0.79, m                       | 1.01, m                       | 1.40, m                       | 1.26, m                       | 1.36, m                 | 1.08, m                 | 1.34, m                        | 0.99, m                       |
|          | 1.33, m                        | 1.54, m                       | 1.51, m                       | 1.65, m                       | 1.56, m                       | 1.74, m                 | 1.40, m                 | 1.69, m                        | 1.48, m                       |
| 2        | 1.33, m                        | 1.37, m                       | 1.31, m                       | 1.40, m                       | 1.41, m                       | 1.39, m                 | 1.33, m                 | 1.45, m                        | 1.32, m                       |
|          | 2.32, m                        | 1.79, m                       | 1.82, m                       | 1.73, m                       | 1.73, m                       | 2.02, m                 | 1.76, m                 | 2.01, m                        | 1.83, m                       |
| 3        | 4.64, m                        | 3.79, dd<br>(11.6, 5.7)       | 3.80, dd<br>(11.6, 5.3)       | 3.76, m                       | 3.84, dd<br>(11.9, 5.1)       | 4.05, dd<br>(10.4, 5.3) | 3.77, dd<br>(11.0, 5.9) | 4.03, dd<br>(11.4, 5.7)        | 3.79, dd<br>(11.5, 5.7)       |
| 5        |                                | 1.48, m                       | 1.62, m                       | 3.03, dd<br>(12.0, 5.1)       | 3.35, m                       | 2.34, brd<br>(13.6)     | 2.38, d<br>(12.7)       | 1.95, brd<br>(12.7)            | 1.64, m                       |
| 6        | 1.33, m                        | 1.44, m                       | 1.38, m                       | 1.54, m                       | 1.73, m                       | 1.59, m                 | 9.75, d<br>(3.3)        | 2.13, td<br>(12.9, 6.4)        | 1.42, m                       |
|          | 1.77, m                        | 1.89, m                       | 1.54, m                       | 1.67, m                       | 1.91, m                       | 1.77, m                 |                         | 1.58, brd<br>(12.9)            | 1.58, m                       |
| 7        | 1.43, m                        | 1.20, m                       | 1.82, m                       | 1.68, m                       | 1.60, m                       | 4.64, t<br>(2.82)       | 2.45, dd<br>(12.7, 3.2) | 3.13, m                        | 2.01, td<br>(14.0, 5.4)       |
|          | 1.86, m                        | 2.67, dt<br>(13.4, 3.0)       | 2.78, ddd<br>(14.2, 4.5, 2.3) | 1.76, m                       | 1.82, m                       |                         |                         |                                | 2.84, ddd<br>(14.8, 4.5, 2.2) |
| 9        | 1.59, m                        | 1.01, m                       | 1.69, m                       | 2.27, dd<br>(12.1, 7.0)       | 1.41, m                       | 2.26, m                 | 1.40, m                 |                                | 1.73, m                       |
| 11       | 1.33, m                        | 1.30, m                       | 1.42, m                       | 1.49, m                       | 1.41, m                       | 1.46, m                 | 1.09, m                 | 2.19, m                        | 1.42-1.46, m                  |
|          | 1.33, m                        | 1.82, m                       | 1.49, m                       | 1.49, m                       | 1.48, m                       | 1.68, m                 | 1.30, m                 | 2.27, m                        | 1.42-1.46, m                  |
| 12       | 1.23, m                        | 1.24, m                       | 1.22, m                       | 1.15, m                       | 1.56, m                       | 1.16, m                 | 1.50, m                 | 1.76, m                        | 1.27, m                       |
|          | 1.93, dt<br>(13.0, 2.8)        | 1.99, m                       | 1.97, m                       | 1.79, m                       | 1.68, m                       | 1.96, dt<br>(12.6, 3.4) | 1.68, m                 | 1.76, m                        | 1.95, m                       |
| 14       |                                |                               |                               |                               |                               |                         | 1.33, m                 |                                |                               |
| 15       | 5.80, dd<br>(3.3, 1.5)         | 5.52, m                       | 4.64, d<br>(4.8)              | 5.61, m                       | 3.33, s                       | 2.02, m                 | 1.78, m                 | 2.35, ddd<br>(16.2, 6.1, 2.4)  | 4.97, d<br>(5.4)              |
|          |                                |                               |                               |                               |                               | 2.02, m                 | 1.78, m                 | 2.52, ddd<br>(15.8, 11.7, 3.4) |                               |
| 16       | 2.01, ddd<br>(15.7, 10.2, 1.4) | 1.96, m                       | 1.60, m                       | 1.89, dd<br>(15.6, 10.6)      | 0.93, m                       | 1.42, m                 | 1.33, m                 | 1.65, m                        | 1.49, m                       |
|          | 2.36, m                        | 2.31, ddd<br>(16.0, 7.2, 3.5) | 1.95, m                       | 2.19, ddd<br>(15.6, 7.3, 3.4) | 1.96, ddd<br>(13.5, 6.7, 1.1) | 1.88, m                 | 1.97, m                 | 1.65, m                        | 2.52, dd<br>(13.9, 6.0)       |
| 17       | 1.68, m                        | 1.60, m                       | 1.60, m                       | 1.51, m                       | 1.41, m                       | 1.20, m                 | 1.69, m                 | 1.24, m                        | 1.65, m                       |
| 18       | 0.92, s                        | 1.11, s                       | 0.82, s                       | 0.83, s                       | 0.71, s                       | 0.84, s                 | 0.81, s                 | 1.00, s                        | 0.84, s                       |
| 19       | 0.68, s                        | 0.97, s                       | 0.61, s                       | 0.68, s                       | 0.72, s                       | 0.56, s                 | 0.39, s                 | 0.77, s                        | 0.62, s                       |
| 20       | 1.59, m                        | 1.60, m                       | 1.48, m                       | 1.57, m                       | 1.24, m                       | 1.46, m                 | 1.41, m                 | 1.53, m                        | 1.49, m                       |
| 21       | 0.98, d<br>(6.4)               | 0.97, d<br>(7.2)              | 1.06, d<br>(6.6)              | 0.95, m                       | 0.84, d<br>(6.5)              | 0.95, d<br>(6.6)        | 1.04, d<br>(6.5)        | 0.93, d<br>(6.9)               | 1.04, d<br>(6.6)              |
| 22       | 1.08, m                        | 1.10, m                       | 1.18, m                       | 1.06, m                       | 0.93, m                       | 1.05, m                 | 1.09, m                 | 1.42, m                        | 1.18, m                       |
|          | 1.45, m                        | 1.40, m                       | 1.54, m                       | 1.44, m                       | 1.31, m                       | 1.40, m                 | 1.52, m                 | 1.42, m                        | 1.58, m                       |
| 23       | 1.16, m                        | 1.20, m                       | 1.18, m                       | 1.17, m                       | 1.01, m                       | 1.05, m                 | 1.20, m                 | 1.02, m                        | 1.18, m                       |

|     |                  |                  |                  |                  |                  |                  |                  |                  |                  |
|-----|------------------|------------------|------------------|------------------|------------------|------------------|------------------|------------------|------------------|
|     | 1.43, m          | 1.45, m          | 1.48, m          | 1.44, m          | 1.34, m          | 1.31, m          | 1.48, m          | 1.38, m          | 1.48, m          |
| 24  | 1.01, m          | 1.06, m          | 1.05, m          | 1.05, m          | 0.97, m          | 0.93, m          | 1.05, m          | 0.91, m          | 1.05, m          |
| 25  | 1.73, m          | 1.77, m          | 1.75, m          | 1.76, m          | 1.70, m          | 1.69, m          | 1.76, m          | 1.65, m          | 1.76, m          |
| 26  | 0.88, d<br>(6.9) | 0.90, d<br>(6.9) | 0.91, d<br>(6.8) | 0.92, d<br>(7.6) | 0.86, d<br>(6.8) | 0.82, d<br>(6.9) | 0.89, d<br>(6.8) | 0.81, d<br>(4.0) | 0.91, d<br>(6.8) |
| 27  | 0.90, d<br>(6.9) | 0.92, d<br>(6.9) | 0.92, d<br>(6.8) | 0.91, d<br>(7.6) | 0.88, d<br>(7.0) | 0.83, d<br>(6.9) | 0.92, d<br>(6.8) | 0.82, d<br>(4.0) | 0.92, d<br>(6.8) |
| 28  | 1.21, m          | 1.23, m          | 1.23, m          | 1.22, m          | 1.15, m          | 1.16, m          | 1.23, m          | 1.13, m          | 1.23, m          |
|     | 1.33, m          | 1.40, m          | 1.39, m          | 1.40, m          | 1.34, m          | 1.31, m          | 1.40, m          | 1.32, m          | 1.40, m          |
| 29  | 0.93, t (7.4)    | 0.95, t (7.5)    | 0.95, t (7.4)    | 0.95, t (7.3)    | 0.91, t (7.5)    | 0.85, t (7.4)    | 0.95, t (7.4)    | 0.84, t (7.4)    | 0.95, t (7.4)    |
| 30  | 5.13, s          | 4.81, s          | 4.68, s          | 4.08, s          | 4.90, s          | 4.61, s          | 4.53, s          | 4.67, s          | 4.71, s          |
|     | 5.59, s          | 5.26, s          | 5.28, s          | 5.37, s          | 5.40, s          | 5.08, s          | 5.16, s          | 5.08, s          | 5.30, s          |
| -OH |                  |                  |                  |                  | 3.47, d<br>(2.2) |                  |                  |                  |                  |

<sup>a</sup> Measured in C<sub>6</sub>D<sub>6</sub>; <sup>b</sup> Measured in CDCl<sub>3</sub>; The assignments were aided by COSY, NOESY, HSQC, and HMBC NMR spectra.



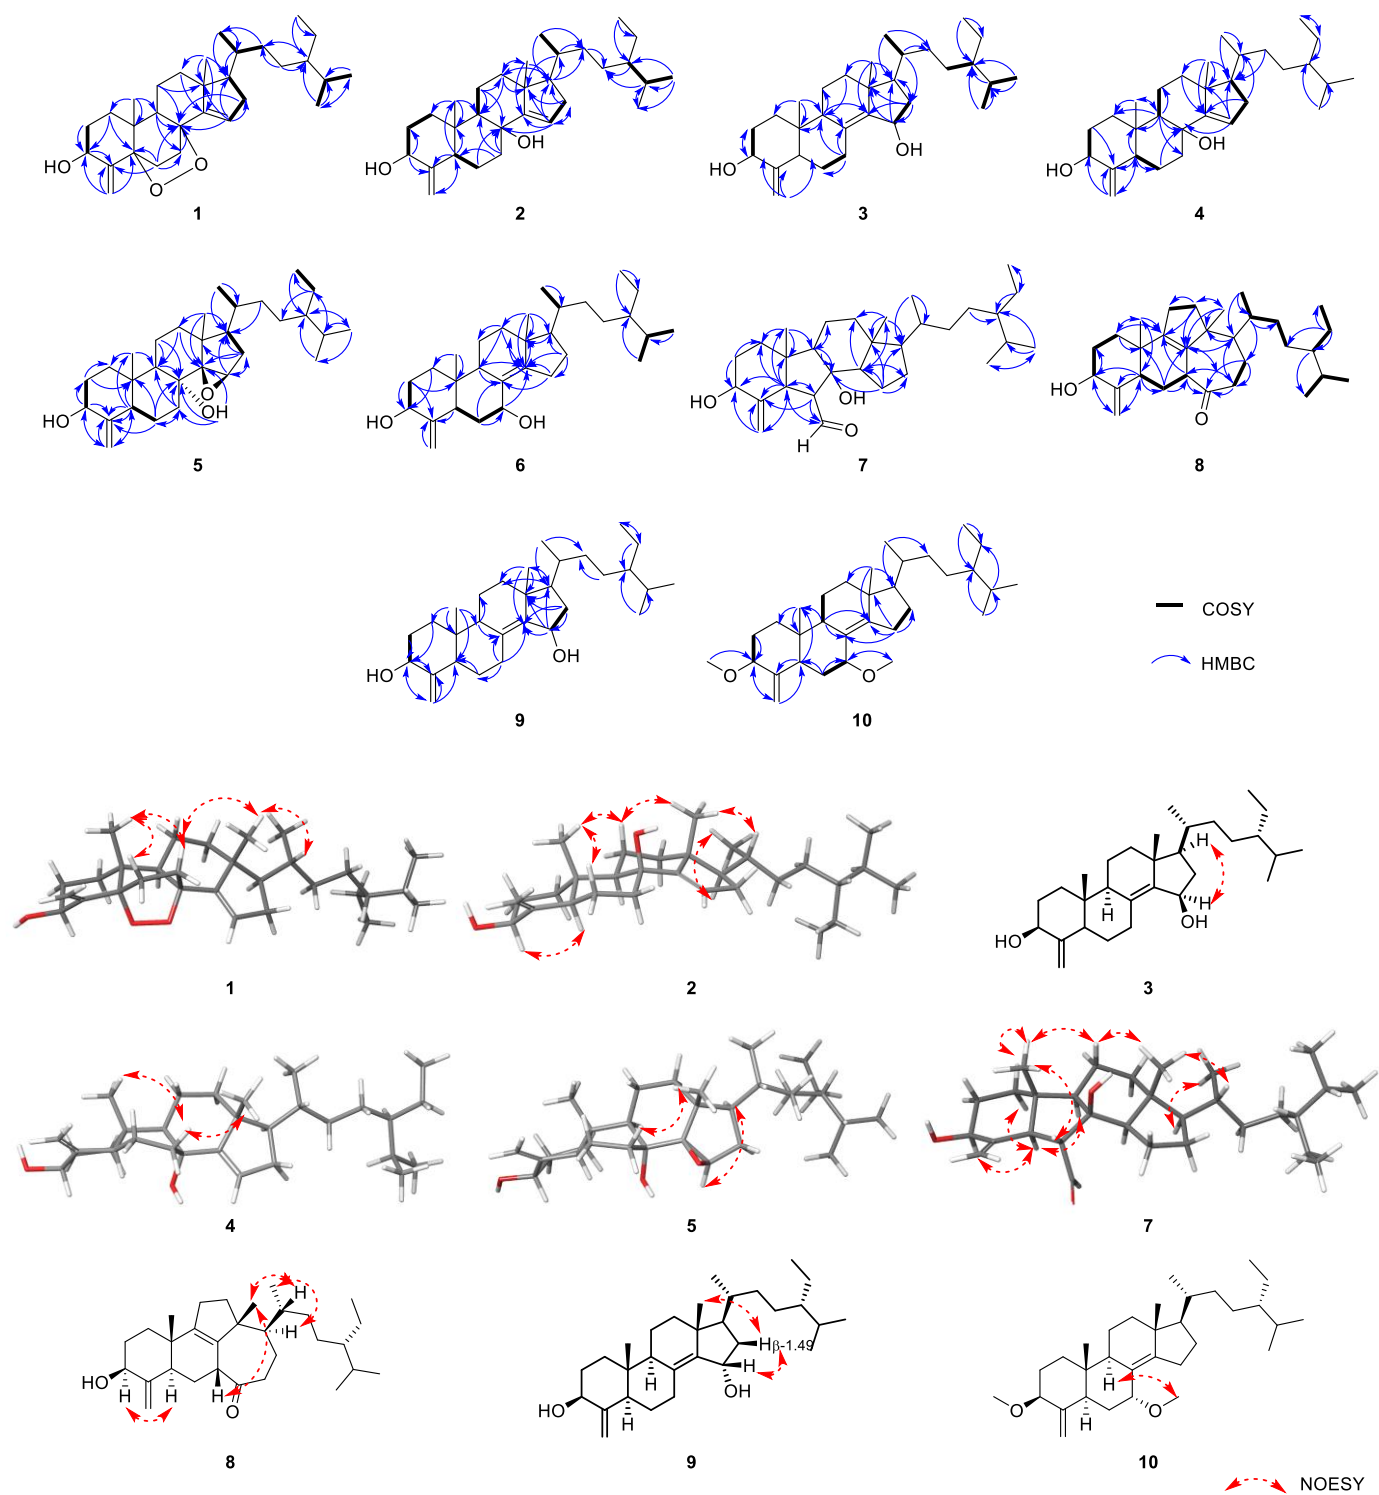

**Figure S3.** Key COSY, HMBC, and NOESY correlations of compounds **1-10**.

## II. Computational methods

### 1. Geometry optimization

All molecular mechanics calculations were performed on Macromodel software (Maestro Materials Science 3.7.013 based on Maestro Core 12.3.013, MMshare Version 4.9.013, Release 2020-1, Platform Windows-x64). All conformational searches were conducted using the Polak-Ribier Conjugate Gradient (PRCG) method, the mixed torsional/low-mode sampling method, and the Optimized Potentials for Liquid Simulation (OPLS3e) force field. Also, the searches were carried out in the gas phase with a 21.0 kJ/mol upper energy limit. The maximum number of steps was set as 1000 to find all of the possible conformers.

Quantum mechanical calculations were performed using Jaguar (version 10.7). The conformers within an energy threshold of 5.0 kJ/mol were used as input structures for DFT calculations employing the mPW91PW1 and the 6-31G\* basis set to output optimized structures, gas phase energies, and Gibbs free energies. Vibrational frequencies computation was implemented at the same level. All optimization was performed “fine” grid density and “ultrafine” accuracy level.

## 2. Transition state for transformation of compound **4** to **9**

The reactant and product were optimized by DFT calculations at the MPW91PW1/6-31G\* basis set. Linear Synchronous Transit (LST) method in Jaguar was used for finding transition state geometry at the same level in the optimization method. All optimization was performed fine grid density and ultrafine accuracy level.

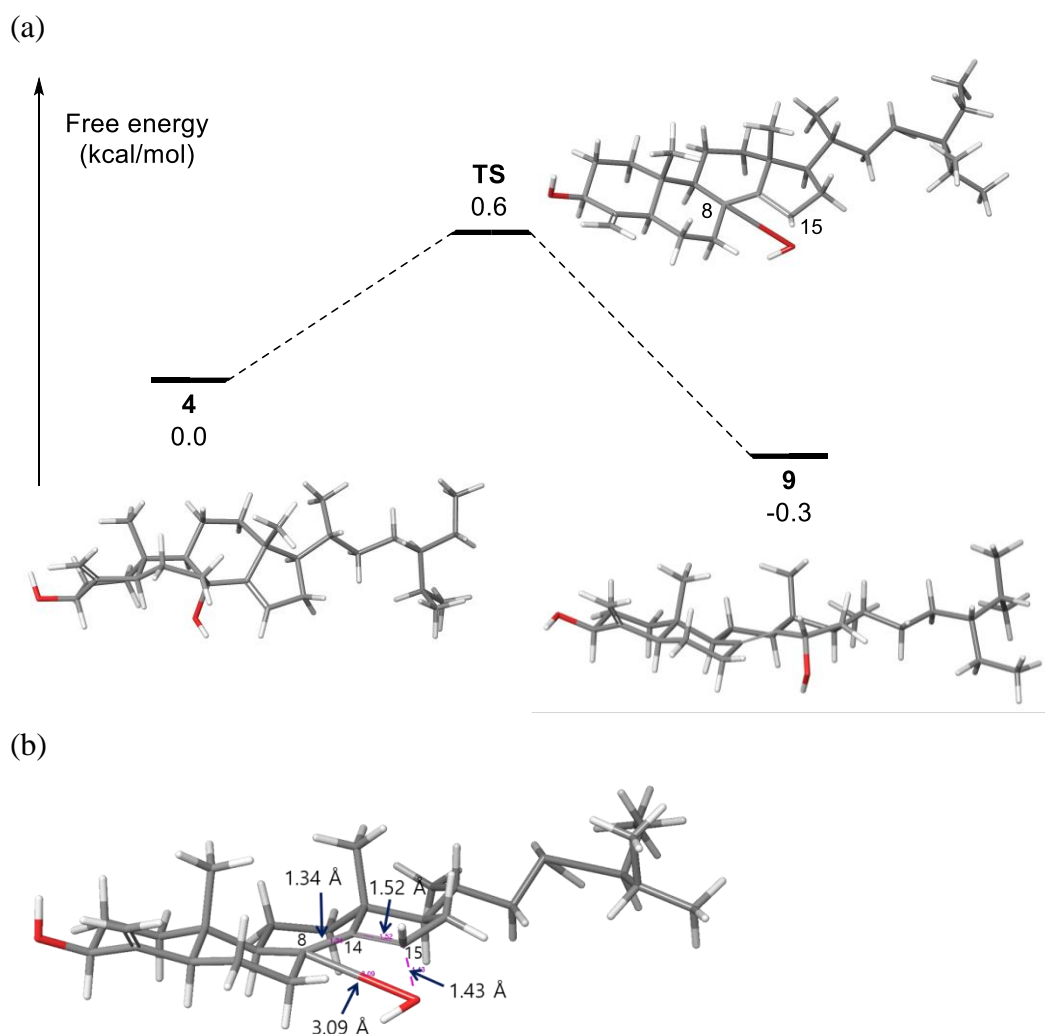

**Figure S4.** (a) Free energy diagram for 1,3-hydroxyl migration in 8 $\alpha$ -hydroxy-theonellasterol **4** to generate 15 $\alpha$ -hydroxy-theonellasterol **9**. (b) Bond lengths for C-8–C-14 and C-14–C15 and atomic distance between C-15 and O-8 in the TS structure.

**Table S3.** Parameters of optimized structures for compounds **4**, **9**, and **TS** in the gas phase.

|                                               | Gas phase energy (hartree) | <sup>a</sup> Gibbs free energy (kcal/mol) | Lowest frequency (cm <sup>-1</sup> ) |
|-----------------------------------------------|----------------------------|-------------------------------------------|--------------------------------------|
| 8 $\alpha$ -hydroxy-theonellasterol <b>4</b>  | -1323.437806               | -36.095072                                | 27.968924                            |
| TS                                            | -1323.277687               | -36.674061                                | -445.948191                          |
| 15 $\alpha$ -hydroxy-theonellasterol <b>9</b> | -1323.456276               | -36.394132                                | 25.953253                            |

<sup>a</sup> 298.15 K 1.0 atm

### 3. $^{13}\text{C}$ chemical shift calculations

Among the optimized structures, the structure that has the lowest gas phase energy was selected. For calculating NMR shielding constant with the GIAO method, single point energy calculations were conducted using the mPW91PW1/6-31G\*\* basis set with CPCM benzene solvent model. All optimization was performed “fine” grid density and “ultrafine” accuracy level. The calculated values of chemical shifts of compound **1-9** were calibrated to the TMS chemical shift computed with the same level of theory.

**Table S4.** The optimized structures of isomers **I–IV** used for  $^{13}\text{C}$  chemical shift calculations.

| Structure                                                                                                                                                                  | Optimized geometry                                                                   |
|----------------------------------------------------------------------------------------------------------------------------------------------------------------------------|--------------------------------------------------------------------------------------|
| 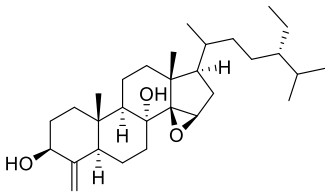 <p><b>5-I</b><br/>(8-<math>\alpha</math>-hydroxy-14,15-<math>\beta</math>-epoxide)</p>   |    |
|  <p><b>5-II</b><br/>(8-<math>\beta</math>-hydroxy-14,15-<math>\beta</math>-epoxide)</p>  |   |
|  <p><b>5-III</b><br/>(8,14-<math>\alpha</math>-epoxy-15-<math>\beta</math>-alcohol)</p> |  |
|  <p><b>5-IV</b><br/>(8,14-<math>\beta</math>-epoxy-15-<math>\beta</math>-alcohol)</p>   |  |

**Table S5.** Parameters of optimized isomers **I–IV** in the gas phase.

|              | Gas phase energy (hartree) | <sup>a</sup> Gibbs free energy (kcal/mol) |
|--------------|----------------------------|-------------------------------------------|
| <b>5-I</b>   | -1398.632101               | -36.093924                                |
| <b>5-II</b>  | -1398.721551               | -36.192753                                |
| <b>5-III</b> | -1398.639529               | -36.532159                                |
| <b>5-IV</b>  | -1398.654758               | -36.522056                                |

<sup>a</sup> 298.15 K 1.0 atm

**Table S6.** Comparison between experimental and calculated  $^{13}\text{C}$  chemical shifts in  $\text{C}_6\text{D}_6$  for isomers **I–IV**.

(unit : ppm)

|     |                         | <b>5-I</b>              |                  | <b>5-II</b>             |                  | <b>5-III</b>            |                  | <b>5-IV</b>             |                  |
|-----|-------------------------|-------------------------|------------------|-------------------------|------------------|-------------------------|------------------|-------------------------|------------------|
| no. | $\delta_{\text{exptl}}$ | $\delta_{\text{calcd}}$ | $ \Delta\delta $ |
| 1   | 41.5                    | 42.25                   | 0.75             | 39.01                   | 2.49             | 37.7                    | 3.8              | 38.2                    | 3.3              |
| 2   | 33.3                    | 35.63                   | 2.33             | 35.10                   | 1.8              | 34.8                    | 1.5              | 35.1                    | 1.8              |
| 3   | 73.8                    | 72.19                   | 1.61             | 71.80                   | 2                | 72.1                    | 1.7              | 71.8                    | 2.0              |
| 4   | 154.3                   | 153.10                  | 1.2              | 151.97                  | 2.33             | 152.2                   | 2.1              | 152.0                   | 2.3              |
| 5   | 41.2                    | 42.08                   | 0.88             | 51.21                   | 10.01            | 49.2                    | 8.0              | 50.3                    | 9.1              |
| 6   | 20.3                    | 21.26                   | 0.96             | 22.73                   | 2.43             | 25.4                    | 5.1              | 24.6                    | 4.3              |
| 7   | 28.3                    | 31.72                   | 3.42             | 35.50                   | 7.2              | 31.9                    | 3.5              | 30.9                    | 2.6              |
| 8   | 71.3                    | 72.36                   | 1.06             | 74.21                   | 2.91             | 63.5                    | 7.8              | 65.0                    | 6.3              |
| 9   | 55.3                    | 51.58                   | 3.72             | 55.13                   | 0.17             | 47.2                    | 8.1              | 50.1                    | 5.2              |
| 10  | 38.2                    | 39.24                   | 1.04             | 41.51                   | 3.31             | 42.1                    | 3.9              | 41.7                    | 3.5              |
| 11  | 23.3                    | 26.10                   | 2.8              | 21.60                   | 1.7              | 21.7                    | 1.6              | 20.0                    | 3.3              |
| 12  | 34.7                    | 41.40                   | 6.7              | 42.38                   | 7.68             | 33.6                    | 1.1              | 38.5                    | 3.8              |
| 13  | 42.5                    | 45.78                   | 3.28             | 47.34                   | 4.84             | 43.4                    | 0.9              | 42.5                    | 0.0              |
| 14  | 75.9                    | 76.40                   | 0.5              | 75.16                   | 0.74             | 80.0                    | 4.1              | 72.1                    | 3.9              |
| 15  | 58.8                    | 60.35                   | 1.55             | 62.52                   | 3.72             | 74.0                    | 15.2             | 65.9                    | 7.1              |
| 16  | 32.3                    | 25.79                   | 6.51             | 27.61                   | 4.69             | 38.8                    | 6.5              | 38.8                    | 6.5              |
| 17  | 49.8                    | 55.36                   | 5.56             | 54.48                   | 4.68             | 54.6                    | 4.8              | 48.5                    | 1.3              |
| 18  | 15.0                    | 18.87                   | 3.87             | 20.08                   | 5.08             | 16.2                    | 1.2              | 16.8                    | 1.8              |
| 19  | 17.2                    | 21.26                   | 4.06             | 16.48                   | 0.72             | 17.2                    | 0.0              | 15.6                    | 1.7              |
| 20  | 34.4                    | 36.65                   | 2.25             | 35.22                   | 0.82             | 38.5                    | 4.1              | 34.5                    | 0.1              |
| 21  | 19.2                    | 21.54                   | 2.34             | 23.04                   | 3.84             | 19.2                    | 0.0              | 20.8                    | 1.6              |
| 22  | 34.1                    | 31.51                   | 2.59             | 31.93                   | 2.17             | 35.7                    | 1.6              | 36.0                    | 1.8              |
| 23  | 27.1                    | 31.06                   | 3.96             | 29.34                   | 2.24             | 28.7                    | 1.6              | 22.6                    | 4.5              |
| 24  | 46.8                    | 47.34                   | 0.54             | 45.79                   | 1.01             | 45.3                    | 1.5              | 45.5                    | 1.3              |
| 25  | 29.6                    | 28.88                   | 0.72             | 26.12                   | 3.48             | 28.6                    | 1.0              | 28.0                    | 1.6              |
| 26  | 19.4                    | 15.36                   | 4.04             | 14.53                   | 4.87             | 16.6                    | 2.8              | 15.8                    | 3.6              |
| 27  | 20.1                    | 22.67                   | 2.57             | 28.60                   | 8.5              | 22.8                    | 2.7              | 22.5                    | 2.4              |
| 28  | 23.7                    | 22.77                   | 0.93             | 22.79                   | 0.91             | 25.8                    | 2.1              | 25.8                    | 2.1              |
| 29  | 12.9                    | 14.70                   | 1.8              | 16.24                   | 3.34             | 14.2                    | 1.3              | 15.2                    | 2.3              |
| 30  | 103.4                   | 102.36                  | 1.04             | 103.13                  | 0.27             | 104.8                   | 1.4              | 104.1                   | 0.7              |

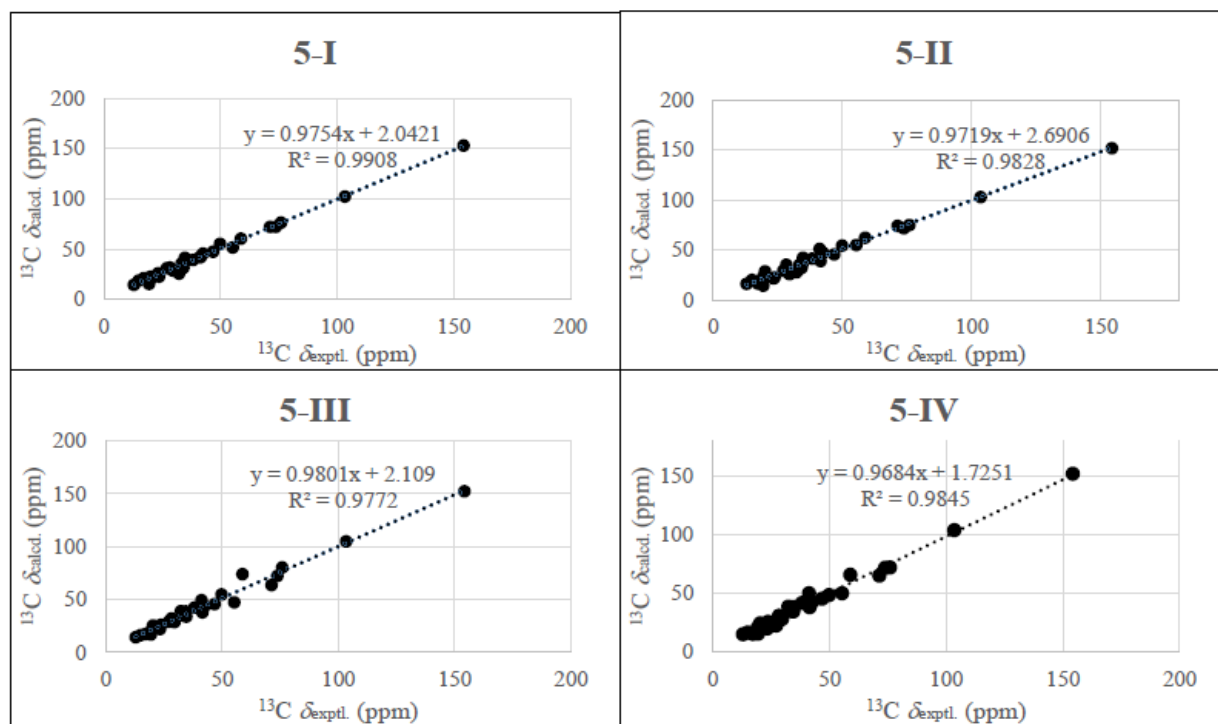

**Figure S5.** Linear regression analyses of the experimental and calculated  $^{13}\text{C}$  NMR data for isomers **I-IV**.

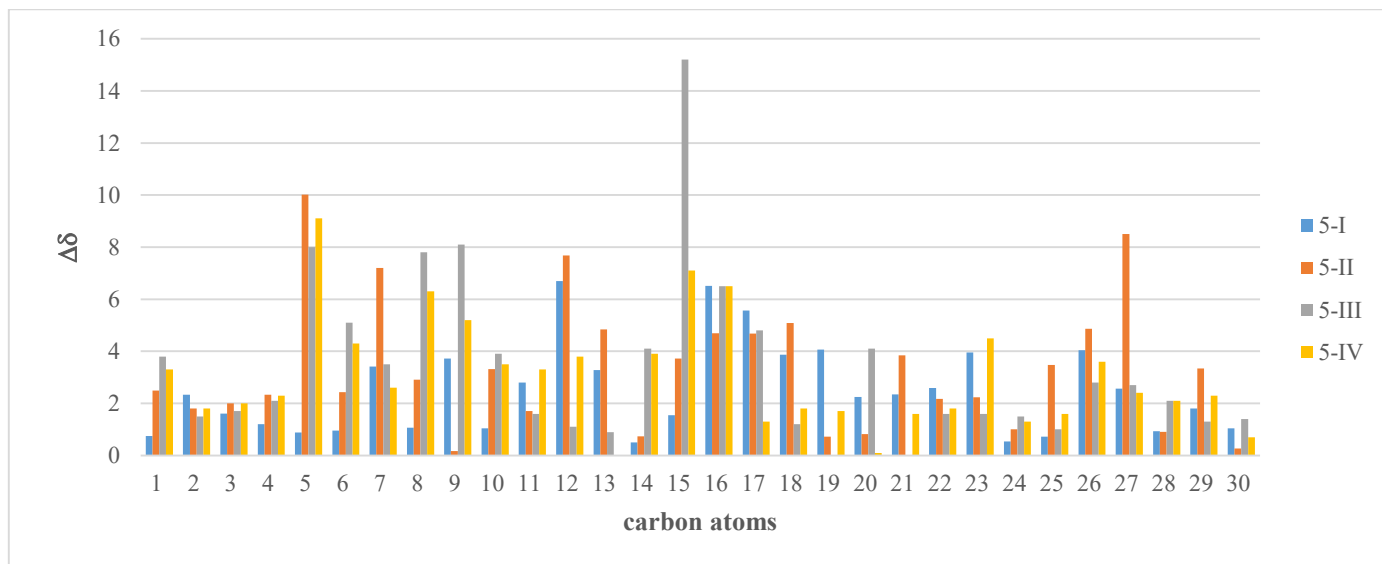

**Figure S6.** Comparison of  $|\delta_{\text{exptl}} - \delta_{\text{calcd}}|$  values (parts per million) in  $\text{C}_6\text{D}_6$  for isomers **I-IV**.

| Functional<br>mPW1PW91 |      | Solvent?<br>PCM |          | Basis Set<br>6-31G(d,p) |          | Type of Data<br>Shielding Tensors |          |
|------------------------|------|-----------------|----------|-------------------------|----------|-----------------------------------|----------|
|                        |      | DP4+            | 100.00%  | 0.00%                   | 0.00%    | 0.00%                             | -        |
| Nuclei                 | sp2? | Experimental    | Isomer 1 | Isomer 2                | Isomer 3 | Isomer 4                          | Isomer 5 |
| C                      | x    | 41.50           | 42.3     | 39.0                    | 37.68    | 38.19                             |          |
| C                      | x    | 33.30           | 35.6     | 35.1                    | 34.80    | 35.10                             |          |
| C                      | x    | 73.80           | 72.2     | 71.8                    | 72.12    | 71.79                             |          |
| C                      |      | 154.30          | 153.1    | 152.0                   | 152.20   | 151.99                            |          |
| C                      | x    | 41.20           | 42.1     | 51.2                    | 49.15    | 50.25                             |          |
| C                      | x    | 20.30           | 21.3     | 22.7                    | 25.42    | 24.57                             |          |
| C                      | x    | 28.30           | 31.7     | 35.5                    | 31.85    | 30.94                             |          |
| C                      | x    | 71.30           | 72.4     | 74.2                    | 63.49    | 65.03                             |          |
| C                      | x    | 55.30           | 51.6     | 55.1                    | 47.22    | 50.09                             |          |
| C                      | x    | 38.20           | 39.2     | 41.5                    | 42.13    | 41.73                             |          |
| C                      | x    | 23.30           | 26.1     | 21.6                    | 21.69    | 20.02                             |          |
| C                      | x    | 34.70           | 41.40    | 42.38                   | 33.60    | 38.47                             |          |
| C                      | x    | 42.50           | 45.78    | 47.34                   | 43.38    | 42.51                             |          |
| C                      | x    | 75.90           | 76.40    | 75.16                   | 80.04    | 72.05                             |          |
| C                      | x    | 58.80           | 60.35    | 62.52                   | 73.97    | 65.88                             |          |
| C                      | x    | 32.30           | 25.79    | 27.61                   | 38.75    | 38.81                             |          |
| C                      | x    | 49.80           | 55.36    | 54.48                   | 54.59    | 48.50                             |          |
| C                      | x    | 15.00           | 18.87    | 20.08                   | 16.17    | 16.82                             |          |
| C                      | x    | 17.20           | 21.26    | 16.48                   | 17.24    | 15.55                             |          |
| C                      | x    | 34.40           | 36.65    | 35.22                   | 38.49    | 34.49                             |          |
| C                      | x    | 19.20           | 21.54    | 23.04                   | 19.15    | 20.81                             |          |
| C                      | x    | 34.10           | 31.51    | 31.93                   | 35.66    | 35.95                             |          |
| C                      | x    | 27.10           | 31.06    | 29.34                   | 28.68    | 22.61                             |          |
| C                      | x    | 46.80           | 47.34    | 45.79                   | 45.30    | 45.54                             |          |
| C                      | x    | 29.60           | 28.88    | 26.12                   | 28.57    | 28.04                             |          |
| C                      | x    | 19.40           | 15.36    | 14.53                   | 16.58    | 15.80                             |          |
| C                      | x    | 20.10           | 22.67    | 28.6                    | 22.82    | 22.51                             |          |
| C                      | x    | 23.70           | 22.77    | 22.79                   | 25.82    | 25.80                             |          |
| C                      | x    | 12.90           | 14.7     | 16.24                   | 14.21    | 15.18                             |          |
| C                      |      | 103.40          | 102.36   | 103.13                  | 104.80   | 104.08                            |          |

| Functional<br>mPW1PW91 | Solvent?<br>PCM                |                               | Basis Set<br>6-31G(d,p)       |                              | Type of Data<br>Shielding Tensors |          |
|------------------------|--------------------------------|-------------------------------|-------------------------------|------------------------------|-----------------------------------|----------|
|                        | Isomer 1                       | Isomer 2                      | Isomer 3                      | Isomer 4                     | Isomer 5                          | Isomer 6 |
| sDP4+ (H data)         | -                              | -                             | -                             | -                            | -                                 | -        |
| sDP4+ (C data)         | <div><div></div></div> 100.00% | <div><div></div></div> 0.00%  | <div><div></div></div> 0.00%  | <div><div></div></div> 0.00% | -                                 | -        |
| sDP4+ (all data)       | <div><div></div></div> 100.00% | <div><div></div></div> 0.00%  | <div><div></div></div> 0.00%  | <div><div></div></div> 0.00% | -                                 | -        |
| uDP4+ (H data)         | -                              | -                             | -                             | -                            | -                                 | -        |
| uDP4+ (C data)         | <div><div></div></div> 32.86%  | <div><div></div></div> 43.92% | <div><div></div></div> 17.39% | <div><div></div></div> 5.83% | -                                 | -        |
| uDP4+ (all data)       | <div><div></div></div> 32.86%  | <div><div></div></div> 43.92% | <div><div></div></div> 17.39% | <div><div></div></div> 5.83% | -                                 | -        |
| DP4+ (H data)          | -                              | -                             | -                             | -                            | -                                 | -        |
| DP4+ (C data)          | <div><div></div></div> 100.00% | <div><div></div></div> 0.00%  | <div><div></div></div> 0.00%  | <div><div></div></div> 0.00% | -                                 | -        |
| DP4+ (all data)        | <div><div></div></div> 100.00% | <div><div></div></div> 0.00%  | <div><div></div></div> 0.00%  | <div><div></div></div> 0.00% | -                                 | -        |

Figure S7. DP4+ probability analyses for isomers I-IV.

**Table S7.** Optimized Z-matrixes of isomer **5-I** in the gas phase (Å).

| atom | x        | y        | z        | atom | x        | y        | z        | atom | x        | y        | z        |
|------|----------|----------|----------|------|----------|----------|----------|------|----------|----------|----------|
| C1   | -1.06604 | -6.97905 | -0.10914 | C29  | -8.97037 | 0.611178 | -0.8433  | H57  | -1.21454 | -9.27662 | -1.55034 |
| C2   | -0.46232 | -8.16911 | 0.589947 | C30  | -5.28827 | 1.123875 | 1.535174 | H58  | -2.6741  | -8.42799 | -2.00483 |
| C3   | -0.93544 | -7.11887 | -1.65795 | C31  | -4.766   | 2.438005 | -0.5437  | H59  | 1.201783 | -10.2256 | 0.531424 |
| C4   | 0.575941 | -7.17898 | -1.95545 | O32  | -2.57955 | -2.33428 | -1.4535  | H60  | -0.58367 | -9.79762 | 1.922413 |
| C5   | 1.289381 | -8.31125 | -1.21359 | O33  | -0.71293 | -4.23333 | -0.85158 | H61  | -2.16814 | -8.89337 | 1.619234 |
| C6   | 1.018695 | -8.31995 | 0.298464 | H34  | -0.42835 | -6.12794 | 0.159015 | H62  | -5.87779 | -2.04073 | -3.80168 |
| C7   | -2.48278 | -6.59331 | 0.292029 | H35  | 0.738987 | -7.29237 | -3.03529 | H63  | -4.80868 | -1.44962 | -1.61705 |
| C8   | -2.84983 | -5.2029  | -0.26173 | H36  | 1.017724 | -6.21574 | -1.67225 | H64  | -4.0324  | -0.0901  | -2.36662 |
| C9   | -1.93226 | -4.72542 | -1.40897 | H37  | 0.973856 | -9.28133 | -1.62056 | H65  | -5.07527 | -0.99364 | -5.89908 |
| C10  | -1.55649 | -5.85917 | -2.38247 | H38  | 2.371193 | -8.25171 | -1.37156 | H66  | -5.90787 | 0.170666 | -4.86641 |
| C11  | -2.57367 | -3.57241 | -2.18125 | H39  | 1.529351 | -7.45483 | 0.742044 | H67  | -4.1469  | 0.190412 | -4.96947 |
| C12  | -3.72748 | -3.77627 | -3.16621 | H40  | -3.19152 | -7.34576 | -0.07282 | H68  | -6.1406  | 1.056807 | -2.72892 |
| C13  | -3.22178 | -4.91742 | -4.07892 | H41  | -2.57695 | -6.59408 | 1.382484 | H69  | -7.05468 | -0.41965 | -2.51876 |
| C14  | -2.74825 | -6.15276 | -3.3111  | H42  | -3.89312 | -5.19587 | -0.57958 | H70  | -6.58494 | -0.50171 | -0.15178 |
| C15  | -3.78376 | -2.44565 | -4.00976 | H43  | -2.78061 | -4.44588 | 0.527261 | H71  | -4.32357 | 0.380978 | -0.19775 |
| C16  | -2.37749 | -1.81152 | -3.86503 | H44  | -0.76774 | -5.4338  | -3.01815 | H72  | -7.73127 | 1.640431 | 0.563562 |
| C17  | -1.77102 | -2.43749 | -2.64135 | H45  | -4.01976 | -5.19737 | -4.77807 | H73  | -7.57272 | 2.231866 | -1.07775 |
| C18  | -5.08617 | -4.16388 | -2.57845 | H46  | -2.38963 | -4.54456 | -4.69133 | H74  | -9.02692 | 0.362765 | -1.90713 |
| C19  | -1.58841 | -8.42931 | -2.12726 | H47  | -2.46536 | -6.91974 | -4.03729 | H75  | -9.83211 | 1.245238 | -0.61262 |
| O20  | 1.617662 | -9.44077 | 0.913969 | H48  | -3.58361 | -6.57633 | -2.74163 | H76  | -9.0852  | -0.32064 | -0.27843 |
| C21  | -1.10909 | -8.99913 | 1.409164 | H49  | -3.91458 | -2.7625  | -5.05242 | H77  | -4.33378 | 1.400557 | 1.995036 |
| C22  | -4.94997 | -1.45388 | -3.76843 | H50  | -1.7401  | -2.04712 | -4.72454 | H78  | -6.02783 | 1.863844 | 1.858927 |
| C23  | -4.92781 | -0.72014 | -2.42172 | H51  | -2.40959 | -0.72023 | -3.79133 | H79  | -5.58517 | 0.152365 | 1.945369 |
| C24  | -5.02314 | -0.46762 | -4.93959 | H52  | -0.70161 | -2.38857 | -2.46209 | H80  | -5.53076 | 3.191412 | -0.32652 |
| C25  | -6.1754  | 0.124589 | -2.1503  | H53  | -5.85239 | -4.12988 | -3.35958 | H81  | -3.83035 | 2.784808 | -0.09287 |
| C26  | -6.40382 | 0.456605 | -0.66537 | H54  | -5.09039 | -5.18388 | -2.18823 | H82  | -4.61892 | 2.414832 | -1.62815 |
| C27  | -5.15371 | 1.066996 | 0.011992 | H55  | -5.39887 | -3.49701 | -1.772   | H83  | -0.96242 | -3.42187 | -0.38006 |
| C28  | -7.66498 | 1.315399 | -0.48081 | H56  | -1.37326 | -8.62675 | -3.18246 |      |          |          |          |



**Table S8.** Optimized Z-matrixes isomer **5-II** in the gas phase (Å ).

| atom | x        | y        | z        | atom | x        | y        | z        | atom | x        | y        | z        |
|------|----------|----------|----------|------|----------|----------|----------|------|----------|----------|----------|
| C1   | -1.06604 | -6.97905 | -0.10914 | C29  | 1.914596 | -1.74323 | 2.319544 | H57  | -5.06173 | -1.56256 | -2.9246  |
| C2   | -0.46232 | -8.16911 | 0.589947 | C30  | 2.91998  | 2.089219 | 3.344305 | H58  | -5.93963 | -0.25095 | -3.7117  |
| C3   | -0.93544 | -7.11887 | -1.65795 | C31  | 4.909861 | 1.466901 | 1.940267 | H59  | -7.49744 | -3.47804 | -7.06977 |
| C4   | 0.575941 | -7.17898 | -1.95545 | O32  | 0.041082 | -0.86211 | -2.51264 | H60  | -6.29371 | -5.10213 | -6.01333 |
| C5   | 1.289381 | -8.31125 | -1.21359 | O33  | -2.95835 | -1.21834 | -2.26276 | H61  | -5.05675 | -5.02142 | -4.64235 |
| C6   | 1.018695 | -8.31995 | 0.298464 | H34  | -3.24662 | -2.39678 | -6.25471 | H62  | 0.306649 | 2.895176 | -1.11679 |
| C7   | -2.48278 | -6.59331 | 0.292029 | H35  | -5.39095 | 0.511948 | -5.98473 | H63  | 1.032497 | 0.397814 | -0.91646 |
| C8   | -2.84983 | -5.2029  | -0.26173 | H36  | -4.20813 | -0.33778 | -6.96763 | H64  | 2.597951 | 0.928876 | -1.46306 |
| C9   | -1.93226 | -4.72542 | -1.40897 | H37  | -6.99827 | -1.33197 | -6.19291 | H65  | 2.778375 | 3.012868 | -2.90855 |
| C10  | -1.55649 | -5.85917 | -2.38247 | H38  | -6.47969 | -0.8112  | -7.78831 | H66  | 1.571766 | 4.287956 | -2.6907  |
| C11  | -2.57367 | -3.57241 | -2.18125 | H39  | -4.9748  | -2.7052  | -8.0012  | H67  | 2.615361 | 3.817916 | -1.34685 |
| C12  | -3.72748 | -3.77627 | -3.16621 | H40  | -3.71833 | -3.42785 | -3.42846 | H68  | 2.80966  | 2.499022 | 0.426278 |
| C13  | -3.22178 | -4.91742 | -4.07892 | H41  | -2.82957 | -4.27667 | -4.68992 | H69  | 1.190806 | 2.117446 | 0.975707 |
| C14  | -2.74825 | -6.15276 | -3.3111  | H42  | -1.25491 | -2.96945 | -3.26162 | H70  | 3.245672 | -0.09118 | 0.656591 |
| C15  | -3.78376 | -2.44565 | -4.00976 | H43  | -1.26808 | -2.3781  | -4.91747 | H71  | 3.739331 | 0.13593  | 3.106526 |
| C16  | -2.37749 | -1.81152 | -3.86503 | H44  | -2.53201 | -0.23834 | -5.40931 | H72  | 0.933845 | 0.155984 | 2.622582 |
| C17  | -1.77102 | -2.43749 | -2.64135 | H45  | -2.40778 | 2.905822 | -3.52264 | H73  | 0.75587  | -0.50576 | 1.014606 |
| C18  | -5.08617 | -4.16388 | -2.57845 | H46  | -1.67453 | 1.958465 | -4.80847 | H74  | 2.590701 | -1.68319 | 3.177995 |
| C19  | -1.58841 | -8.42931 | -2.12726 | H47  | -4.10178 | 1.598347 | -4.734   | H75  | 1.049976 | -2.33863 | 2.629507 |
| O20  | 1.617662 | -9.44077 | 0.913969 | H48  | -4.0225  | 1.030031 | -3.07615 | H76  | 2.431934 | -2.29761 | 1.528854 |
| C21  | -1.10909 | -8.99913 | 1.409164 | H49  | 0.055352 | 2.830423 | -3.59024 | H77  | 2.766693 | 3.019066 | 2.786379 |
| C22  | -4.94997 | -1.45388 | -3.76843 | H50  | 1.017093 | 1.254019 | -4.96994 | H78  | 1.951616 | 1.78101  | 3.750357 |
| C23  | -4.92781 | -0.72014 | -2.42172 | H51  | 2.068618 | 0.828868 | -3.62854 | H79  | 3.571823 | 2.321706 | 4.192824 |
| C24  | -5.02314 | -0.46762 | -4.93959 | H52  | 0.499932 | -1.16918 | -4.5656  | H80  | 4.82006  | 2.343802 | 1.289651 |
| C25  | -6.1754  | 0.124589 | -2.1503  | H53  | -1.10491 | 0.964728 | -0.65059 | H81  | 5.574675 | 1.742475 | 2.765896 |
| C26  | -6.40382 | 0.456605 | -0.66537 | H54  | -1.83766 | 2.495402 | -1.14787 | H82  | 5.402078 | 0.675303 | 1.365237 |
| C27  | -5.15371 | 1.066996 | 0.011992 | H55  | -2.7396  | 0.982662 | -1.30789 | H83  | -2.31692 | -1.55764 | -1.62192 |
| C28  | -7.66498 | 1.315399 | -0.48081 | H56  | -6.2783  | -1.92706 | -4.15371 |      |          |          |          |

**Table S9.** Optimized Z-matrixes of **5-III** in the gas phase (Å ).

| atom | x        | y        | z        | atom | x        | y        | z        | atom | x        | y        | z        |
|------|----------|----------|----------|------|----------|----------|----------|------|----------|----------|----------|
| C1   | -10.0697 | -1.95292 | -1.46445 | C29  | -11.5994 | 9.728055 | 6.630673 | H57  | -11.535  | -1.52001 | 0.632501 |
| C2   | -9.89427 | -0.48297 | -1.14437 | C30  | -10.1641 | 7.68819  | 7.230288 | H58  | -11.1131 | -0.03643 | 1.481335 |
| C3   | -11.2354 | 0.180393 | -0.69859 | C31  | -8.96561 | 8.387334 | 7.864986 | H59  | -11.6448 | -4.02371 | -2.02054 |
| C4   | -12.2846 | -0.10029 | -1.79158 | O32  | -12.8933 | 9.397181 | 7.376716 | H60  | -9.51662 | -3.969   | -1.22162 |
| C5   | -12.4466 | -1.58243 | -2.11677 | O33  | -11.8678 | 10.73835 | 5.513815 | H61  | -8.62983 | -2.77024 | -0.13267 |
| C6   | -11.1213 | -2.23438 | -2.51769 | H34  | -9.61902 | 0.007016 | -2.09488 | H62  | -8.68314 | 1.185052 | 2.968071 |
| C7   | -8.7742  | -0.18901 | -0.15264 | H35  | -13.2536 | 0.314637 | -1.4941  | H63  | -11.9836 | 4.858235 | 4.444511 |
| C8   | -8.55687 | 1.312837 | -0.02924 | H36  | -11.9884 | 0.433517 | -2.70593 | H64  | -10.0566 | 6.352826 | 4.724125 |
| C9   | -9.81674 | 2.112904 | 0.247916 | H37  | -12.8464 | -2.11801 | -1.24451 | H65  | -10.6273 | 7.397681 | 3.439645 |
| C10  | -11.0362 | 1.726234 | -0.58962 | H38  | -13.1682 | -1.72201 | -2.92828 | H66  | -13.6319 | 6.583493 | 3.661605 |
| C11  | -9.982   | 2.933963 | 1.461089 | H39  | -10.7876 | -1.7837  | -3.46232 | H67  | -12.8155 | 6.64176  | 2.09377  |
| C12  | -11.3226 | 3.500109 | 1.931492 | H40  | -9.0107  | -0.63285 | 0.821804 | H68  | -13.6319 | 5.166704 | 2.62497  |
| C13  | -12.1761 | 3.734407 | 0.676647 | H41  | -7.84472 | -0.65994 | -0.4884  | H69  | -12.5175 | 8.138138 | 4.750884 |
| C14  | -12.3338 | 2.459434 | -0.16634 | H42  | -7.78924 | 1.54266  | 0.716235 | H70  | -12.3007 | 6.87083  | 5.941873 |
| C15  | -10.7924 | 4.781378 | 2.655872 | H43  | -8.1637  | 1.689552 | -0.98293 | H71  | -10.0603 | 8.848601 | 5.439419 |
| C16  | -9.49608 | 4.295652 | 3.360259 | H44  | -10.7733 | 2.065697 | -1.60322 | H72  | -10.9282 | 10.22291 | 7.344965 |
| C17  | -8.97973 | 3.069699 | 2.593267 | H45  | -13.1795 | 4.073078 | 0.949676 | H73  | -10.9005 | 7.440348 | 8.005678 |
| C18  | -9.53848 | 3.520571 | 0.22745  | H46  | -11.7204 | 4.52705  | 0.077829 | H74  | -9.82788 | 6.724201 | 6.829122 |
| C19  | -12.0257 | 2.564668 | 2.924197 | H47  | -12.905  | 2.712222 | -1.06561 | H75  | -8.49822 | 7.75072  | 8.62274  |
| O20  | -11.6812 | -0.43657 | 0.63739  | H48  | -12.9692 | 1.767775 | 0.394313 | H76  | -8.20345 | 8.621451 | 7.113462 |
| C21  | -11.2877 | -3.60364 | -2.81524 | H49  | -10.5014 | 5.48164  | 1.859402 | H77  | -9.24372 | 9.324769 | 8.356184 |
| C22  | -9.37599 | -2.94278 | -0.89999 | H50  | -8.73997 | 5.082036 | 3.405937 | H78  | -13.6409 | 8.95856  | 6.707199 |
| C23  | -8.97275 | 1.955024 | 3.474446 | H51  | -9.70239 | 3.985621 | 4.390409 | H79  | -12.7285 | 8.693549 | 8.198462 |
| C24  | -11.7223 | 5.540477 | 3.621675 | H52  | -7.97824 | 3.240895 | 2.180312 | H80  | -13.332  | 10.30415 | 7.80541  |
| C25  | -10.9665 | 6.728606 | 4.244005 | H53  | -12.9594 | 3.014746 | 3.276474 | H81  | -12.5407 | 10.33293 | 4.750135 |
| C26  | -13.0206 | 6.005916 | 2.963037 | H54  | -12.2795 | 1.607198 | 2.464792 | H82  | -12.3371 | 11.64461 | 5.911185 |
| C27  | -11.7546 | 7.547705 | 5.269322 | H55  | -11.3999 | 2.347243 | 3.792073 | H83  | -10.9391 | 11.03504 | 5.014829 |
| C28  | -10.8552 | 8.477319 | 6.105763 | H56  | -12.7405 | -0.25324 | 0.839679 |      |          |          |          |

**Table S10.** Optimized Z-matrixes of **5-IV** in the gas phase (Å ).

| atom | x        | y        | z        | atom | x        | y        | z        | atom | x        | y        | z        |
|------|----------|----------|----------|------|----------|----------|----------|------|----------|----------|----------|
| C1   | -5.81275 | 2.70178  | -4.70469 | C29  | -12.2709 | 3.203873 | -14.9819 | H57  | -4.06958 | 1.158988 | -5.98824 |
| C2   | -6.4018  | 2.530672 | -6.08748 | C30  | -10.4452 | 3.156389 | -16.7806 | H58  | -4.87745 | 0.365273 | -7.34249 |
| C3   | -5.29169 | 2.511919 | -7.18723 | C31  | -11.2921 | 2.890218 | -18.0214 | H59  | -3.78766 | 3.402555 | -3.13155 |
| C4   | -4.47011 | 3.806516 | -7.03244 | O32  | -12.0297 | 4.582018 | -14.3629 | H60  | -5.58667 | 2.075825 | -2.70766 |
| C5   | -3.89624 | 4.001698 | -5.63165 | O33  | -13.0465 | 2.309832 | -14.0129 | H61  | -6.57994 | 0.949525 | -3.78348 |
| C6   | -4.97556 | 3.95495  | -4.54745 | H34  | -6.98313 | 3.450351 | -6.28102 | H62  | -8.00257 | -1.23578 | -9.22986 |
| C7   | -7.37569 | 1.362639 | -6.22343 | H35  | -6.60052 | 3.435678 | -8.60341 | H63  | -7.07262 | 0.397729 | -14.0416 |
| C8   | -8.04777 | 1.365189 | -7.59492 | H36  | -8.374   | 2.279712 | -12.0397 | H64  | -8.61033 | 1.252891 | -15.6864 |
| C9   | -7.01702 | 1.392265 | -8.69762 | H37  | -3.64961 | 3.818342 | -7.7573  | H65  | -9.43479 | 0.361711 | -14.4321 |
| C10  | -5.99753 | 2.51267  | -8.57276 | H38  | -5.11273 | 4.664691 | -7.27785 | H66  | -7.06214 | 3.456353 | -13.9066 |
| C11  | -7.30929 | 0.802782 | -10.0143 | H39  | -3.15755 | 3.217168 | -5.41797 | H67  | -5.67286 | 2.370945 | -13.9331 |
| C12  | -6.63323 | 1.236679 | -11.3245 | H40  | -3.36689 | 4.957761 | -5.56291 | H68  | -6.6812  | 2.535586 | -15.3658 |
| C13  | -5.87206 | 2.552881 | -11.0955 | H41  | -5.63511 | 4.823576 | -4.68005 | H69  | -10.3125 | 2.381772 | -13.4195 |
| C14  | -5.07228 | 2.557355 | -9.79007 | H42  | -6.85128 | 0.411943 | -6.07623 | H70  | -9.32219 | 3.418427 | -14.4254 |
| C15  | -7.86167 | 1.336771 | -12.288  | H43  | -8.1384  | 1.425062 | -5.44065 | H71  | -11.2511 | 1.480268 | -15.7264 |
| C16  | -8.76507 | 0.176601 | -11.8352 | H44  | -8.68157 | 2.257134 | -7.68991 | H72  | -12.9164 | 3.349177 | -15.8582 |
| C17  | -8.68348 | 0.184658 | -10.3103 | H45  | -8.69654 | 0.493052 | -7.71217 | H73  | -10.335  | 4.238644 | -16.6338 |
| C18  | -6.50407 | 0.088411 | -9.06845 | H46  | -5.1942  | 2.74876  | -11.9311 | H74  | -9.43128 | 2.78263  | -16.9683 |
| C19  | -5.66266 | 0.133682 | -11.7696 | H47  | -6.58658 | 3.387532 | -11.0738 | H75  | -10.8405 | 3.345105 | -18.9086 |
| O20  | -4.38128 | 1.285469 | -7.02856 | H48  | -4.4616  | 3.464515 | -9.75381 | H76  | -11.3845 | 1.815155 | -18.211  |
| C21  | -4.41988 | 4.122931 | -3.26125 | H49  | -4.37787 | 1.711416 | -9.77114 | H77  | -12.3038 | 3.296764 | -17.9284 |
| C22  | -5.9967  | 1.858353 | -3.68802 | H50  | -9.79443 | 0.273056 | -12.1889 | H78  | -11.4494 | 4.509457 | -13.4368 |
| C23  | -8.83242 | -1.08067 | -9.7119  | H51  | -8.38354 | -0.78159 | -12.2056 | H79  | -11.4928 | 5.252421 | -15.041  |
| C24  | -7.59671 | 1.333904 | -13.8048 | H52  | -9.46457 | 0.850758 | -9.91525 | H80  | -12.9814 | 5.062663 | -14.1138 |
| C25  | -8.89989 | 1.298706 | -14.6285 | H53  | -5.14772 | 0.417471 | -12.6923 | H81  | -12.4795 | 2.113743 | -13.0961 |
| C26  | -6.70478 | 2.488065 | -14.2718 | H54  | -4.90917 | -0.05144 | -11.0015 | H82  | -13.9894 | 2.781076 | -13.7157 |
| C27  | -9.86757 | 2.465938 | -14.4182 | H55  | -6.17603 | -0.8154  | -11.9478 | H83  | -13.2861 | 1.343298 | -14.4687 |
| C28  | -10.9773 | 2.519685 | -15.4855 | H56  | -3.47695 | 1.39037  | -7.63646 |      |          |          |          |

### III. Determination of the C-24 configuration

#### 1. The list of compounds selected for a database

##### (1) (21*R*,24*S*)-set

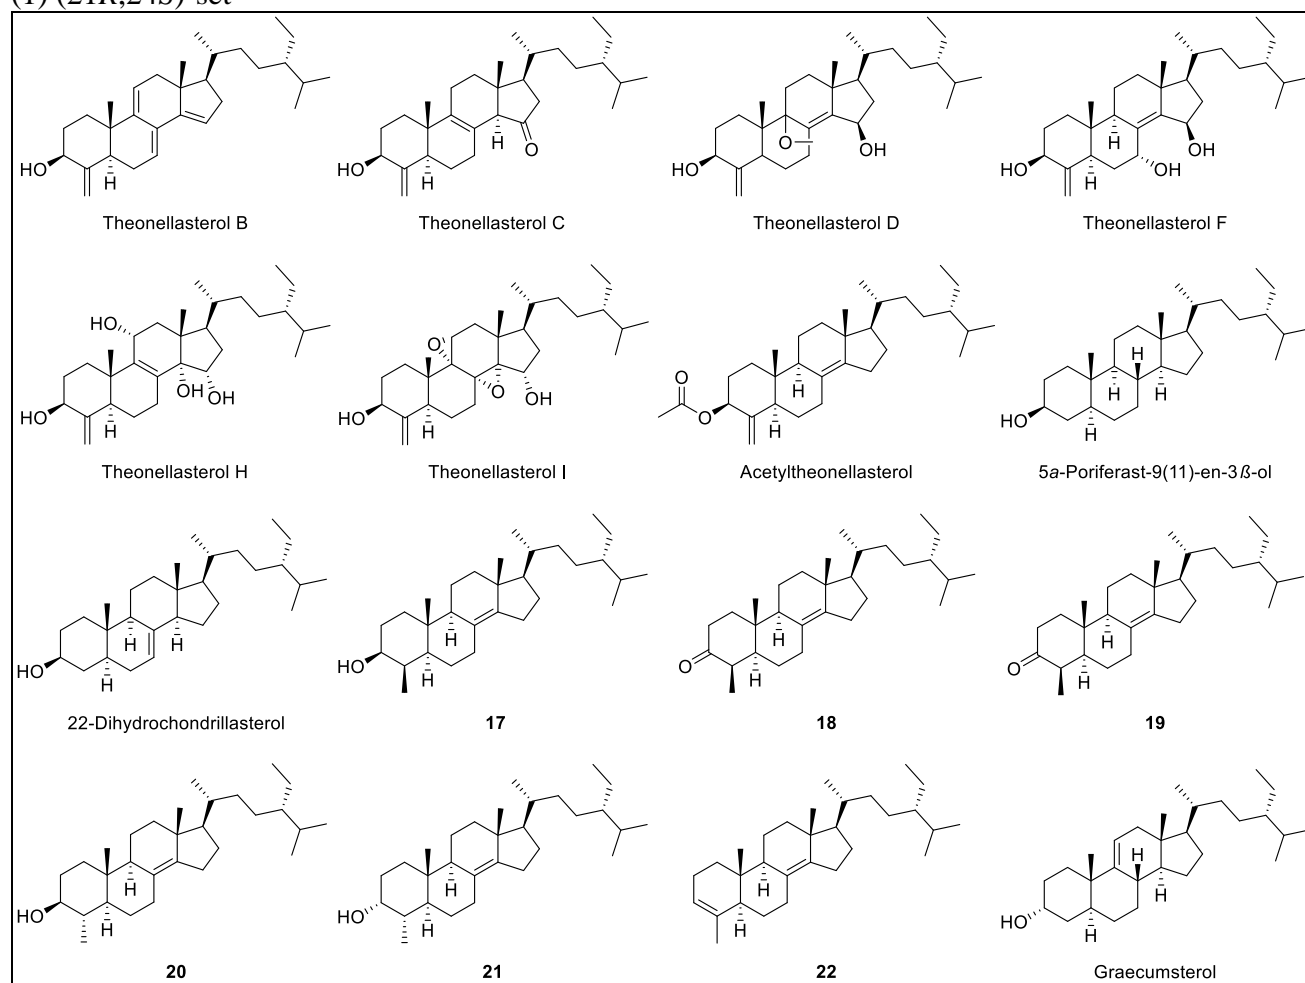

##### (2) (21*R*,24*R*)-set

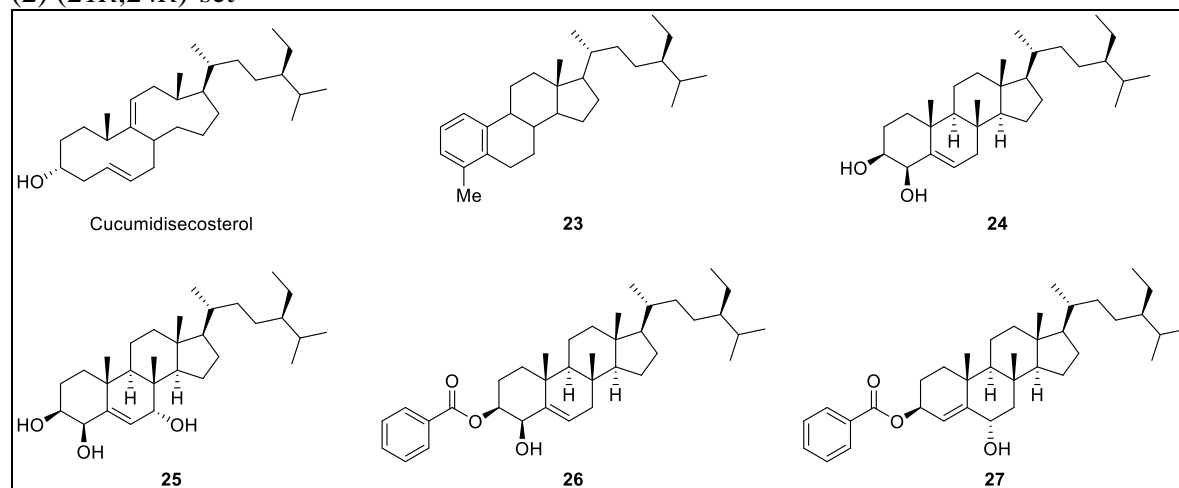

## 2. Calculation of $|\delta_{\text{H-26}}-\delta_{\text{H-27}}|$ values from the selected compounds

**Table S11.**  $|\delta_{\text{H-26}}-\delta_{\text{H-27}}|$  values for the (21*R*, 24*S*) and (21*R*, 24*R*)-sets.

| (21 <i>R</i> ,24 <i>S</i> )-group |                        |                        |                                               |                                                            |                        |                        |                                               |
|-----------------------------------|------------------------|------------------------|-----------------------------------------------|------------------------------------------------------------|------------------------|------------------------|-----------------------------------------------|
| Compound                          | $\delta_{\text{H-26}}$ | $\delta_{\text{H-27}}$ | $ \delta_{\text{H-26}}-\delta_{\text{H-27}} $ | Compound                                                   | $\delta_{\text{H-26}}$ | $\delta_{\text{H-27}}$ | $ \delta_{\text{H-26}}-\delta_{\text{H-27}} $ |
| Theonellasterol A <sup>1</sup>    | 0.90                   | 0.92                   | 0.02                                          | Acetyltheonellasterol <sup>7</sup>                         | 0.82                   | 0.83                   | 0.01                                          |
| Theonellasterol B <sup>2</sup>    | 0.90                   | 0.92                   | 0.02                                          | 5 $\alpha$ -poriferast-9(11)-en-3 $\beta$ -ol <sup>3</sup> | 0.81                   | 0.82                   | 0.01                                          |
| Theonellasterol C <sup>2</sup>    | 0.91                   | 0.93                   | 0.02                                          | 22-dihydrochondrillasterol <sup>4</sup>                    | 0.81                   | 0.83                   | 0.02                                          |
| Theonellasterol D <sup>2</sup>    | 0.90                   | 0.92                   | 0.02                                          | <b>17</b> <sup>5</sup>                                     | 0.91                   | 0.90                   | 0.01                                          |
| Theonellasterol E <sup>2</sup>    | 0.93                   | 0.94                   | 0.01                                          | <b>18</b> <sup>5</sup>                                     | 0.91                   | 0.89                   | 0.02                                          |
| Theonellasterol F <sup>2</sup>    | 0.93                   | 0.94                   | 0.01                                          | <b>19</b> <sup>5</sup>                                     | 0.91                   | 0.89                   | 0.02                                          |
| Theonellasterol G <sup>2</sup>    | 0.91                   | 0.94                   | 0.03                                          | <b>20</b> <sup>5</sup>                                     | 0.91                   | 0.90                   | 0.01                                          |
| Theonellasterol H <sup>2</sup>    | 0.91                   | 0.93                   | 0.02                                          | <b>21</b> <sup>5</sup>                                     | 0.91                   | 0.89                   | 0.02                                          |
| Theonellasterol I <sup>6</sup>    | 0.89                   | 0.91                   | 0.02                                          | <b>22</b> <sup>5</sup>                                     | 0.91                   | 0.90                   | 0.01                                          |
| Theonellasterol K <sup>7</sup>    | 0.81                   | 0.83                   | 0.02                                          | Graecumsterol <sup>8</sup>                                 | 0.83                   | 0.81                   | 0.02                                          |
| (21 <i>R</i> ,24 <i>R</i> )-group |                        |                        |                                               |                                                            |                        |                        |                                               |
| Compound                          | $\delta_{\text{H-26}}$ | $\delta_{\text{H-27}}$ | $ \delta_{\text{H-26}}-\delta_{\text{H-27}} $ | Compound                                                   | $\delta_{\text{H-26}}$ | $\delta_{\text{H-27}}$ | $ \delta_{\text{H-26}}-\delta_{\text{H-27}} $ |
| Cucumidisecosterol <sup>9</sup>   | 0.716                  | 0.666                  | 0.05                                          | <b>25</b> <sup>11</sup>                                    | 0.79                   | 0.91                   | 0.12                                          |
| <b>23</b> <sup>10</sup>           | 0.82                   | 0.86                   | 0.04                                          | <b>26</b> <sup>11</sup>                                    | 0.92                   | 0.97                   | 0.05                                          |
| <b>24</b> <sup>11</sup>           | 0.81                   | 0.86                   | 0.05                                          | <b>27</b> <sup>11</sup>                                    | 0.86                   | 0.91                   | 0.05                                          |

**Table S12.**  $|\delta_{\text{H-26}}-\delta_{\text{H-27}}|$  values for compounds **1-9**.

| Compound | $\delta_{\text{H-26}}$ | $\delta_{\text{H-27}}$ | $ \delta_{\text{H-26}}-\delta_{\text{H-27}} $ | Compound | $\delta_{\text{H-26}}$ | $\delta_{\text{H-27}}$ | $ \delta_{\text{H-26}}-\delta_{\text{H-27}} $ |
|----------|------------------------|------------------------|-----------------------------------------------|----------|------------------------|------------------------|-----------------------------------------------|
| <b>1</b> | 0.88                   | 0.90                   | 0.02                                          | <b>6</b> | 0.82                   | 0.83                   | 0.01                                          |
| <b>2</b> | 0.90                   | 0.92                   | 0.02                                          | <b>7</b> | 0.89                   | 0.92                   | 0.03                                          |
| <b>3</b> | 0.91                   | 0.92                   | 0.01                                          | <b>8</b> | 0.81                   | 0.82                   | 0.01                                          |
| <b>4</b> | 0.92                   | 0.91                   | 0.01                                          | <b>9</b> | 0.91                   | 0.92                   | 0.01                                          |
| <b>5</b> | 0.86                   | 0.88                   | 0.02                                          |          |                        |                        |                                               |

<sup>1</sup> Kho, E.; Imagawa, D. K.; Rohmer, M.; Kashman, Y.; Djerassi, C. *J. Org. Chem.* **1981**, *46*, 1836-1839.

<sup>2</sup> De Marino, S.; Ummarino, R.; D'Auria, M. V.; Chini, M. G.; Bifulco, G.; Renga, B.; D'Amore, C.; Fiorucci, S.; Debitus, C.; Zampella, A. *J. Med. Chem.* **2011**, *54*, 3065-3075.

<sup>3</sup> Das, B.; Venkateswarlu, Y.; Srinivas, K.; Rama Rao, A. *Phytochemistry*. **1992**, *31*, 1054-1055.

<sup>4</sup> Tasdemir, D.; Topaloglu, B.; Perozzo, R.; Brun, R.; O'Neill, R.; Carballeira, N. M.; Zhang, X.; Tonge, P. J.; Linden, A.; Rüedi, P. *Bioorg. Med. Chem.* **2007**, *15*, 6834-6845.

<sup>5</sup> Sepe, V.; Ummarino, R.; D'Auria, M. V.; Tagliatella-Scafati, O.; Marino, S. D.; D'Amore, C.; Renga, B.; Chini, M. G.; Bifulco, G.; Nakao, Y. *Mar. Drugs*. **2012**, *10*, 2448-2466.

<sup>6</sup> Chini, M. G.; Jones, C. R.; Zampella, A.; D'Auria, M. V.; Renga, B.; Fiorucci, S.; Butts, C. P.; Bifulco, G. *J. Org. Chem.* **2012**, *77*, 1489-1496.

<sup>7</sup> Guo, J.-K.; Chiang, C.-Y.; Lu, M.-C.; Chang, W.-B.; Su, J.-H. *Mar. Drugs*. **2012**, *10*, 1536-1544.

<sup>8</sup> Abdelkarim, A. S.; Ali, M.; Naqvi, K. J. *IOSR J. Pharm.* **2013**, *3*, 46-52.

<sup>9</sup> Al-Rehaily, A. J.; Al-Yahya, M. A.; Mirza, H. H.; Ahmed, B. *Pharm. Biol.* **2002**, *40*, 154-159.

<sup>10</sup> Stoilov, I.; Shetty, R.; St. Pyrek, J.; Smith, S. L.; Layton, W. J.; Watt, D. S.; Carlson, R. M.; Moldovan, J. M. *J. Org. Chem.* **1994**, *59*, 926-928.

<sup>11</sup> Ghosh, P.; Das, J.; Sarkar, A.; Ng, S. W.; Tieckink, E. R. *Tetrahedron*. **2012**, *68*, 6485-6491.

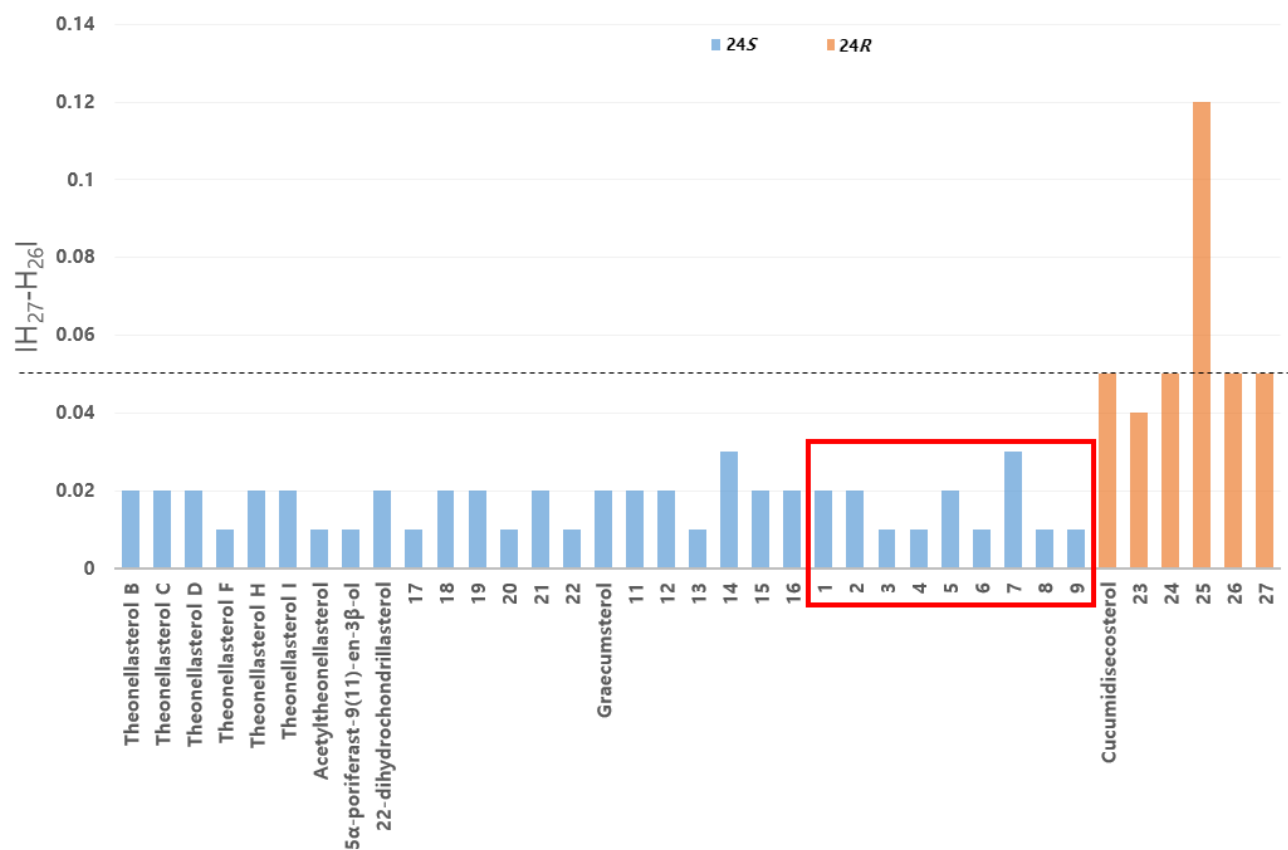

**Figure S8.** Comparison of  $|\delta_{H-26} - \delta_{H-27}|$  values for (21R,24S)-set, (21R,24R)-set, and compounds **1-9**.

## IV. X-ray crystallography data

**Table S12.** Crystal data and structure refinement for 7 $\alpha$ -theonellasterol.

|                                   |                                                |
|-----------------------------------|------------------------------------------------|
| Identification code               | 7-alpha-theonellasterol                        |
| Empirical formula                 | C <sub>30</sub> H <sub>50</sub> O <sub>2</sub> |
| Formula weight                    | 442.70                                         |
| Temperature                       | 223(2) K                                       |
| Wavelength                        | 1.54178 Å                                      |
| Crystal system                    | Monoclinic                                     |
| Space group                       | P2 <sub>1</sub>                                |
| Unit cell dimensions              | a = 7.6741(10) Å                               |
|                                   | b = 46.648(6) Å                                |
|                                   | c = 8.1389(10) Å                               |
| Volume                            | 2754.2(6) Å <sup>3</sup>                       |
| Z                                 | 4                                              |
| Density (calculated)              | 1.068 Mg/m <sup>3</sup>                        |
| Absorption coefficient            | 0.485 mm <sup>-1</sup>                         |
| F(000)                            | 984                                            |
| Crystal size                      | 0.495 x 0.035 x 0.012 mm <sup>3</sup>          |
| Theta range for data collection   | 3.790 to 77.669°                               |
| Index ranges                      | -9 ≤ h ≤ 9, -57 ≤ k ≤ 58, -9 ≤ l ≤ 10          |
| Reflections collected             | 48446                                          |
| Independent reflections           | 11015 [R(int) = 0.1461]                        |
| Completeness to theta = 67.679°   | 99.0 %                                         |
| Absorption correction             | Semi-empirical from equivalents                |
| Max. and min. transmission        | 0.7541 and 0.6016                              |
| Refinement method                 | Full-matrix least-squares on F <sup>2</sup>    |
| Data / restraints / parameters    | 11015 / 1 / 593                                |
| Goodness-of-fit on F <sup>2</sup> | 1.053                                          |
| Final R indices [I > 2σ(I)]       | R1 = 0.0886, wR2 = 0.2369                      |
| R indices (all data)              | R1 = 0.1567, wR2 = 0.2980                      |
| Absolute structure parameter      | -0.1(3)                                        |
| Extinction coefficient            | n/a                                            |
| Largest diff. peak and hole       | 0.221 and -0.222 e.Å <sup>-3</sup>             |

**Table S13.** Atomic coordinates ( $\times 10^4$ ) and equivalent isotropic displacement parameters ( $\text{\AA}^2 \times 10^3$ ) for 7 $\alpha$ -theonellasterol.

|       | x         | y       | z         | U (eq) |       | x         | y       | z         | U (eq)  |
|-------|-----------|---------|-----------|--------|-------|-----------|---------|-----------|---------|
| C(1)  | 6328(9)   | 4329(2) | 12497(9)  | 94(3)  | C(31) | -4381(9)  | 5700(2) | 4684(8)   | 92(3)   |
| C(2)  | 8312(10)  | 4436(3) | 12840(10) | 102(3) | C(32) | -4496(12) | 5634(3) | 2800(9)   | 122(4)  |
| C(3)  | 9277(10)  | 4532(3) | 14711(11) | 110(3) | C(33) | -6398(12) | 5536(3) | 1658(9)   | 121(4)  |
| C(4)  | 8192(10)  | 4751(3) | 15292(9)  | 104(3) | C(34) | -6989(11) | 5278(3) | 2471(10)  | 108(3)  |
| C(5)  | 6253(10)  | 4652(2) | 15009(8)  | 92(2)  | C(35) | -6962(10) | 5347(2) | 4302(9)   | 95(2)   |
| C(6)  | 5253(9)   | 4562(2) | 13117(8)  | 87(2)  | C(36) | -5054(10) | 5437(2) | 5461(8)   | 90(2)   |
| C(7)  | 3233(10)  | 4479(2) | 12752(9)  | 99(3)  | C(37) | -4908(10) | 5482(2) | 7372(8)   | 89(2)   |
| C(8)  | 2270(10)  | 4424(3) | 10800(10) | 101(3) | C(38) | -2929(9)  | 5548(2) | 8496(8)   | 90(3)   |
| O(1)  | 9139(7)   | 4829(2) | 17083(6)  | 121(2) | C(39) | -2109(10) | 5792(2) | 7756(8)   | 87(2)   |
| C(9)  | 3315(9)   | 4205(2) | 10087(10) | 92(2)  | C(40) | -2314(10) | 5746(2) | 5813(8)   | 95(3)   |
| O(2)  | 2167(7)   | 4697(2) | 9932(6)   | 106(2) | C(41) | -1347(13) | 5983(3) | 5117(11)  | 126(4)  |
| C(10) | 5353(10)  | 4285(2) | 10506(9)  | 93(2)  | C(42) | 320(12)   | 6113(3) | 6497(11)  | 119(4)  |
| C(11) | 6367(11)  | 4074(2) | 9697(12)  | 111(3) | C(43) | -291(11)  | 6244(2) | 7950(11)  | 106(3)  |
| C(12) | 5123(12)  | 3926(2) | 8030(13)  | 107(3) | C(44) | -1265(10) | 6016(2) | 8648(10)  | 91(2)   |
| C(13) | 3508(11)  | 3769(2) | 8336(13)  | 106(3) | C(45) | -950(11)  | 6073(2) | 10593(9)  | 99(3)   |
| C(14) | 2550(11)  | 3976(2) | 9194(11)  | 95(2)  | C(46) | 462(12)   | 6315(2) | 11068(11) | 106(3)  |
| C(15) | 502(11)   | 3898(3) | 8660(12)  | 109(3) | C(47) | 1378(11)  | 6319(2) | 9665(11)  | 104(3)  |
| C(16) | 225(12)   | 3670(2) | 7272(15)  | 116(3) | C(48) | -5519(12) | 5968(3) | 4746(11)  | 112(3)  |
| C(17) | 1912(12)  | 3687(2) | 6655(13)  | 107(3) | O(3)  | -8764(7)  | 5174(2) | 1378(7)   | 118(2)  |
| C(18) | 6364(13)  | 4046(2) | 13499(13) | 115(3) | C(49) | -8443(11) | 5325(3) | 4775(12)  | 115(3)  |
| C(19) | 5470(11)  | 4648(3) | 16236(9)  | 112(3) | O(4)  | -1861(8)  | 5294(2) | 8645(6)   | 105(2)  |
| C(20) | 4183(15)  | 3505(3) | 9540(18)  | 143(4) | C(50) | -1491(14) | 6513(3) | 7371(15)  | 134(4)  |
| C(21) | 2120(14)  | 3415(3) | 5604(17)  | 125(3) | C(51) | 2496(14)  | 6591(3) | 9662(15)  | 131(4)  |
| C(22) | 356(16)   | 3361(2) | 4126(18)  | 135(4) | C(52) | 3879(15)  | 6660(2) | 11434(16) | 130(4)  |
| C(23) | 354(15)   | 3070(2) | 3133(19)  | 143(4) | C(53) | 4924(18)  | 6944(3) | 11590(20) | 162(6)  |
| C(24) | -1623(17) | 2986(3) | 2040(20)  | 147(5) | C(54) | 6016(14)  | 7028(2) | 13469(18) | 134(4)  |
| C(25) | -2647(18) | 2858(3) | 3250(20)  | 175(6) | C(55) | 4630(30)  | 7138(5) | 14290(30) | 209(10) |
| C(26) | -4720(20) | 2835(4) | 2290(30)  | 219(9) | C(56) | 5270(40)  | 7158(5) | 16150(50) | 292(17) |
| C(27) | 3820(20)  | 3425(4) | 5030(20)  | 183(7) | C(57) | 3500(30)  | 6575(5) | 8290(20)  | 228(10) |
| C(28) | -1615(16) | 2783(3) | 530(20)   | 146(5) | C(58) | 7625(17)  | 7230(3) | 13620(20) | 165(6)  |



**Table S14.** Bond lengths [ $\text{\AA}$ ] and angles [ $^\circ$ ] for 7 $\alpha$ -theonellasterol.

|                  |           |                  |           |                     |           |                     |           |                     |           |
|------------------|-----------|------------------|-----------|---------------------|-----------|---------------------|-----------|---------------------|-----------|
| C(1)-C(2)        | 1.539(10) | C(13)-C(14)      | 1.516(13) | C(26)-H(26A)        | 0.9700    | C(38)-O(4)          | 1.425(11) | C(51)-C(52)         | 1.520(16) |
| C(1)-C(18)       | 1.547(14) | C(13)-C(20)      | 1.553(16) | C(26)-H(26B)        | 0.9700    | C(38)-C(39)         | 1.516(12) | C(51)-C(57)         | 1.55(2)   |
| C(1)-C(6)        | 1.547(11) | C(13)-C(17)      | 1.557(13) | C(26)-H(26C)        | 0.9700    | C(38)-H(38)         | 0.9900    | C(51)-H(51)         | 0.9900    |
| C(1)-C(10)       | 1.561(10) | C(14)-C(15)      | 1.532(11) | C(27)-H(27A)        | 0.9700    | C(39)-C(44)         | 1.316(13) | C(52)-C(53)         | 1.532(16) |
| C(2)-C(3)        | 1.528(11) | C(15)-C(16)      | 1.517(15) | C(27)-H(27B)        | 0.9700    | C(39)-C(40)         | 1.552(9)  | C(52)-H(52A)        | 0.9800    |
| C(2)-H(2A)       | 0.9800    | C(15)-H(15A)     | 0.9800    | C(27)-H(27C)        | 0.9700    | C(40)-C(41)         | 1.539(14) | C(52)-H(52B)        | 0.9800    |
| C(2)-H(2B)       | 0.9800    | C(15)-H(15B)     | 0.9800    | C(28)-C(29)         | 1.52(2)   | C(40)-H(40)         | 0.9900    | C(53)-C(54)         | 1.536(18) |
| C(3)-C(4)        | 1.490(12) | C(16)-C(17)      | 1.536(13) | C(28)-C(30)         | 1.555(18) | C(41)-C(42)         | 1.526(14) | C(53)-H(53A)        | 0.9800    |
| C(3)-H(3A)       | 0.9800    | C(16)-H(16A)     | 0.9800    | C(28)-H(28)         | 0.9900    | C(41)-H(41A)        | 0.9800    | C(53)-H(53B)        | 0.9800    |
| C(3)-H(3B)       | 0.9800    | C(16)-H(16B)     | 0.9800    | C(29)-H(29A)        | 0.9700    | C(41)-H(41B)        | 0.9800    | C(54)-C(55)         | 1.52(2)   |
| C(4)-O(1)        | 1.447(9)  | C(17)-C(21)      | 1.566(15) | C(29)-H(29B)        | 0.9700    | C(42)-C(43)         | 1.535(13) | C(54)-C(58)         | 1.525(16) |
| C(4)-C(5)        | 1.502(11) | C(17)-H(17)      | 0.9900    | C(29)-H(29C)        | 0.9700    | C(42)-H(42A)        | 0.9800    | C(54)-H(54)         | 0.9900    |
| C(4)-H(4)        | 0.9900    | C(18)-H(18A)     | 0.9700    | C(30)-H(30A)        | 0.9700    | C(42)-H(42B)        | 0.9800    | C(55)-C(56)         | 1.43(3)   |
| C(5)-C(19)       | 1.323(9)  | C(18)-H(18B)     | 0.9700    | C(30)-H(30B)        | 0.9700    | C(43)-C(44)         | 1.514(13) | C(55)-H(55A)        | 0.9800    |
| C(5)-C(6)        | 1.537(10) | C(18)-H(18C)     | 0.9700    | C(30)-H(30C)        | 0.9700    | C(43)-C(50)         | 1.536(15) | C(55)-H(55B)        | 0.9800    |
| C(6)-C(7)        | 1.530(10) | C(19)-H(19A)     | 0.9400    | C(31)-C(48)         | 1.536(14) | C(43)-C(47)         | 1.595(13) | C(56)-H(56A)        | 0.9700    |
| C(6)-H(6)        | 0.9900    | C(19)-H(19B)     | 0.9400    | C(31)-C(32)         | 1.538(10) | C(44)-C(45)         | 1.545(11) | C(56)-H(56B)        | 0.9700    |
| C(7)-C(8)        | 1.539(11) | C(20)-H(20A)     | 0.9700    | C(31)-C(36)         | 1.544(13) | C(45)-C(46)         | 1.525(14) | C(56)-H(56C)        | 0.9700    |
| C(7)-H(7A)       | 0.9800    | C(20)-H(20B)     | 0.9700    | C(31)-C(40)         | 1.567(10) | C(45)-H(45A)        | 0.9800    | C(57)-H(57A)        | 0.9700    |
| C(7)-H(7B)       | 0.9800    | C(20)-H(20C)     | 0.9700    | C(32)-C(33)         | 1.524(13) | C(45)-H(45B)        | 0.9800    | C(57)-H(57B)        | 0.9700    |
| C(8)-O(2)        | 1.447(12) | C(21)-C(22)      | 1.511(16) | C(32)-H(32A)        | 0.9800    | C(46)-C(47)         | 1.524(13) | C(57)-H(57C)        | 0.9700    |
| C(8)-C(9)        | 1.526(13) | C(21)-C(27)      | 1.523(16) | C(32)-H(32B)        | 0.9800    | C(46)-H(46A)        | 0.9800    | C(58)-C(59)         | 1.48(2)   |
| C(8)-H(8)        | 0.9900    | C(21)-H(21)      | 0.9900    | C(33)-C(34)         | 1.512(16) | C(46)-H(46B)        | 0.9800    | C(58)-C(60)         | 1.54(2)   |
| O(1)-H(1)        | 0.8300    | C(22)-C(23)      | 1.576(16) | C(33)-H(33A)        | 0.9800    | C(47)-C(51)         | 1.531(15) | C(58)-H(58)         | 0.9900    |
| C(9)-C(14)       | 1.314(13) | C(22)-H(22A)     | 0.9800    | C(33)-H(33B)        | 0.9800    | C(47)-H(47)         | 0.9900    | C(59)-H(59A)        | 0.9700    |
| C(9)-C(10)       | 1.535(10) | C(22)-H(22B)     | 0.9800    | C(34)-O(3)          | 1.446(10) | C(48)-H(48A)        | 0.9700    | C(59)-H(59B)        | 0.9700    |
| O(2)-H(2)        | 0.8300    | C(23)-C(24)      | 1.538(15) | C(34)-C(35)         | 1.518(10) | C(48)-H(48B)        | 0.9700    | C(59)-H(59C)        | 0.9700    |
| C(10)-C(11)      | 1.530(12) | C(23)-H(23A)     | 0.9800    | C(34)-H(34)         | 0.9900    | C(48)-H(48C)        | 0.9700    | C(60)-H(60A)        | 0.9700    |
| C(10)-H(10)      | 0.9900    | C(23)-H(23B)     | 0.9800    | C(35)-C(49)         | 1.317(11) | O(3)-H(3)           | 0.8300    | C(60)-H(60B)        | 0.9700    |
| C(11)-C(12)      | 1.544(12) | C(24)-C(28)      | 1.555(19) | C(35)-C(36)         | 1.520(11) | C(49)-H(49A)        | 0.9400    | C(60)-H(60C)        | 0.9700    |
| C(11)-H(11A)     | 0.9800    | C(24)-C(25)      | 1.56(2)   | C(36)-C(37)         | 1.537(9)  | C(49)-H(49B)        | 0.9400    | C(2)-C(1)-C(18)     | 109.5(7)  |
| C(11)-H(11B)     | 0.9800    | C(24)-H(24)      | 0.9900    | C(36)-H(36)         | 0.9900    | O(4)-H(4A)          | 0.8300    | C(2)-C(1)-C(6)      | 108.3(8)  |
| C(6)-C(1)-C(10)  | 107.8(6)  | O(2)-C(8)-C(7)   | 106.8(8)  | C(9)-C(14)-C(15)    | 125.5(8)  | C(22)-C(21)-C(27)   | 113.4(12) | H(26B)-C(26)-H(26C) | 109.5     |
| C(3)-C(2)-C(1)   | 113.9(6)  | C(9)-C(8)-C(7)   | 111.7(7)  | C(13)-C(14)-C(15)   | 108.9(8)  | C(22)-C(21)-C(17)   | 110.3(9)  | C(21)-C(27)-H(27A)  | 109.5     |
| C(3)-C(2)-H(2A)  | 108.8     | O(2)-C(8)-H(8)   | 109.2     | C(16)-C(15)-C(14)   | 105.1(7)  | C(27)-C(21)-C(17)   | 113.1(9)  | C(21)-C(27)-H(27B)  | 109.5     |
| C(1)-C(2)-H(2A)  | 108.8     | C(9)-C(8)-H(8)   | 109.2     | C(16)-C(15)-H(15A)  | 110.7     | C(22)-C(21)-H(21)   | 106.5     | H(27A)-C(27)-H(27B) | 109.5     |
| C(3)-C(2)-H(2B)  | 108.8     | C(7)-C(8)-H(8)   | 109.2     | C(14)-C(15)-H(15A)  | 110.7     | C(27)-C(21)-H(21)   | 106.5     | C(21)-C(27)-H(27C)  | 109.5     |
| C(1)-C(2)-H(2B)  | 108.8     | C(4)-O(1)-H(1)   | 109.5     | C(16)-C(15)-H(15B)  | 110.7     | C(17)-C(21)-H(21)   | 106.5     | H(27A)-C(27)-H(27C) | 109.5     |
| H(2A)-C(2)-H(2B) | 107.7     | C(14)-C(9)-C(8)  | 123.9(7)  | C(14)-C(15)-H(15B)  | 110.7     | C(21)-C(22)-C(23)   | 113.8(10) | H(27B)-C(27)-H(27C) | 109.5     |
| C(4)-C(3)-C(2)   | 112.3(7)  | C(14)-C(9)-C(10) | 124.0(7)  | H(15A)-C(15)-H(15B) | 108.8     | C(21)-C(22)-H(22A)  | 108.8     | C(29)-C(28)-C(30)   | 110.3(14) |
| C(4)-C(3)-H(3A)  | 109.1     | C(8)-C(9)-C(10)  | 112.1(8)  | C(15)-C(16)-C(17)   | 106.2(8)  | C(23)-C(22)-H(22A)  | 108.8     | C(29)-C(28)-C(24)   | 114.3(11) |
| C(2)-C(3)-H(3A)  | 109.1     | C(8)-O(2)-H(2)   | 109.5     | C(15)-C(16)-H(16A)  | 110.5     | C(21)-C(22)-H(22B)  | 108.8     | C(30)-C(28)-C(24)   | 114.6(13) |
| C(4)-C(3)-H(3B)  | 109.1     | C(11)-C(10)-C(9) | 111.8(7)  | C(17)-C(16)-H(16A)  | 110.5     | C(23)-C(22)-H(22B)  | 108.8     | C(29)-C(28)-H(28)   | 105.6     |
| C(2)-C(3)-H(3B)  | 109.1     | C(11)-C(10)-C(1) | 113.1(7)  | C(15)-C(16)-H(16B)  | 110.5     | H(22A)-C(22)-H(22B) | 107.7     | C(30)-C(28)-H(28)   | 105.6     |

|                     |          |                     |          |                     |          |                     |           |                     |          |
|---------------------|----------|---------------------|----------|---------------------|----------|---------------------|-----------|---------------------|----------|
| H(3A)-C(3)-H(3B)    | 107.9    | C(9)-C(10)-C(1)     | 111.8(5) | C(17)-C(16)-H(16B)  | 110.5    | C(24)-C(23)-C(22)   | 110.6(9)  | C(24)-C(28)-H(28)   | 105.6    |
| O(1)-C(4)-C(3)      | 110.0(6) | C(11)-C(10)-H(10)   | 106.5    | H(16A)-C(16)-H(16B) | 108.7    | C(24)-C(23)-H(23A)  | 109.5     | C(28)-C(29)-H(29A)  | 109.5    |
| O(1)-C(4)-C(5)      | 112.2(6) | C(9)-C(10)-H(10)    | 106.5    | C(16)-C(17)-C(13)   | 103.3(8) | C(22)-C(23)-H(23A)  | 109.5     | C(28)-C(29)-H(29B)  | 109.5    |
| C(3)-C(4)-C(5)      | 111.6(9) | C(1)-C(10)-H(10)    | 106.5    | C(16)-C(17)-C(21)   | 112.5(8) | C(24)-C(23)-H(23B)  | 109.5     | H(29A)-C(29)-H(29B) | 109.5    |
| O(1)-C(4)-H(4)      | 107.6    | C(10)-C(11)-C(12)   | 114.3(7) | C(13)-C(17)-C(21)   | 119.2(8) | C(22)-C(23)-H(23B)  | 109.5     | C(28)-C(29)-H(29C)  | 109.5    |
| C(3)-C(4)-H(4)      | 107.6    | C(10)-C(11)-H(11A)  | 108.7    | C(16)-C(17)-H(17)   | 107.0    | H(23A)-C(23)-H(23B) | 108.1     | H(29A)-C(29)-H(29C) | 109.5    |
| C(5)-C(4)-H(4)      | 107.6    | C(12)-C(11)-H(11A)  | 108.7    | C(13)-C(17)-H(17)   | 107.0    | C(23)-C(24)-C(28)   | 110.8(10) | H(29B)-C(29)-H(29C) | 109.5    |
| C(19)-C(5)-C(4)     | 124.1(7) | C(10)-C(11)-H(11B)  | 108.7    | C(21)-C(17)-H(17)   | 107.0    | C(23)-C(24)-C(25)   | 109.9(12) | C(28)-C(30)-H(30A)  | 109.5    |
| C(19)-C(5)-C(6)     | 123.4(7) | C(12)-C(11)-H(11B)  | 108.7    | C(1)-C(18)-H(18A)   | 109.5    | C(28)-C(24)-C(25)   | 113.4(11) | C(28)-C(30)-H(30B)  | 109.5    |
| C(4)-C(5)-C(6)      | 112.6(5) | H(11A)-C(11)-H(11B) | 107.6    | C(1)-C(18)-H(18B)   | 109.5    | C(23)-C(24)-H(24)   | 107.5     | H(30A)-C(30)-H(30B) | 109.5    |
| C(7)-C(6)-C(5)      | 114.0(5) | C(13)-C(12)-C(11)   | 111.9(7) | H(18A)-C(18)-H(18B) | 109.5    | C(28)-C(24)-H(24)   | 107.5     | C(28)-C(30)-H(30C)  | 109.5    |
| C(7)-C(6)-C(1)      | 111.8(7) | C(13)-C(12)-H(12A)  | 109.2    | C(1)-C(18)-H(18C)   | 109.5    | C(25)-C(24)-H(24)   | 107.5     | H(30A)-C(30)-H(30C) | 109.5    |
| C(5)-C(6)-C(1)      | 111.9(6) | C(11)-C(12)-H(12A)  | 109.2    | H(18A)-C(18)-H(18C) | 109.5    | C(26)-C(25)-C(24)   | 111.1(14) | H(30B)-C(30)-H(30C) | 109.5    |
| C(7)-C(6)-H(6)      | 106.2    | C(13)-C(12)-H(12B)  | 109.2    | H(18B)-C(18)-H(18C) | 109.5    | C(26)-C(25)-H(25A)  | 109.4     | C(48)-C(31)-C(32)   | 110.3(7) |
| C(6)-C(1)-C(10)     | 107.8(6) | O(2)-C(8)-C(7)      | 106.8(8) | C(9)-C(14)-C(15)    | 125.5(8) | C(22)-C(21)-C(27)   | 113.4(12) | H(26B)-C(26)-H(26C) | 109.5    |
| C(3)-C(2)-C(1)      | 113.9(6) | C(9)-C(8)-C(7)      | 111.7(7) | C(13)-C(14)-C(15)   | 108.9(8) | C(22)-C(21)-C(17)   | 110.3(9)  | C(21)-C(27)-H(27A)  | 109.5    |
| C(3)-C(2)-H(2A)     | 108.8    | O(2)-C(8)-H(8)      | 109.2    | C(16)-C(15)-C(14)   | 105.1(7) | C(27)-C(21)-C(17)   | 113.1(9)  | C(21)-C(27)-H(27B)  | 109.5    |
| C(1)-C(2)-H(2A)     | 108.8    | C(9)-C(8)-H(8)      | 109.2    | C(16)-C(15)-H(15A)  | 110.7    | C(22)-C(21)-H(21)   | 106.5     | H(27A)-C(27)-H(27B) | 109.5    |
| C(3)-C(2)-H(2B)     | 108.8    | C(7)-C(8)-H(8)      | 109.2    | C(14)-C(15)-H(15A)  | 110.7    | C(27)-C(21)-H(21)   | 106.5     | C(21)-C(27)-H(27C)  | 109.5    |
| C(1)-C(2)-H(2B)     | 108.8    | C(4)-O(1)-H(1)      | 109.5    | C(16)-C(15)-H(15B)  | 110.7    | C(17)-C(21)-H(21)   | 106.5     | H(27A)-C(27)-H(27C) | 109.5    |
| C(5)-C(6)-H(6)      | 106.2    | C(11)-C(12)-H(12B)  | 109.2    | C(5)-C(19)-H(19A)   | 120.0    | C(24)-C(25)-H(25A)  | 109.4     | C(48)-C(31)-C(36)   | 111.3(6) |
| C(1)-C(6)-H(6)      | 106.2    | H(12A)-C(12)-H(12B) | 107.9    | C(5)-C(19)-H(19B)   | 120.0    | C(26)-C(25)-H(25B)  | 109.4     | C(32)-C(31)-C(36)   | 109.4(8) |
| C(6)-C(7)-C(8)      | 111.0(5) | C(14)-C(13)-C(12)   | 108.2(8) | H(19A)-C(19)-H(19B) | 120.0    | C(24)-C(25)-H(25B)  | 109.4     | C(48)-C(31)-C(40)   | 110.3(8) |
| C(6)-C(7)-H(7A)     | 109.4    | C(14)-C(13)-C(20)   | 109.0(8) | C(13)-C(20)-H(20A)  | 109.5    | H(25A)-C(25)-H(25B) | 108.0     | C(32)-C(31)-C(40)   | 109.3(5) |
| C(8)-C(7)-H(7A)     | 109.4    | C(12)-C(13)-C(20)   | 111.1(9) | C(13)-C(20)-H(20B)  | 109.5    | C(25)-C(26)-H(26A)  | 109.5     | C(36)-C(31)-C(40)   | 106.2(6) |
| C(6)-C(7)-H(7B)     | 109.4    | C(14)-C(13)-C(17)   | 101.6(7) | H(20A)-C(20)-H(20B) | 109.5    | C(25)-C(26)-H(26B)  | 109.5     | C(33)-C(32)-C(31)   | 113.6(6) |
| C(8)-C(7)-H(7B)     | 109.4    | C(12)-C(13)-C(17)   | 115.0(8) | C(13)-C(20)-H(20C)  | 109.5    | H(26A)-C(26)-H(26B) | 109.5     | C(33)-C(32)-H(32A)  | 108.8    |
| H(7A)-C(7)-H(7B)    | 108.0    | C(20)-C(13)-C(17)   | 111.4(9) | H(20A)-C(20)-H(20C) | 109.5    | C(25)-C(26)-H(26C)  | 109.5     | C(31)-C(32)-H(32A)  | 108.8    |
| O(2)-C(8)-C(9)      | 110.9(6) | C(9)-C(14)-C(13)    | 125.1(7) | H(20B)-C(20)-H(20C) | 109.5    | H(26A)-C(26)-H(26C) | 109.5     | C(33)-C(32)-H(32B)  | 108.8    |
| C(31)-C(32)-H(32B)  | 108.8    | C(42)-C(41)-H(41A)  | 108.8    | C(46)-C(47)-H(47)   | 107.2    | H(53A)-C(53)-H(53B) | 107.7     | H(26B)-C(26)-H(26C) | 109.5    |
| H(32A)-C(32)-H(32B) | 107.7    | C(40)-C(41)-H(41A)  | 108.8    | C(51)-C(47)-H(47)   | 107.2    | C(55)-C(54)-C(58)   | 114.9(13) | C(21)-C(27)-H(27A)  | 109.5    |
| C(34)-C(33)-C(32)   | 109.7(7) | C(42)-C(41)-H(41B)  | 108.8    | C(43)-C(47)-H(47)   | 107.2    | C(55)-C(54)-C(53)   | 106.8(12) | C(21)-C(27)-H(27B)  | 109.5    |
| C(34)-C(33)-H(33A)  | 109.7    | C(40)-C(41)-H(41B)  | 108.8    | C(31)-C(48)-H(48A)  | 109.5    | C(58)-C(54)-C(53)   | 113.8(12) | H(27A)-C(27)-H(27B) | 109.5    |
| C(32)-C(33)-H(33A)  | 109.7    | H(41A)-C(41)-H(41B) | 107.7    | C(31)-C(48)-H(48B)  | 109.5    | C(55)-C(54)-H(54)   | 107.0     | C(21)-C(27)-H(27C)  | 109.5    |
| C(34)-C(33)-H(33B)  | 109.7    | C(41)-C(42)-C(43)   | 109.4(7) | H(48A)-C(48)-H(48B) | 109.5    | C(58)-C(54)-H(54)   | 107.0     | H(27A)-C(27)-H(27C) | 109.5    |
| C(32)-C(33)-H(33B)  | 109.7    | C(41)-C(42)-H(42A)  | 109.8    | C(31)-C(48)-H(48C)  | 109.5    | C(53)-C(54)-H(54)   | 107.0     | H(27B)-C(27)-H(27C) | 109.5    |

|                     |          |                     |          |                     |           |                     |           |                     |           |
|---------------------|----------|---------------------|----------|---------------------|-----------|---------------------|-----------|---------------------|-----------|
| H(33A)-C(33)-H(33B) | 108.2    | C(43)-C(42)-H(42A)  | 109.8    | H(48A)-C(48)-H(48C) | 109.5     | C(56)-C(55)-C(54)   | 116.0(19) | C(29)-C(28)-C(30)   | 110.3(14) |
| O(3)-C(34)-C(33)    | 110.8(7) | C(41)-C(42)-H(42B)  | 109.8    | H(48B)-C(48)-H(48C) | 109.5     | C(56)-C(55)-H(55A)  | 108.3     | C(29)-C(28)-C(24)   | 114.3(11) |
| O(3)-C(34)-C(35)    | 112.6(7) | C(43)-C(42)-H(42B)  | 109.8    | C(34)-O(3)-H(3)     | 109.5     | C(54)-C(55)-H(55A)  | 108.3     | C(30)-C(28)-C(24)   | 114.6(13) |
| C(35)-C(36)-H(36)   | 106.5    | H(42A)-C(42)-H(42B) | 108.2    | C(35)-C(49)-H(49A)  | 120.0     | C(56)-C(55)-H(55B)  | 108.3     | C(29)-C(28)-H(28)   | 105.6     |
| C(37)-C(36)-H(36)   | 106.5    | C(44)-C(43)-C(42)   | 108.7(9) | C(35)-C(49)-H(49B)  | 120.0     | C(54)-C(55)-H(55B)  | 108.3     | H(59A)-C(59)-H(59C) | 109.5     |
| C(31)-C(36)-H(36)   | 106.5    | C(44)-C(43)-C(50)   | 111.7(7) | H(49A)-C(49)-H(49B) | 120.0     | H(55A)-C(55)-H(55B) | 107.4     | H(59B)-C(59)-H(59C) | 109.5     |
| C(38)-C(37)-C(36)   | 111.3(5) | C(42)-C(43)-C(50)   | 113.1(8) | C(38)-O(4)-H(4A)    | 109.5     | C(55)-C(56)-H(56A)  | 109.5     | C(58)-C(60)-H(60A)  | 109.5     |
| C(38)-C(37)-H(37A)  | 109.4    | C(44)-C(43)-C(47)   | 100.3(7) | C(43)-C(50)-H(50A)  | 109.5     | C(55)-C(56)-H(56B)  | 109.5     | C(58)-C(60)-H(60B)  | 109.5     |
| C(36)-C(37)-H(37A)  | 109.4    | C(42)-C(43)-C(47)   | 113.7(7) | C(43)-C(50)-H(50B)  | 109.5     | H(56A)-C(56)-H(56B) | 109.5     | H(60A)-C(60)-H(60B) | 109.5     |
| C(38)-C(37)-H(37B)  | 109.4    | C(50)-C(43)-C(47)   | 108.6(9) | H(50A)-C(50)-H(50B) | 109.5     | C(55)-C(56)-H(56C)  | 109.5     | C(58)-C(60)-H(60C)  | 109.5     |
| C(36)-C(37)-H(37B)  | 109.4    | C(39)-C(44)-C(43)   | 124.4(7) | C(43)-C(50)-H(50C)  | 109.5     | H(56A)-C(56)-H(56C) | 109.5     | H(60A)-C(60)-H(60C) | 109.5     |
| C(3)-C(2)-C(1)      | 113.9(6) | C(9)-C(8)-C(7)      | 111.7(7) | C(13)-C(14)-C(15)   | 108.9(8)  | C(22)-C(21)-C(17)   | 110.3(9)  | C(21)-C(27)-H(27A)  | 109.5     |
| C(3)-C(2)-H(2A)     | 108.8    | O(2)-C(8)-H(8)      | 109.2    | C(16)-C(15)-C(14)   | 105.1(7)  | C(27)-C(21)-C(17)   | 113.1(9)  | C(21)-C(27)-H(27B)  | 109.5     |
| C(1)-C(2)-H(2A)     | 108.8    | C(9)-C(8)-H(8)      | 109.2    | C(16)-C(15)-H(15A)  | 110.7     | C(22)-C(21)-H(21)   | 106.5     | H(27A)-C(27)-H(27B) | 109.5     |
| C(3)-C(2)-H(2B)     | 108.8    | C(7)-C(8)-H(8)      | 109.2    | C(14)-C(15)-H(15A)  | 110.7     | C(27)-C(21)-H(21)   | 106.5     | C(21)-C(27)-H(27C)  | 109.5     |
| C(1)-C(2)-H(2B)     | 108.8    | C(4)-O(1)-H(1)      | 109.5    | C(16)-C(15)-H(15B)  | 110.7     | C(17)-C(21)-H(21)   | 106.5     | H(27A)-C(27)-H(27C) | 109.5     |
| H(37A)-C(37)-H(37B) | 108.0    | C(39)-C(44)-C(45)   | 125.9(8) | H(50A)-C(50)-H(50C) | 109.5     | H(56B)-C(56)-H(56C) | 109.5     | H(60B)-C(60)-H(60C) | 109.5     |
| O(4)-C(38)-C(39)    | 110.9(6) | C(43)-C(44)-C(45)   | 109.4(8) | H(50B)-C(50)-H(50C) | 109.5     | C(51)-C(57)-H(57A)  | 109.5     | C(58)-C(60)-H(60B)  | 109.5     |
| O(4)-C(38)-C(37)    | 108.3(7) | C(46)-C(45)-C(44)   | 104.4(7) | C(52)-C(51)-C(47)   | 113.1(9)  | C(51)-C(57)-H(57B)  | 109.5     | H(60A)-C(60)-H(60B) | 109.5     |
| C(39)-C(38)-C(37)   | 112.0(6) | C(46)-C(45)-H(45A)  | 110.9    | C(52)-C(51)-C(57)   | 109.7(11) | H(57A)-C(57)-H(57B) | 109.5     | C(58)-C(60)-H(60C)  | 109.5     |
| O(4)-C(38)-H(38)    | 108.5    | C(44)-C(45)-H(45A)  | 110.9    | C(47)-C(51)-C(57)   | 111.8(12) | C(51)-C(57)-H(57C)  | 109.5     | H(60A)-C(60)-H(60C) | 109.5     |
| C(39)-C(38)-H(38)   | 108.5    | C(46)-C(45)-H(45B)  | 110.9    | C(52)-C(51)-H(51)   | 107.3     | H(57A)-C(57)-H(57C) | 109.5     | H(60B)-C(60)-H(60C) | 109.5     |
| C(37)-C(38)-H(38)   | 108.5    | C(44)-C(45)-H(45B)  | 110.9    | C(47)-C(51)-H(51)   | 107.3     | H(57B)-C(57)-H(57C) | 109.5     | H(59A)-C(59)-H(59C) | 109.5     |
| C(44)-C(39)-C(38)   | 124.7(6) | H(45A)-C(45)-H(45B) | 108.9    | C(57)-C(51)-H(51)   | 107.3     | C(59)-C(58)-C(54)   | 113.2(13) | C(48)-C(31)-C(40)   | 110.3(8)  |
| C(44)-C(39)-C(40)   | 122.7(7) | C(47)-C(46)-C(45)   | 106.4(8) | C(51)-C(52)-C(53)   | 116.5(11) | C(59)-C(58)-C(60)   | 109.9(16) | C(32)-C(31)-C(40)   | 109.3(5)  |
| C(38)-C(39)-C(40)   | 112.6(7) | C(47)-C(46)-H(46A)  | 110.4    | C(51)-C(52)-H(52A)  | 108.2     | C(54)-C(58)-C(60)   | 112.3(11) | C(36)-C(31)-C(40)   | 106.2(6)  |
| C(41)-C(40)-C(39)   | 112.0(8) | C(45)-C(46)-H(46A)  | 110.4    | C(53)-C(52)-H(52A)  | 108.2     | C(59)-C(58)-H(58)   | 107.0     | C(33)-C(32)-C(31)   | 113.6(6)  |
| C(41)-C(40)-C(31)   | 113.6(7) | C(47)-C(46)-H(46B)  | 110.4    | C(51)-C(52)-H(52B)  | 108.2     | C(54)-C(58)-H(58)   | 107.0     | C(33)-C(32)-H(32A)  | 108.8     |
| C(39)-C(40)-C(31)   | 111.3(5) | C(45)-C(46)-H(46B)  | 110.4    | C(53)-C(52)-H(52B)  | 108.2     | C(60)-C(58)-H(58)   | 107.0     | C(31)-C(32)-H(32A)  | 108.8     |
| C(41)-C(40)-H(40)   | 106.5    | H(46A)-C(46)-H(46B) | 108.6    | H(52A)-C(52)-H(52B) | 107.3     | C(58)-C(59)-H(59A)  | 109.5     | C(33)-C(32)-H(32B)  | 108.8     |
| C(39)-C(40)-H(40)   | 106.5    | C(46)-C(47)-C(51)   | 114.0(9) | C(52)-C(53)-C(54)   | 113.7(11) | C(58)-C(59)-H(59B)  | 109.5     |                     |           |
| C(31)-C(40)-H(40)   | 106.5    | C(46)-C(47)-C(43)   | 102.6(6) | C(52)-C(53)-H(53A)  | 108.8     | H(59A)-C(59)-H(59B) | 109.5     |                     |           |
| C(42)-C(41)-C(40)   | 113.8(7) | C(51)-C(47)-C(43)   | 118.0(8) | C(54)-C(53)-H(53A)  | 108.8     | C(58)-C(59)-H(59C)  | 109.5     |                     |           |

**Table S15.** Anisotropic displacement parameters ( $\text{\AA}^2 \times 10^3$ ) for 7 $\alpha$ -theonellasterol.<sup>a</sup>

|       | U <sup>11</sup> | U <sup>22</sup> | U <sup>33</sup> | U <sup>23</sup> | U <sup>13</sup> | U <sup>12</sup> |
|-------|-----------------|-----------------|-----------------|-----------------|-----------------|-----------------|
| C(1)  | 46(3)           | 168(8)          | 69(4)           | -4(4)           | 21(3)           | 6(4)            |
| C(2)  | 50(4)           | 169(8)          | 86(5)           | -23(5)          | 24(4)           | -7(5)           |
| C(3)  | 45(4)           | 191(10)         | 91(5)           | -15(5)          | 20(4)           | 17(5)           |
| C(4)  | 51(4)           | 190(9)          | 66(4)           | -12(5)          | 14(3)           | 12(5)           |
| C(5)  | 52(3)           | 165(8)          | 59(3)           | 6(4)            | 16(3)           | 13(4)           |
| C(6)  | 51(3)           | 150(7)          | 62(3)           | 5(4)            | 22(3)           | 17(4)           |
| C(7)  | 54(4)           | 176(9)          | 70(4)           | 5(4)            | 26(3)           | 12(5)           |
| C(8)  | 51(4)           | 177(9)          | 81(4)           | -11(5)          | 27(3)           | 1(5)            |
| O(1)  | 58(3)           | 225(8)          | 66(3)           | -9(3)           | 0(2)            | 34(4)           |
| C(9)  | 44(3)           | 152(8)          | 83(4)           | 4(5)            | 26(3)           | 3(4)            |
| O(2)  | 60(3)           | 174(6)          | 65(3)           | -5(3)           | -4(2)           | 20(3)           |
| C(10) | 50(4)           | 155(8)          | 81(4)           | -11(4)          | 29(3)           | 1(4)            |
| C(11) | 55(4)           | 166(9)          | 120(6)          | -38(6)          | 41(4)           | -14(5)          |
| C(12) | 71(5)           | 144(8)          | 119(6)          | -36(6)          | 50(5)           | -28(5)          |
| C(13) | 60(4)           | 134(8)          | 131(7)          | -5(6)           | 42(5)           | -19(5)          |
| C(14) | 56(4)           | 135(7)          | 102(5)          | 1(5)            | 36(4)           | -6(5)           |
| C(15) | 53(4)           | 166(9)          | 109(6)          | 11(6)           | 29(4)           | -9(5)           |
| C(16) | 65(5)           | 131(8)          | 154(8)          | 7(7)            | 40(5)           | -13(5)          |
| C(17) | 73(5)           | 119(7)          | 133(7)          | -6(6)           | 37(5)           | -22(5)          |
| C(18) | 80(6)           | 159(9)          | 109(6)          | 15(6)           | 35(5)           | 18(6)           |
| C(19) | 66(4)           | 212(10)         | 61(4)           | 15(5)           | 27(3)           | 20(5)           |
| C(20) | 79(6)           | 170(11)         | 182(11)         | 44(9)           | 43(7)           | 22(7)           |
| C(21) | 83(6)           | 123(8)          | 173(10)         | -30(7)          | 47(6)           | -27(5)          |
| C(22) | 101(7)          | 104(7)          | 185(11)         | -35(7)          | 26(7)           | -14(6)          |
| C(23) | 87(7)           | 103(7)          | 216(12)         | -50(8)          | 18(7)           | -20(6)          |
| C(24) | 96(8)           | 106(8)          | 217(13)         | -38(9)          | 18(8)           | -19(6)          |
| C(25) | 96(8)           | 151(11)         | 254(18)         | -3(11)          | 25(10)          | -42(8)          |
| C(26) | 128(12)         | 178(15)         | 360(30)         | 17(15)          | 89(16)          | -8(11)          |
| C(27) | 125(10)         | 213(15)         | 246(16)         | -112(13)        | 111(11)         | -70(10)         |
| C(28) | 85(7)           | 107(8)          | 217(14)         | -11(9)          | 8(8)            | -10(6)          |
| C(29) | 166(14)         | 131(10)         | 236(17)         | -8(11)          | 82(13)          | -4(10)          |
| C(30) | 124(10)         | 109(8)          | 280(20)         | -43(10)         | -3(12)          | 2(8)            |
| C(31) | 47(3)           | 176(8)          | 53(3)           | 12(4)           | 15(3)           | 5(4)            |
| C(32) | 74(5)           | 235(12)         | 57(4)           | 5(5)            | 24(4)           | 3(6)            |
| C(33) | 77(5)           | 227(12)         | 56(4)           | 1(5)            | 18(4)           | 12(6)           |
| C(34) | 60(4)           | 187(10)         | 68(4)           | -8(5)           | 11(3)           | 22(5)           |
| C(35) | 57(4)           | 155(8)          | 70(4)           | -2(4)           | 18(3)           | 18(5)           |
| C(36) | 53(4)           | 159(8)          | 55(3)           | 7(4)            | 13(3)           | 11(4)           |
| C(37) | 60(4)           | 149(7)          | 59(3)           | 3(4)            | 20(3)           | 1(4)            |
| C(38) | 49(3)           | 169(8)          | 48(3)           | 4(4)            | 10(3)           | -5(4)           |
| C(39) | 52(4)           | 154(7)          | 57(3)           | 5(4)            | 20(3)           | 2(4)            |
| C(40) | 61(4)           | 166(8)          | 63(4)           | -1(4)           | 30(3)           | -4(5)           |
| C(41) | 85(6)           | 224(12)         | 82(5)           | 21(6)           | 43(5)           | -14(7)          |
| C(42) | 65(5)           | 209(11)         | 92(5)           | 11(6)           | 35(4)           | -5(6)           |
| C(43) | 63(4)           | 169(9)          | 88(5)           | 23(5)           | 27(4)           | 7(5)            |
| C(44) | 53(4)           | 147(7)          | 74(4)           | 25(5)           | 24(3)           | 16(5)           |
| C(45) | 58(4)           | 167(8)          | 72(4)           | -18(5)          | 19(3)           | 1(5)            |
| C(46) | 65(5)           | 154(8)          | 94(5)           | 1(5)            | 19(4)           | 15(5)           |
| C(47) | 59(4)           | 149(8)          | 97(5)           | 8(5)            | 17(4)           | -1(5)           |

|       |         |         |         |         |         |          |
|-------|---------|---------|---------|---------|---------|----------|
| C(48) | 73(5)   | 181(10) | 78(5)   | 30(5)   | 22(4)   | 28(6)    |
| O(3)  | 56(3)   | 201(7)  | 78(3)   | -12(4)  | -5(2)   | 30(4)    |
| C(49) | 61(5)   | 190(10) | 93(5)   | -11(6)  | 24(4)   | -2(5)    |
| O(4)  | 67(3)   | 165(5)  | 69(3)   | 7(3)    | 1(2)    | 17(4)    |
| C(50) | 84(6)   | 182(11) | 124(8)  | 50(8)   | 19(5)   | 21(7)    |
| C(51) | 76(6)   | 164(10) | 138(8)  | 25(7)   | 16(6)   | -2(7)    |
| C(52) | 83(6)   | 136(9)  | 143(9)  | 20(7)   | -1(6)   | 0(6)     |
| C(53) | 105(8)  | 117(9)  | 228(15) | 46(9)   | 7(9)    | -13(7)   |
| C(54) | 69(5)   | 111(8)  | 189(11) | 15(7)   | -3(7)   | -2(6)    |
| C(55) | 111(11) | 193(16) | 310(30) | -76(19) | 43(15)  | -12(11)  |
| C(56) | 280(30) | 164(18) | 510(60) | 10(30)  | 230(40) | 49(19)   |
| C(57) | 174(16) | 340(30) | 189(15) | -17(16) | 85(13)  | -126(17) |
| C(58) | 84(7)   | 129(10) | 262(17) | 39(10)  | 28(9)   | 4(7)     |
| C(59) | 104(10) | 198(15) | 330(30) | 63(16)  | 78(13)  | 28(10)   |
| C(60) | 145(13) | 132(11) | 350(30) | 59(14)  | 15(16)  | -8(10)   |

<sup>a</sup>The anisotropic displacement factor exponent takes the form:  $-2\pi^2[h^2 a^{*2}U^{11} + \dots + 2 h k a^* b^* U^{12}]$

**Table S16.** Hydrogen coordinates ( $\times 10^4$ ) and isotropic displacement parameters ( $\text{\AA}^2 \times 10^3$ ) for 7 $\alpha$ -theonellasterol.

|        | x     | y    | z     | U(eq) |        | x     | y    | z     | U(eq) |
|--------|-------|------|-------|-------|--------|-------|------|-------|-------|
| H(2A)  | 9035  | 4282 | 12558 | 122   | H(19B) | 4249  | 4583 | 15976 | 134   |
| H(2B)  | 8287  | 4597 | 12059 | 122   | H(20A) | 4697  | 3364 | 8954  | 215   |
| H(3A)  | 9474  | 4365 | 15482 | 132   | H(20B) | 3153  | 3422 | 9815  | 215   |
| H(3B)  | 10487 | 4612 | 14805 | 132   | H(20C) | 5122  | 3565 | 10605 | 215   |
| H(4)   | 8123  | 4925 | 14575 | 124   | H(21)  | 2289  | 3250 | 6406  | 150   |
| H(6)   | 5241  | 4734 | 12397 | 104   | H(22A) | 151   | 3519 | 3296  | 162   |
| H(7A)  | 2592  | 4633 | 13141 | 119   | H(22B) | -675  | 3358 | 4587  | 162   |
| H(7B)  | 3169  | 4305 | 13409 | 119   | H(23A) | 1104  | 3092 | 2370  | 172   |
| H(8)   | 1006  | 4352 | 10618 | 122   | H(23B) | 901   | 2918 | 3974  | 172   |
| H(1)   | 9982  | 4713 | 17520 | 182   | H(24)  | -2278 | 3163 | 1520  | 177   |
| H(2)   | 1167  | 4709 | 9134  | 159   | H(25A) | -2152 | 2667 | 3643  | 210   |
| H(10)  | 5378  | 4473 | 9949  | 112   | H(25B) | -2431 | 2980 | 4273  | 210   |
| H(11A) | 6947  | 3926 | 10559 | 133   | H(26A) | -5151 | 3009 | 1623  | 329   |
| H(11B) | 7351  | 4177 | 9423  | 133   | H(26B) | -5366 | 2811 | 3128  | 329   |
| H(12A) | 4648  | 4070 | 7117  | 128   | H(26C) | -4967 | 2672 | 1513  | 329   |
| H(12B) | 5860  | 3788 | 7626  | 128   | H(27A) | 3873  | 3253 | 4381  | 274   |
| H(15A) | 190   | 3824 | 9655  | 131   | H(27B) | 4919  | 3437 | 6048  | 274   |
| H(15B) | -268  | 4066 | 8195  | 131   | H(27C) | 3757  | 3592 | 4303  | 274   |
| H(16A) | -909  | 3706 | 6303  | 139   | H(28)  | -2902 | 2715 | 17    | 176   |
| H(16B) | 141   | 3480 | 7753  | 139   | H(29A) | 168   | 2964 | -583  | 260   |
| H(17)  | 1717  | 3853 | 5854  | 129   | H(29B) | -1802 | 3110 | -1203 | 260   |
| H(18A) | 6592  | 4088 | 14719 | 173   | H(29C) | -1516 | 2807 | -1956 | 260   |
| H(18B) | 7337  | 3923 | 13381 | 173   | H(30A) | 837   | 2548 | 1208  | 281   |
| H(18C) | 5187  | 3949 | 13027 | 173   | H(30B) | -908  | 2357 | 257   | 281   |
| H(19A) | 6134  | 4709 | 17367 | 134   | H(30C) | -488  | 2444 | 2229  | 281   |
| H(32A) | -4157 | 5807 | 2288  | 146   | H(4A)  | -785  | 5325 | 9271  | 158   |
| H(32B) | -3595 | 5485 | 2810  | 146   | H(50A) | -2617 | 6463 | 6450  | 200   |
| H(33A) | -7290 | 5692 | 1530  | 145   | H(50B) | -820  | 6655 | 6947  | 200   |
| H(33B) | -6363 | 5486 | 500   | 145   | H(50C) | -1793 | 6591 | 8350  | 200   |
| H(34)  | -6077 | 5124 | 2557  | 129   | H(51)  | 1614  | 6753 | 9335  | 157   |
| H(36)  | -4210 | 5278 | 5443  | 108   | H(52A) | 4785  | 6505 | 11757 | 156   |
| H(37A) | -5714 | 5640 | 7455  | 107   | H(52B) | 3224  | 6662 | 12286 | 156   |
| H(37B) | -5328 | 5308 | 7808  | 107   | H(53A) | 4039  | 7097 | 11068 | 194   |
| H(38)  | -2929 | 5604 | 9670  | 108   | H(53B) | 5778  | 6930 | 10922 | 194   |
| H(40)  | -1665 | 5565 | 5751  | 114   | H(54)  | 6545  | 6849 | 14086 | 161   |
| H(41A) | -948  | 5903 | 4184  | 151   | H(55A) | 4211  | 7328 | 13811 | 251   |
| H(41B) | -2238 | 6136 | 4613  | 151   | H(55B) | 3549  | 7011 | 13939 | 251   |
| H(42A) | 874   | 6261 | 5972  | 143   | H(56A) | 5782  | 6976 | 16646 | 438   |
| H(42B) | 1248  | 5964 | 6979  | 143   | H(56B) | 4242  | 7207 | 16549 | 438   |
| H(45A) | -2100 | 6131 | 10777 | 119   | H(56C) | 6205  | 7306 | 16512 | 438   |
| H(45B) | -472  | 5902 | 11291 | 119   | H(57A) | 4318  | 6411 | 8525  | 341   |
| H(46A) | -146  | 6499 | 11101 | 128   | H(57B) | 4206  | 6749 | 8334  | 341   |
| H(46B) | 1379  | 6280 | 12212 | 128   | H(57C) | 2593  | 6556 | 7136  | 341   |
| H(47)  | 2247  | 6156 | 9895  | 125   | H(58)  | 8111  | 7292 | 14853 | 198   |
| H(48A) | -5314 | 6113 | 3975  | 167   | H(59A) | 9471  | 6911 | 13844 | 316   |
| H(48B) | -5145 | 6042 | 5924  | 167   | H(59B) | 10231 | 7215 | 13547 | 316   |
| H(48C) | -6817 | 5919 | 4377  | 167   | H(59C) | 8798  | 7052 | 11973 | 316   |
| H(3)   | -9450 | 5312 | 965   | 178   | H(60A) | 7986  | 7646 | 12878 | 339   |

|        |       |      |      |     |        |      |      |       |     |
|--------|-------|------|------|-----|--------|------|------|-------|-----|
| H(49A) | -9566 | 5266 | 3967 | 138 | H(60B) | 5900 | 7578 | 12658 | 339 |
| H(49B) | -8376 | 5370 | 5921 | 138 | H(60C) | 6791 | 7456 | 11296 | 339 |

**Table S17.** Hydrogen bonds for 7 $\alpha$ -theonellasterol [ $\text{\AA}$  and  $^\circ$ ].<sup>a</sup>

| D-H...A             | d(D-H) | d(H...A) | d(D...A) | <(DHA) |
|---------------------|--------|----------|----------|--------|
| O(4)-H(4A)...O(3)#1 | 0.83   | 2.03     | 2.732(7) | 142.2  |
| O(1)-H(1)...O(2)#1  | 0.83   | 2.13     | 2.764(7) | 133.4  |
| O(2)-H(2)...O(1)#2  | 0.83   | 1.96     | 2.764(7) | 164.4  |
| O(3)-H(3)...O(4)#2  | 0.83   | 2.17     | 2.732(7) | 124.8  |

<sup>a</sup>Symmetry transformations used to generate equivalent atoms: #1 x+1, y, z+1 #2 x-1, y, z-1

**Table S18.** Torsion angles [°] for 7 $\alpha$ -theonellasterol.

|                         |            |                         |            |
|-------------------------|------------|-------------------------|------------|
| C(18)-C(1)-C(2)-C(3)    | -67.5(11)  | C(6)-C(1)-C(10)-C(9)    | -56.9(10)  |
| C(6)-C(1)-C(2)-C(3)     | 53.0(11)   | C(9)-C(10)-C(11)-C(12)  | 27.6(12)   |
| C(10)-C(1)-C(2)-C(3)    | 170.5(9)   | C(10)-C(11)-C(12)-C(13) | -56.3(13)  |
| C(1)-C(2)-C(3)-C(4)     | -54.1(13)  | C(11)-C(12)-C(13)-C(14) | 51.1(12)   |
| C(2)-C(3)-C(4)-O(1)     | 178.4(9)   | C(11)-C(12)-C(13)-C(20) | -68.5(12)  |
| C(2)-C(3)-C(4)-C(5)     | 53.1(11)   | C(11)-C(12)-C(13)-C(17) | 163.9(9)   |
| O(1)-C(4)-C(5)-C(19)    | 2.8(15)    | C(8)-C(9)-C(14)-C(13)   | 174.3(8)   |
| C(3)-C(4)-C(5)-C(19)    | 126.8(10)  | C(10)-C(9)-C(14)-C(13)  | -4.5(14)   |
| O(1)-C(4)-C(5)-C(6)     | -178.6(8)  | C(8)-C(9)-C(14)-C(15)   | 2.6(14)    |
| C(3)-C(4)-C(5)-C(6)     | -54.6(10)  | C(10)-C(9)-C(14)-C(15)  | -176.2(8)  |
| C(19)-C(5)-C(6)-C(7)    | 2.4(14)    | C(12)-C(13)-C(14)-C(9)  | -22.9(13)  |
| C(4)-C(5)-C(6)-C(7)     | -176.2(9)  | C(20)-C(13)-C(14)-C(9)  | 98.0(11)   |
| C(19)-C(5)-C(6)-C(1)    | -125.7(10) | C(17)-C(13)-C(14)-C(9)  | -144.3(9)  |
| C(4)-C(5)-C(6)-C(1)     | 55.7(11)   | C(12)-C(13)-C(14)-C(15) | 150.0(8)   |
| C(2)-C(1)-C(6)-C(7)     | 177.6(7)   | C(20)-C(13)-C(14)-C(15) | -89.1(10)  |
| C(18)-C(1)-C(6)-C(7)    | -62.5(8)   | C(17)-C(13)-C(14)-C(15) | 28.6(10)   |
| C(10)-C(1)-C(6)-C(7)    | 58.6(8)    | C(9)-C(14)-C(15)-C(16)  | 164.9(9)   |
| C(2)-C(1)-C(6)-C(5)     | -53.1(9)   | C(13)-C(14)-C(15)-C(16) | -7.9(10)   |
| C(18)-C(1)-C(6)-C(5)    | 66.8(9)    | C(14)-C(15)-C(16)-C(17) | -16.7(11)  |
| C(10)-C(1)-C(6)-C(5)    | -172.1(7)  | C(15)-C(16)-C(17)-C(13) | 34.4(11)   |
| C(5)-C(6)-C(7)-C(8)     | 173.8(8)   | C(15)-C(16)-C(17)-C(21) | 164.4(9)   |
| C(1)-C(6)-C(7)-C(8)     | -58.0(10)  | C(14)-C(13)-C(17)-C(16) | -38.0(10)  |
| C(6)-C(7)-C(8)-O(2)     | -67.5(9)   | C(12)-C(13)-C(17)-C(16) | -154.5(9)  |
| C(6)-C(7)-C(8)-C(9)     | 53.9(11)   | C(20)-C(13)-C(17)-C(16) | 78.0(10)   |
| O(2)-C(8)-C(9)-C(14)    | -112.9(10) | C(14)-C(13)-C(17)-C(21) | -163.7(8)  |
| C(7)-C(8)-C(9)-C(14)    | 128.2(9)   | C(12)-C(13)-C(17)-C(21) | 79.7(12)   |
| O(2)-C(8)-C(9)-C(10)    | 66.1(8)    | C(20)-C(13)-C(17)-C(21) | -47.7(11)  |
| C(7)-C(8)-C(9)-C(10)    | -52.8(10)  | C(16)-C(17)-C(21)-C(22) | 53.7(13)   |
| C(14)-C(9)-C(10)-C(11)  | 2.3(12)    | C(13)-C(17)-C(21)-C(22) | 174.9(10)  |
| C(8)-C(9)-C(10)-C(11)   | -176.7(8)  | C(16)-C(17)-C(21)-C(27) | -178.2(13) |
| C(14)-C(9)-C(10)-C(1)   | -125.7(9)  | C(13)-C(17)-C(21)-C(27) | -57.0(16)  |
| C(8)-C(9)-C(10)-C(1)    | 55.3(10)   | C(27)-C(21)-C(22)-C(23) | 58.9(17)   |
| C(2)-C(1)-C(10)-C(11)   | 57.9(11)   | C(17)-C(21)-C(22)-C(23) | -173.1(11) |
| C(18)-C(1)-C(10)-C(11)  | -63.3(9)   | C(21)-C(22)-C(23)-C(24) | 163.1(12)  |
| C(6)-C(1)-C(10)-C(11)   | 175.8(7)   | C(22)-C(23)-C(24)-C(28) | 156.9(12)  |
| C(2)-C(1)-C(10)-C(9)    | -174.8(9)  | C(22)-C(23)-C(24)-C(25) | -77.0(15)  |
| C(18)-C(1)-C(10)-C(9)   | 63.9(9)    | C(23)-C(24)-C(25)-C(26) | 167.0(13)  |
| C(28)-C(24)-C(25)-C(26) | -68.4(16)  | C(48)-C(31)-C(40)-C(41) | -64.9(9)   |
| C(23)-C(24)-C(28)-C(29) | -73.0(15)  | C(32)-C(31)-C(40)-C(41) | 56.5(12)   |
| C(25)-C(24)-C(28)-C(29) | 162.9(12)  | C(36)-C(31)-C(40)-C(41) | 174.3(8)   |
| C(23)-C(24)-C(28)-C(30) | 55.7(16)   | C(48)-C(31)-C(40)-C(39) | 62.6(9)    |
| C(25)-C(24)-C(28)-C(30) | -68.4(16)  | C(32)-C(31)-C(40)-C(39) | -176.0(9)  |
| C(48)-C(31)-C(32)-C(33) | -68.5(12)  | C(36)-C(31)-C(40)-C(39) | -58.1(10)  |
| C(36)-C(31)-C(32)-C(33) | 54.3(12)   | C(39)-C(40)-C(41)-C(42) | 29.5(12)   |
| C(40)-C(31)-C(32)-C(33) | 170.1(10)  | C(31)-C(40)-C(41)-C(42) | 156.6(9)   |
| C(31)-C(32)-C(33)-C(34) | -55.8(13)  | C(40)-C(41)-C(42)-C(43) | -59.6(13)  |
| C(32)-C(33)-C(34)-O(3)  | -177.9(7)  | C(41)-C(42)-C(43)-C(44) | 55.4(11)   |
| C(32)-C(33)-C(34)-C(35) | 56.6(10)   | C(41)-C(42)-C(43)-C(50) | -69.3(12)  |
| O(3)-C(34)-C(35)-C(49)  | -3.2(15)   | C(41)-C(42)-C(43)-C(47) | 166.2(9)   |
| C(33)-C(34)-C(35)-C(49) | 121.3(11)  | C(38)-C(39)-C(44)-C(43) | 173.9(7)   |
| O(3)-C(34)-C(35)-C(36)  | 176.2(8)   | C(40)-C(39)-C(44)-C(43) | -4.2(13)   |



|                         |            |                         |           |
|-------------------------|------------|-------------------------|-----------|
| C(33)-C(34)-C(35)-C(36) | -59.2(10)  | C(38)-C(39)-C(44)-C(45) | 0.1(13)   |
| C(49)-C(35)-C(36)-C(37) | 5.0(15)    | C(40)-C(39)-C(44)-C(45) | -178.0(7) |
| C(34)-C(35)-C(36)-C(37) | -174.5(9)  | C(42)-C(43)-C(44)-C(39) | -25.6(11) |
| C(49)-C(35)-C(36)-C(31) | -122.8(11) | C(50)-C(43)-C(44)-C(39) | 99.9(11)  |
| C(34)-C(35)-C(36)-C(31) | 57.8(10)   | C(47)-C(43)-C(44)-C(39) | -145.1(8) |
| C(48)-C(31)-C(36)-C(35) | 68.2(8)    | C(42)-C(43)-C(44)-C(45) | 149.2(7)  |
| C(32)-C(31)-C(36)-C(35) | -53.9(8)   | C(50)-C(43)-C(44)-C(45) | -85.3(9)  |
| C(40)-C(31)-C(36)-C(35) | -171.7(7)  | C(47)-C(43)-C(44)-C(45) | 29.6(9)   |
| C(48)-C(31)-C(36)-C(37) | -60.2(8)   | C(39)-C(44)-C(45)-C(46) | 166.7(8)  |
| C(32)-C(31)-C(36)-C(37) | 177.7(7)   | C(43)-C(44)-C(45)-C(46) | -8.0(9)   |
| C(40)-C(31)-C(36)-C(37) | 59.9(8)    | C(44)-C(45)-C(46)-C(47) | -18.8(10) |
| C(35)-C(36)-C(37)-C(38) | 175.4(8)   | C(45)-C(46)-C(47)-C(51) | 165.9(8)  |
| C(31)-C(36)-C(37)-C(38) | -58.0(9)   | C(45)-C(46)-C(47)-C(43) | 37.1(10)  |
| C(36)-C(37)-C(38)-O(4)  | -70.9(8)   | C(44)-C(43)-C(47)-C(46) | -40.2(10) |
| C(36)-C(37)-C(38)-C(39) | 51.7(10)   | C(42)-C(43)-C(47)-C(46) | -156.0(9) |
| O(4)-C(38)-C(39)-C(44)  | -108.7(9)  | C(50)-C(43)-C(47)-C(46) | 77.1(10)  |
| C(37)-C(38)-C(39)-C(44) | 130.3(8)   | C(44)-C(43)-C(47)-C(51) | -166.4(9) |
| O(4)-C(38)-C(39)-C(40)  | 69.6(7)    | C(42)-C(43)-C(47)-C(51) | 77.8(12)  |
| C(37)-C(38)-C(39)-C(40) | -51.5(9)   | C(50)-C(43)-C(47)-C(51) | -49.1(11) |
| C(44)-C(39)-C(40)-C(41) | 2.7(12)    | C(46)-C(47)-C(51)-C(52) | 52.0(13)  |
| C(38)-C(39)-C(40)-C(41) | -175.6(8)  | C(43)-C(47)-C(51)-C(52) | 172.5(9)  |
| C(44)-C(39)-C(40)-C(31) | -125.7(9)  | C(46)-C(47)-C(51)-C(57) | 176.4(12) |
| C(38)-C(39)-C(40)-C(31) | 56.0(10)   | C(43)-C(47)-C(51)-C(57) | -63.1(14) |
| C(52)-C(53)-C(54)-C(55) | -76.0(16)  | C(55)-C(54)-C(58)-C(59) | 165.8(17) |
| C(52)-C(53)-C(54)-C(58) | 156.2(11)  | C(53)-C(54)-C(58)-C(59) | -70.6(16) |
| C(58)-C(54)-C(55)-C(56) | -68(3)     | C(55)-C(54)-C(58)-C(60) | -69(2)    |
| C(53)-C(54)-C(55)-C(56) | 165(2)     | C(53)-C(54)-C(58)-C(60) | 55(2)     |
